# Supplementary material for: Rhodium(ii)-catalyzed intramolecular annulation of 1-sulfonyl-1,2,3-triazoles with indoles: facile synthesis of functionalized tetrahydro-β-carbolines
Source: Royal Society of Chemistry journal article supplement (doi:10.1039/c6ra02923j), 2016-01-01
Supplement: c6ra02923j1.pdf [file c6ra02923j1.pdf]

## Supporting Information

### Rhodium(II)-Catalyzed Intramolecular Annulation of 1-Sulfonyl-1,2,3-Triazoles with Indoles: Facile Synthesis of Functionalized Tetrahydro- $\beta$ -Carbolines

Hai Shang,<sup>a</sup> Yu Tian,<sup>a</sup> Jun Luo,<sup>a</sup> Ling-Yu Li,<sup>a</sup> Ye-Feng Tang<sup>\*b</sup> and Zhong-Mei Zou<sup>\*a</sup>

<sup>a</sup>Institute of Medicinal Plant Development, Chinese Academy of Medical Sciences and Peking Union Medical College, Beijing 100193, P. R. China

<sup>b</sup>Comprehensive AIDS Research Center, Department of Pharmacology & Pharmaceutical Sciences, School of Medicine, Tsinghua University, Beijing 100084, P. R. China

### Table of Contents

|                                                                                                                      |    |
|----------------------------------------------------------------------------------------------------------------------|----|
| 1. General Information                                                                                               | 2  |
| 2. Procedure for the Preparation of Triazole Substrates                                                              | 3  |
| 3. Analysis Data of Triazole Substrates                                                                              | 5  |
| 4. General Procedures for Rhodium(II)-Catalyzed Intramolecular Annulation of 1-Sulfonyl-1,2,3-Triazoles with Indoles | 14 |
| 5. Analysis Data of Annulation Products                                                                              | 14 |
| 6. The Procedure for the One-pot Three-steps Reaction                                                                | 25 |
| 7. Preparation of 9-(methoxymethyl)-4-methyl-9 <i>H</i> -pyrido[3,4- <i>b</i> ] indole                               | 25 |
| 8. X-ray Crystallographic Studies for <b>11a</b>                                                                     | 31 |
| 9. NMR Spectrum                                                                                                      | 39 |

## 1. General Information

NMR spectra were recorded on Bruker AV III 600 NMR spectrometer and Bruker AV 400 instrument. Solvent signal was used as reference for  $^1\text{H}$  NMR ( $\text{CDCl}_3$ , 7.26 ppm) and  $^{13}\text{C}$  NMR ( $\text{CDCl}_3$ , 77.16 ppm). The following abbreviations were used to explain the multiplicities: s = singlet, d = doublet, t = triplet, q = quartet, td = triple doublet, m = multiplet. Infrared (IR) spectra were recorded on a FTIR-8400S spectrometer. High-resolution mass spectra (HRMS) were recorded on a Waters SYNAPT G2 HDMS. Reactions were monitored by Thin Layer Chromatography on plates ( $\text{GF}_{254}$ ) supplied by Yantai Chemicals (China). If not specially mentioned, flash column chromatography uses silica gel (200-300 mesh) supplied by Tsingtao Haiyang Chemicals (China). Solvent purification was conducted according to Purification of Laboratory Chemicals (Peerrin, D. D.; Armarego, W. L. and Perrins, D. R., Pergamon Press: Oxford, 1980).

## 2. Procedure for the Preparation of Triazole Substrates

**Procedure A:** Triazoles **6a-6i**, **6l-6m** and **6s-6w** were prepared referring to the literature procedures<sup>[1-4]</sup> as described below.

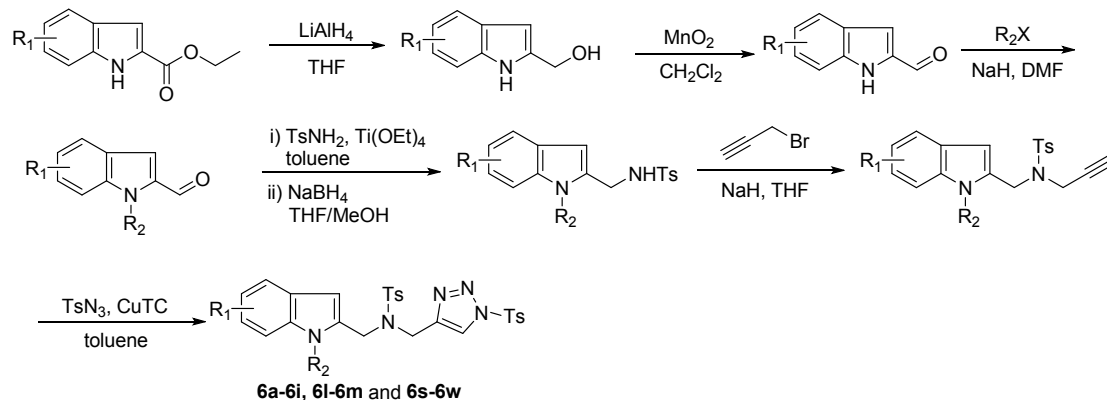

**Procedure B:** Triazoles **6j-6k** and **6q** were prepared referring to the literature procedures<sup>[2-5]</sup> as described below.

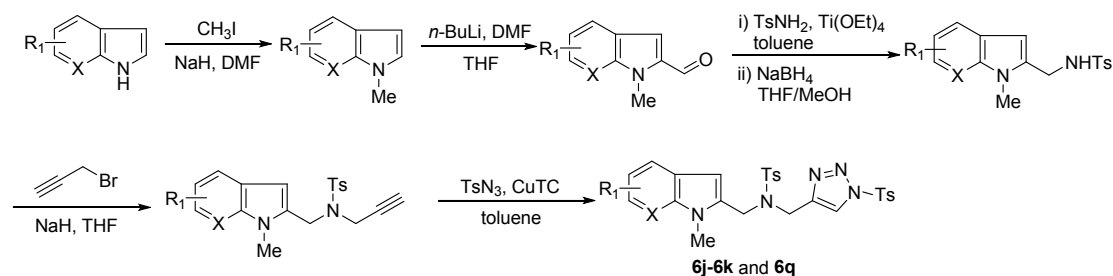

**Procedure C:** Triazole **6n** was prepared referring to the literature procedures<sup>[3-4, 6]</sup> as described below.

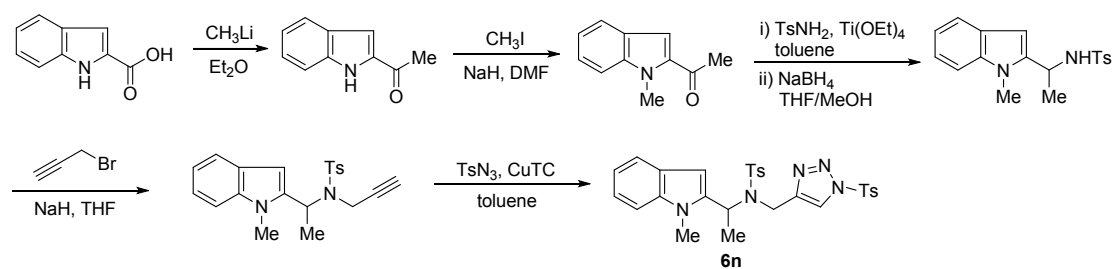

**Procedure D:** Triazole **6o** was prepared referring to the literature procedures<sup>[2, 4, 7-8]</sup> as described below.

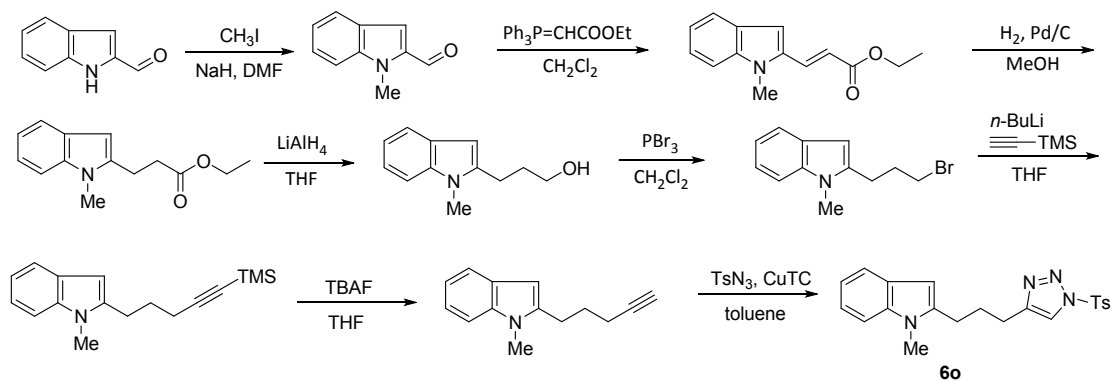

**Procedure E:** Triazole **6p** was prepared referring to the literature procedures<sup>[1, 4, 9]</sup> as described below.

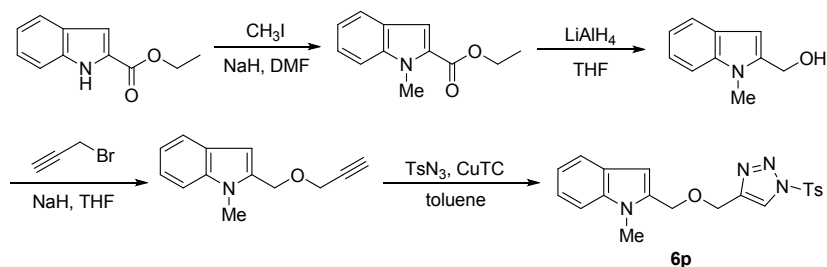

**Procedure F:** Triazole **6r** was prepared referring to the literature procedures<sup>[2-4]</sup> as described below.

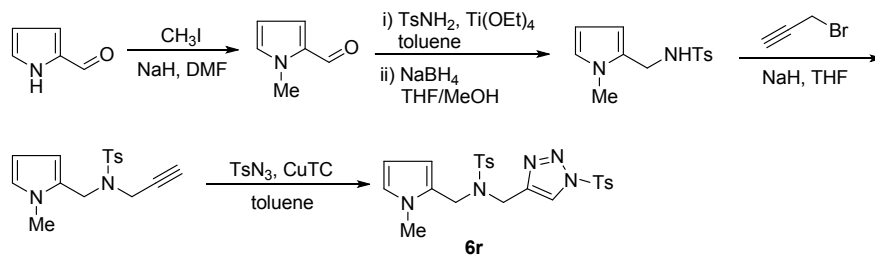

### 3. Analysis Data of Triazole Substrates

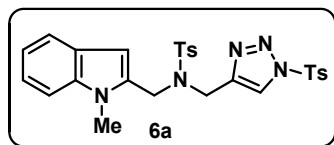

**4-methyl-*N*-((1-methyl-1*H*-indol-2-yl)methyl)-*N*-((1-tosyl-1*H*-1,2,3-triazol-4-yl)methyl)benzenesulfonamide (6a):** Yield: 90%; <sup>1</sup>H NMR (600 MHz, CDCl<sub>3</sub>) δ 7.83 (d, *J* = 8.4 Hz, 2H), 7.61 (d, *J* = 8.3 Hz, 2H), 7.52-7.50 (m, 2H), 7.35 (d, *J* = 8.3 Hz, 2H), 7.30 (d, *J* = 8.1 Hz, 1H), 7.26-7.22 (m, 3H), 7.10 (td, *J* = 7.7 Hz, 0.6 Hz, 1H), 6.48 (s, 1H), 4.67 (s, 2H), 4.35 (s, 2H), 3.79 (s, 3H), 2.45 (s, 3H), 2.44 (s, 3H); <sup>13</sup>C NMR (150 MHz, CDCl<sub>3</sub>) δ 147.5, 144.3, 142.8, 138.4, 136.0, 133.0, 132.3, 130.6, 130.0, 128.8, 127.3, 127.1, 122.4, 120.8, 119.9, 109.5, 104.9, 44.7, 40.7, 30.0, 22.0, 21.7; IR  $\nu_{\max}$  (KBr): 3420, 3152, 2927, 2365, 1594, 1395, 1336, 1194, 1161, 1091, 814, 749 cm<sup>-1</sup>; HRMS *m/z* calcd for C<sub>27</sub>H<sub>27</sub>N<sub>5</sub>NaO<sub>4</sub>S<sub>2</sub> [M+Na]<sup>+</sup>: 572.1402; found: 572.1404.

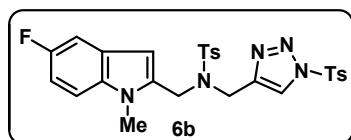

***N*-((5-fluoro-1-methyl-1*H*-indol-2-yl)methyl)-4-methyl-*N*-((1-tosyl-1*H*-1,2,3-triazol-4-yl)methyl)benzenesulfonamide (6b):**

Yield: 84%; <sup>1</sup>H NMR (600 MHz, CDCl<sub>3</sub>) δ 7.82 (d, *J* = 8.4 Hz, 2H), 7.61 (d, *J* = 8.2 Hz, 2H), 7.51 (s, 1H), 7.35 (d, *J* = 8.4 Hz, 2H), 7.24 (d, *J* = 8.1 Hz, 2H), 7.18 (dd, *J* = 8.9 Hz, 4.3 Hz, 1H), 7.12 (dd, *J* = 9.4 Hz, 2.4 Hz, 1H), 6.97 (td, *J* = 9.1 Hz, 2.4 Hz, 1H), 6.41 (s, 1H), 4.64 (s, 2H), 4.35 (s, 2H), 3.76 (s, 3H), 2.45 (s, 3H), 2.43 (s, 3H); <sup>13</sup>C NMR (150 MHz, CDCl<sub>3</sub>) δ 158.0 (d, *J* = 234.3 Hz), 147.5, 144.4, 142.8, 135.9, 135.0, 134.0, 132.9, 130.5, 130.0, 128.8, 127.3, 127.2 (d, *J* = 10.1 Hz), 122.3, 110.7 (d, *J* = 26.5 Hz), 110.1 (d, *J* = 9.8 Hz), 105.5 (d, *J* = 23.6 Hz), 104.6 (d, *J* = 4.5 Hz), 44.7, 41.0, 30.2, 21.9, 21.6; IR  $\nu_{\max}$  (KBr): 3152, 3066, 2926, 2359, 2332, 1593, 1487, 1394, 1329, 1193, 1154, 1091, 904, 675 cm<sup>-1</sup>; HRMS *m/z* calcd for C<sub>27</sub>H<sub>26</sub>FN<sub>5</sub>NaO<sub>4</sub>S<sub>2</sub> [M+Na]<sup>+</sup>: 590.1308; found: 590.1311.

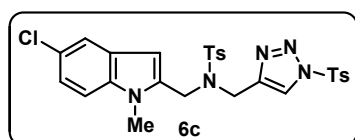

***N*-((5-chloro-1-methyl-1*H*-indol-2-yl)methyl)-4-methyl-*N*-((1-tosyl-1*H*-1,2,3-triazol-4-yl)methyl)benzenesulfonamide (6c):**

Yield: 89%; <sup>1</sup>H NMR (600 MHz, CDCl<sub>3</sub>) δ 7.81 (d, *J* = 8.1 Hz, 2H), 7.60 (d, *J* = 7.9 Hz, 2H), 7.51 (s, 1H), 7.44 (s, 1H), 7.36 (d, *J* = 8.1 Hz, 2H), 7.25 (d, *J* = 7.9 Hz, 2H), 7.19-7.16 (m, 2H), 6.39 (s, 1H), 4.65 (s, 2H), 4.34 (s, 2H), 3.77 (s, 3H), 2.45 (s, 3H), 2.44 (s, 3H); <sup>13</sup>C NMR (150 MHz, CDCl<sub>3</sub>) δ 147.6, 144.5, 142.7, 136.7, 135.7, 133.7, 132.8, 130.6,

130.0, 128.8, 128.0, 127.3, 125.5, 122.7, 122.3, 120.1, 110.5, 104.3, 44.7, 41.0, 30.2, 22.0, 21.7;  
IR  $\nu_{\max}$  (KBr): 3149, 2922, 2359, 2241, 1595, 1473, 1393, 1336, 1193, 1179, 1163, 1092, 975  $\text{cm}^{-1}$ ;  
HRMS  $m/z$  calcd for  $\text{C}_{27}\text{H}_{26}\text{ClN}_5\text{NaO}_4\text{S}_2$   $[\text{M}+\text{Na}]^+$ : 606.1012; found: 606.1016.

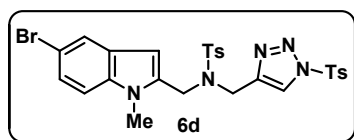

*N*-((5-bromo-1-methyl-1*H*-indol-2-yl)methyl)-4-methyl-*N*-  
((1-tosyl-1*H*-1,2,3-triazol-4-yl)methyl)benzenesulfonamide

**(6d)**: Yield: 79%;  $^1\text{H}$  NMR (600 MHz,  $\text{CDCl}_3$ )  $\delta$  7.82 (d,  $J$  =

8.5 Hz, 2H), 7.62-7.59 (m, 3H), 7.52 (s, 1H), 7.37 (d,  $J$  = 8.2 Hz, 2H), 7.30 (dd,  $J$  = 8.7 Hz, 1.9 Hz, 1H), 7.25 (d,  $J$  = 8.1 Hz, 2H), 7.15 (d,  $J$  = 8.7 Hz, 1H), 6.39 (s, 1H), 4.65 (s, 2H), 4.34 (s, 2H), 3.77 (s, 3H), 2.46 (s, 3H), 2.44 (s, 3H);  $^{13}\text{C}$  NMR (150 MHz,  $\text{CDCl}_3$ )  $\delta$  147.6, 144.5, 142.7, 137.0, 135.9, 133.7, 132.9, 130.6, 130.0, 128.8, 128.7, 127.4, 125.2, 123.3, 122.3, 113.2, 110.9, 104.3, 44.7, 41.0, 30.2, 22.0, 21.7; IR  $\nu_{\max}$  (KBr): 3436, 3147, 2361, 2242, 1595, 1471, 1392, 1336, 1193, 1179, 1162, 1092  $\text{cm}^{-1}$ ; HRMS  $m/z$  calcd for  $\text{C}_{27}\text{H}_{26}\text{BrN}_5\text{NaO}_4\text{S}_2$   $[\text{M}+\text{Na}]^+$ : 650.0507; found: 650.0502.

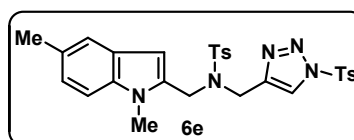

*N*-((1,5-dimethyl-1*H*-indol-2-yl)methyl)-4-methyl-*N*-((1-  
tosyl-1*H*-1,2,3-triazol-4-yl)methyl)benzenesulfonamide **(6e)**:

Yield: 83%;  $^1\text{H}$  NMR (600 MHz,  $\text{CDCl}_3$ )  $\delta$  7.83 (d,  $J$  = 8.4 Hz,

2H), 7.61 (d,  $J$  = 8.2 Hz, 2H), 7.51 (s, 1H), 7.35 (d,  $J$  = 8.2 Hz, 2H), 7.29 (s, 1H), 7.24 (d,  $J$  = 8.1 Hz, 2H), 7.18 (d,  $J$  = 8.4 Hz, 1H), 7.07 (dd,  $J$  = 8.4 Hz, 1.1 Hz, 1H), 6.38 (s, 1H), 4.65 (s, 2H), 4.34 (s, 2H), 3.75 (s, 3H), 2.45 (s, 3H), 2.44 (s, 6H);  $^{13}\text{C}$  NMR (150 MHz,  $\text{CDCl}_3$ )  $\delta$  147.9, 144.7, 143.3, 137.3, 136.4, 133.5, 132.6, 131.0, 130.4, 129.5, 129.2, 127.8, 124.5, 122.8, 120.8, 109.6, 104.8, 45.2, 41.2, 30.5, 22.4, 22.1, 21.9; IR  $\nu_{\max}$  (KBr): 3434, 3135, 2921, 2357, 1594, 1405, 1329, 1194, 1178, 1159, 1089, 674, 575  $\text{cm}^{-1}$ ; HRMS  $m/z$  calcd for  $\text{C}_{28}\text{H}_{29}\text{N}_5\text{NaO}_4\text{S}_2$   $[\text{M}+\text{Na}]^+$ : 586.1559; found: 586.1556.

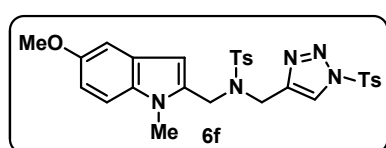

*N*-((5-methoxy-1-methyl-1*H*-indol-2-yl)methyl)-4-  
methyl-*N*-((1-tosyl-1*H*-1,2,3-triazol-4-  
yl)methyl)benzenesulfonamide **(6f)**: Yield: 77%;  $^1\text{H}$  NMR

(600 MHz,  $\text{CDCl}_3$ )  $\delta$  7.81 (d,  $J$  = 8.4 Hz, 2H), 7.61 (d,  $J$  = 8.1 Hz, 2H), 7.50 (s, 1H), 7.35 (d,  $J$  =

8.4 Hz, 2H), 7.24 (d,  $J = 8.1$  Hz, 2H), 7.18 (d,  $J = 8.9$  Hz, 1H), 6.95 (d,  $J = 2.4$  Hz, 1H), 6.90 (dd,  $J = 8.9$  Hz, 2.4 Hz, 1H), 6.38 (s, 1H), 4.62 (s, 2H), 4.35 (s, 2H), 3.82 (s, 3H), 3.75 (s, 3H), 2.45 (s, 3H), 2.44 (s, 3H);  $^{13}\text{C}$  NMR (150 MHz,  $\text{CDCl}_3$ )  $\delta$  154.4, 147.4, 144.3, 143.0, 135.9, 133.8, 133.0, 132.7, 130.6, 130.0, 128.8, 127.4, 127.4, 122.3, 112.8, 110.2, 104.4, 102.5, 56.0, 44.9, 41.0, 30.1, 22.0, 21.7; IR  $\nu_{\text{max}}$  (KBr): 3366, 3158, 2920, 2849, 2363, 1489, 1398, 1336, 1195, 1162, 668, 587  $\text{cm}^{-1}$ ; HRMS  $m/z$  calcd for  $\text{C}_{28}\text{H}_{29}\text{N}_5\text{NaO}_5\text{S}_2$   $[\text{M}+\text{Na}]^+$ : 602.1508; found: 602.1509.

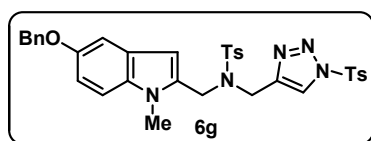

***N*-((5-(benzyloxy)-1-methyl-1*H*-indol-2-yl)methyl)-4-methyl-*N*-((1-tosyl-1*H*-1,2,3-triazol-4-yl)methyl)benzenesulfonamide (6g):** Yield: 93%;  $^1\text{H}$  NMR

(600 MHz,  $\text{CDCl}_3$ )  $\delta$  7.82 (d,  $J = 7.9$  Hz, 2H), 7.62 (d,  $J = 7.7$  Hz, 2H), 7.52 (s, 1H), 7.48 (d,  $J = 7.6$  Hz, 2H), 7.39 (t,  $J = 7.4$  Hz, 2H), 7.35 (d,  $J = 8.0$  Hz, 2H), 7.32 (t,  $J = 7.2$  Hz, 1H), 7.24 (d,  $J = 7.9$  Hz, 2H), 7.20 (d,  $J = 8.9$  Hz, 1H), 7.06 (s, 1H), 7.01 (d,  $J = 8.8$  Hz, 1H), 6.40 (s, 1H), 5.09 (s, 2H), 4.63 (s, 2H), 4.36 (s, 2H), 3.75 (s, 3H), 2.44 (s, 3H), 2.43 (s, 3H);  $^{13}\text{C}$  NMR (150 MHz,  $\text{CDCl}_3$ )  $\delta$  153.4, 147.4, 144.2, 142.8, 137.7, 135.7, 133.8, 132.8, 132.7, 130.5, 129.9, 128.7, 128.6, 127.8, 127.5, 127.3, 127.2, 122.3, 113.3, 110.1, 104.4, 104.0, 70.8, 44.7, 40.8, 30.0, 21.9, 21.6; IR  $\nu_{\text{max}}$  (KBr): 3155, 3031, 2923, 1594, 1487, 1394, 1330, 1193, 1153, 1092, 901, 754  $\text{cm}^{-1}$ ; HRMS  $m/z$  calcd for  $\text{C}_{34}\text{H}_{33}\text{N}_5\text{NaO}_5\text{S}_2$   $[\text{M}+\text{Na}]^+$ : 678.1821; found: 678.1821.

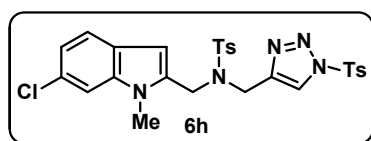

***N*-((6-chloro-1-methyl-1*H*-indol-2-yl)methyl)-4-methyl-*N*-((1-tosyl-1*H*-1,2,3-triazol-4-yl)methyl)benzenesulfonamide (6h):** Yield: 83%;  $^1\text{H}$  NMR (600 MHz,  $\text{CDCl}_3$ )  $\delta$  7.86 (d,  $J =$

8.4 Hz, 2H), 7.60 (d,  $J = 8.2$  Hz, 2H), 7.56 (s, 1H), 7.39 (d,  $J = 8.5$  Hz, 1H), 7.37 (d,  $J = 8.3$  Hz, 2H), 7.25-7.22 (m, 3H), 7.04 (dd,  $J = 8.4$  Hz, 1.7 Hz, 1H), 6.45 (s, 1H), 4.63 (s, 2H), 4.34 (s, 2H), 3.70 (s, 3H), 2.46 (s, 3H), 2.43 (s, 3H);  $^{13}\text{C}$  NMR (150 MHz,  $\text{CDCl}_3$ )  $\delta$  147.6, 144.4, 142.7, 138.7, 135.9, 133.1, 132.9, 130.6, 130.0, 128.8, 128.4, 127.3, 125.6, 122.4, 121.7, 120.6, 109.5, 105.0, 44.7, 40.8, 30.1, 22.0, 21.7; IR  $\nu_{\text{max}}$  (film): 3436, 2921, 2850, 1595, 1395, 1338, 1194, 1160, 1090, 812, 666  $\text{cm}^{-1}$ ; HRMS  $m/z$  calcd for  $\text{C}_{27}\text{H}_{26}\text{ClN}_5\text{NaO}_4\text{S}_2$   $[\text{M}+\text{Na}]^+$ : 606.1012; found: 606.1016.

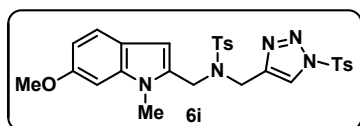

*N*-((6-methoxy-1-methyl-1*H*-indol-2-yl)methyl)-4-methyl-*N*-  
((1-tosyl-1*H*-1,2,3-triazol-4-yl)methyl)benzenesulfonamide

**(6i)**: Yield: 93%; <sup>1</sup>H NMR (600 MHz, CDCl<sub>3</sub>) δ 7.81 (d, *J* =

8.4 Hz, 2H), 7.61 (d, *J* = 8.3 Hz, 2H), 7.46 (s, 1H), 7.37 (d, *J* = 8.5 Hz, 1H), 7.34 (d, *J* = 8.2 Hz, 2H), 7.24 (d, *J* = 8.1 Hz, 2H), 6.77 (dd, *J* = 8.5 Hz, 2.2 Hz, 1H), 6.74 (d, *J* = 1.7 Hz, 1H), 6.39 (s, 1H), 4.62 (s, 2H), 4.33 (s, 2H), 3.89 (s, 3H), 3.73 (s, 3H), 2.44 (s, 3H), 2.43 (s, 3H); <sup>13</sup>C NMR (150 MHz, CDCl<sub>3</sub>) δ 156.9, 147.4, 144.2, 142.9, 139.1, 135.9, 133.0, 130.9, 130.5, 129.9, 128.8, 127.3, 122.3, 121.4, 121.3, 110.1, 104.9, 93.0, 55.8, 45.0, 40.8, 30.0, 21.9, 21.7; IR  $\nu_{\max}$  (KBr): 3142, 2942, 2838, 1617, 1402, 1329, 1193, 1176, 1160, 1089, 673, 576 cm<sup>-1</sup>; HRMS *m/z* calcd for C<sub>28</sub>H<sub>29</sub>N<sub>5</sub>NaO<sub>5</sub>S<sub>2</sub> [M+Na]<sup>+</sup>: 602.1508; found: 602.1507.

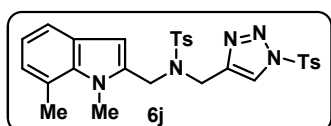

*N*-((1,7-dimethyl-1*H*-indol-2-yl)methyl)-4-methyl-*N*-((1-tosyl-

**1*H*-1,2,3-triazol-4-yl)methyl)benzenesulfonamide (6j)**: Yield:

95%; <sup>1</sup>H NMR (600 MHz, CDCl<sub>3</sub>) δ 7.79 (d, *J* = 8.3 Hz, 2H), 7.62

(d, *J* = 8.1 Hz, 2H), 7.49 (s, 1H), 7.35-7.31 (m, 3H), 7.24 (d, *J* = 8.1 Hz, 2H), 6.98-6.93 (m, 2H), 6.45 (s, 1H), 4.64 (s, 2H), 4.35 (s, 2H), 4.05 (s, 3H), 2.78 (s, 3H), 2.44 (s, 6H); <sup>13</sup>C NMR (150 MHz, CDCl<sub>3</sub>) δ 147.4, 144.2, 142.9, 137.2, 135.6, 132.8, 132.4, 130.5, 129.9, 128.7, 127.8, 127.3, 125.4, 122.3, 121.5, 119.9, 118.9, 105.6, 45.2, 40.8, 33.1, 21.9, 21.6, 20.3; IR  $\nu_{\max}$  (KBr): 3155, 3049, 2926, 1592, 1392, 1331, 1155, 1091, 965, 750 cm<sup>-1</sup>; HRMS *m/z* calcd for C<sub>28</sub>H<sub>29</sub>N<sub>5</sub>NaO<sub>4</sub>S<sub>2</sub> [M+Na]<sup>+</sup>: 586.1559; found: 586.1559.

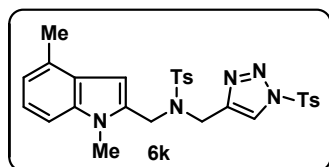

*N*-((1,4-dimethyl-1*H*-indol-2-yl)methyl)-4-methyl-*N*-((1-tosyl-

**1*H*-1,2,3-triazol-4-yl)methyl)benzenesulfonamide (6k)**: Yield:

96%; <sup>1</sup>H NMR (600 MHz, CDCl<sub>3</sub>) δ 7.84 (d, *J* = 8.3 Hz, 2H), 7.62

(d, *J* = 8.1 Hz, 2H), 7.54 (s, 1H), 7.35 (d, *J* = 8.3 Hz, 2H), 7.24 (d, *J* = 8.1 Hz, 2H), 7.19-7.14 (m, 2H), 6.92 (d, *J* = 6.2 Hz, 1H), 6.47 (s, 1H), 4.70 (s, 2H), 4.38 (s, 2H), 3.80 (s, 3H), 2.47 (s, 3H), 2.45 (s, 3H), 2.44 (s, 3H); <sup>13</sup>C NMR (150 MHz, CDCl<sub>3</sub>) δ 147.4, 144.2, 142.8, 138.0, 135.8, 132.8, 131.6, 130.5, 130.2, 129.8, 128.7, 127.2, 126.9, 122.4, 120.0, 107.0, 103.3, 44.7, 40.6, 30.1, 21.9, 21.6, 18.6; IR  $\nu_{\max}$  (KBr): 3417, 3134, 2923, 2357, 1592, 1392, 1347, 1195, 1165, 1089, 971, 675, 585 cm<sup>-1</sup>; HRMS *m/z* calcd for C<sub>28</sub>H<sub>29</sub>N<sub>5</sub>NaO<sub>4</sub>S<sub>2</sub> [M+Na]<sup>+</sup>:



586.1559; found: 586.1560.

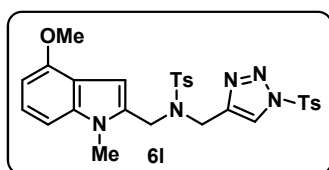

***N*-((4-methoxy-1-methyl-1*H*-indol-2-yl)methyl)-4-methyl-*N*-((1-tosyl-1*H*-1,2,3-triazol-4-yl)methyl)benzenesulfonamide**

**(6l):** Yield: 88%; <sup>1</sup>H NMR (600 MHz, CDCl<sub>3</sub>) δ 7.84 (d, *J* = 8.1 Hz, 2H), 7.60 (d, *J* = 8.0 Hz, 2H), 7.49 (s, 1H), 7.35 (d, *J* = 8.1

Hz, 2H), 7.22 (d, *J* = 8.0 Hz, 2H), 7.17 (t, *J* = 8.0 Hz, 1H), 6.92 (d, *J* = 8.2 Hz, 1H), 6.58 (s, 1H), 6.52 (d, *J* = 7.8 Hz, 1H), 4.66 (s, 2H), 4.34 (s, 2H), 3.90 (s, 3H), 3.75 (s, 3H), 2.44 (s, 3H), 2.42 (s, 3H); <sup>13</sup>C NMR (150 MHz, CDCl<sub>3</sub>) δ 153.2, 147.4, 144.1, 142.7, 139.7, 135.7, 132.9, 130.6, 130.5, 129.8, 128.7, 127.2, 123.2, 122.3, 117.6, 102.9, 102.1, 99.6, 55.3, 44.7, 40.4, 30.2, 21.9, 21.6; IR  $\nu_{\max}$  (KBr): 3135, 2930, 2836, 1582, 1501, 1391, 1352, 1258, 1195, 1165, 1089, 676 cm<sup>-1</sup>; HRMS *m/z* calcd for C<sub>28</sub>H<sub>29</sub>N<sub>5</sub>NaO<sub>5</sub>S<sub>2</sub> [M+Na]<sup>+</sup>: 602.1508; found: 602.1508.

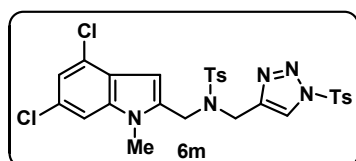

***N*-((4,6-dichloro-1-methyl-1*H*-indol-2-yl)methyl)-4-methyl-*N*-((1-tosyl-1*H*-1,2,3-triazol-4-**

**yl)methyl)benzenesulfonamide (6m):** Yield: 90%; <sup>1</sup>H NMR (600 MHz, CDCl<sub>3</sub>) δ 7.87 (d, *J* = 8.0 Hz, 2H), 7.61 (s, 1H), 7.58

(d, *J* = 7.9 Hz, 2H), 7.37 (d, *J* = 8.0 Hz, 2H), 7.23 (d, *J* = 7.9 Hz, 2H), 7.13 (s, 1H), 7.06 (s, 1H), 6.48 (s, 1H), 4.65 (s, 2H), 4.34 (s, 2H), 3.69 (s, 3H), 2.45 (s, 3H), 2.43 (s, 3H); <sup>13</sup>C NMR (150 MHz, CDCl<sub>3</sub>) δ 147.6, 144.5, 142.4, 138.8, 135.7, 134.0, 132.8, 130.6, 130.0, 128.8, 128.1, 127.2, 126.3, 124.6, 122.5, 120.1, 108.3, 103.3, 44.5, 40.7, 30.5, 22.0, 21.7; IR  $\nu_{\max}$  (KBr): 3380, 3154, 2920, 2359, 1387, 1337, 1195, 1163, 1089, 963, 667, 587 cm<sup>-1</sup>; HRMS *m/z* calcd for C<sub>27</sub>H<sub>25</sub>Cl<sub>2</sub>N<sub>5</sub>NaO<sub>4</sub>S<sub>2</sub> [M+Na]<sup>+</sup>: 640.0623; found: 640.0629.

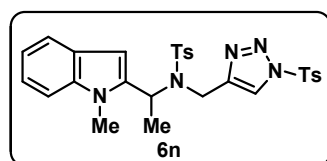

**4-methyl-*N*-(1-(1-methyl-1*H*-indol-2-yl)ethyl)-*N*-((1-tosyl-1*H*-1,2,3-triazol-4-yl)methyl)benzenesulfonamide (6n):** Yield: 56%;

<sup>1</sup>H NMR (600 MHz, CDCl<sub>3</sub>) δ 7.72 (d, *J* = 8.3 Hz, 2H), 7.63 (d, *J* = 8.4 Hz, 2H), 7.51 (d, *J* = 7.8 Hz, 1H), 7.30-7.26 (m, 4H), 7.25-

7.23 (m, 2H), 7.21 (d, *J* = 8.1 Hz, 1H), 7.12 (td, *J* = 7.8 Hz, 0.8 Hz, 1H), 6.47 (s, 1H), 5.58 (q, *J* = 6.9 Hz, 1H), 4.41 (d, *J* = 16.7 Hz, 1H), 4.26 (d, *J* = 16.7 Hz, 1H), 3.71 (s, 3H), 2.44 (s, 3H), 2.43

(s, 3H), 1.43 (d,  $J = 6.9$  Hz, 3H);  $^{13}\text{C}$  NMR (150 MHz,  $\text{CDCl}_3$ )  $\delta$  147.1, 145.1, 144.2, 137.8, 137.2, 137.1, 133.0, 130.4, 130.0, 128.7, 127.6, 126.8, 122.7, 122.1, 120.8, 119.9, 109.4, 102.4, 49.9, 38.2, 29.9, 21.9, 21.7, 16.3; IR  $\nu_{\text{max}}$  (KBr): 3153, 2982, 2926, 2359, 1592, 1467, 1389, 1331, 1196, 1090, 1009, 688, 583  $\text{cm}^{-1}$ ; HRMS  $m/z$  calcd for  $\text{C}_{28}\text{H}_{29}\text{N}_5\text{NaO}_4\text{S}_2$   $[\text{M}+\text{Na}]^+$ : 586.1559; found: 586.1559.

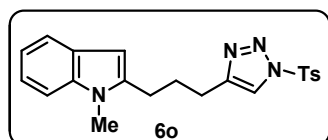

**1-methyl-2-(3-(1-tosyl-1H-1,2,3-triazol-4-yl)propyl)-1H-indole**

**(6o):** Yield: 71%;  $^1\text{H}$  NMR (600 MHz,  $\text{CDCl}_3$ )  $\delta$  7.99 (d,  $J = 8.1$  Hz, 2H), 7.90 (s, 1H), 7.56 (d,  $J = 7.8$  Hz, 1H), 7.37 (d,  $J = 8.1$  Hz,

2H), 7.28 (d,  $J = 8.2$  Hz, 1H), 7.19 (t,  $J = 7.5$  Hz, 1H), 7.10 (t,  $J = 7.5$  Hz, 1H), 6.28 (s, 1H), 3.63 (s, 3H), 2.86 (t,  $J = 7.5$  Hz, 2H), 2.81 (t,  $J = 7.5$  Hz, 2H), 2.44 (s, 3H), 2.15-2.09 (m, 2H);  $^{13}\text{C}$  NMR (150 MHz,  $\text{CDCl}_3$ )  $\delta$  147.6, 147.2, 140.0, 137.4, 133.2, 130.5, 128.6, 127.8, 120.7, 120.6, 119.8, 119.3, 108.9, 99.1, 29.5, 27.7, 26.1, 24.8, 21.8; IR  $\nu_{\text{max}}$  (film): 3437, 2918, 2849, 1594, 1467, 1389, 1193, 1179, 1091, 1009, 671  $\text{cm}^{-1}$ ; HRMS  $m/z$  calcd for  $\text{C}_{21}\text{H}_{23}\text{N}_4\text{O}_2\text{S}$   $[\text{M}+\text{H}]^+$ : 395.1542; found: 395.1544.

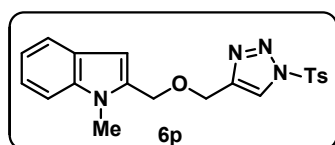

**1-methyl-2-(((1-tosyl-1H-1,2,3-triazol-4-yl)methoxy)methyl)-**

**1H-indole (6p):** Yield: 91%;  $^1\text{H}$  NMR (600 MHz,  $\text{CDCl}_3$ )  $\delta$  8.04 (s, 1H), 7.97 (d,  $J = 8.3$  Hz, 2H), 7.61 (d,  $J = 7.9$  Hz, 1H), 7.36

(d,  $J = 8.3$  Hz, 2H), 7.32 (d,  $J = 8.2$  Hz, 1H), 7.25 (dd,  $J = 7.8$  Hz, 7.2 Hz, 1H), 7.12 (t,  $J = 7.4$  Hz, 1H), 6.52 (s, 1H), 4.75 (s, 2H), 4.63 (s, 2H), 3.74 (s, 3H), 2.44 (s, 3H);  $^{13}\text{C}$  NMR (150 MHz,  $\text{CDCl}_3$ )  $\delta$  147.5, 144.9, 138.2, 134.8, 132.9, 130.5, 128.8, 127.1, 122.4, 122.2, 120.9, 119.6, 109.3, 103.6, 64.8, 62.2, 29.9, 21.9; IR  $\nu_{\text{max}}$  (KBr): 3141, 2926, 1928, 1590, 1471, 1385, 1193, 1172, 1085, 673, 584  $\text{cm}^{-1}$ ; HRMS  $m/z$  calcd for  $\text{C}_{20}\text{H}_{20}\text{N}_4\text{NaO}_3\text{S}$   $[\text{M}+\text{Na}]^+$ : 419.1154; found: 419.1151.

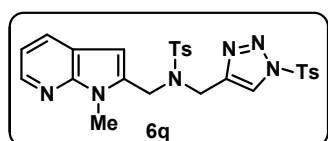

**4-methyl-N-((1-methyl-1H-pyrrolo[2,3-b]pyridin-2-yl)methyl)-**

**N-((1-tosyl-1H-1,2,3-triazol-4-yl)methyl)benzenesulfonamide**

**(6q):** Yield: 79%;  $^1\text{H}$  NMR (600 MHz,  $\text{CDCl}_3$ )  $\delta$  8.31 (d,  $J = 4.6$

Hz, 1H), 7.88 (d,  $J = 8.0$  Hz, 2H), 7.78 (d,  $J = 7.8$  Hz, 1H), 7.59 (d,  $J = 7.9$  Hz, 2H), 7.58 (s, 1H), 7.36 (d,  $J = 8.0$  Hz, 2H), 7.21 (d,  $J = 7.9$  Hz, 2H), 7.02 (dd,  $J = 7.5$  Hz, 4.8 Hz, 1H), 6.45 (s, 1H),

4.68 (s, 2H), 4.36 (s, 2H), 3.84 (s, 3H), 2.44 (s, 3H), 2.41 (s, 3H);  $^{13}\text{C}$  NMR (150 MHz,  $\text{CDCl}_3$ )  $\delta$  149.0, 147.6, 144.4, 143.4, 142.4, 135.9, 133.1, 132.8, 130.6, 129.9, 128.8, 128.6, 127.3, 122.6, 119.7, 116.1, 102.6, 44.6, 40.7, 28.5, 21.9, 21.6; IR  $\nu_{\text{max}}$  (KBr): 3140, 3028, 2359, 1596, 1458, 1391, 1355, 1311, 1196, 1166, 1088, 811, 688, 585  $\text{cm}^{-1}$ ; HRMS  $m/z$  calcd for  $\text{C}_{26}\text{H}_{27}\text{N}_6\text{O}_4\text{S}_2$   $[\text{M}+\text{H}]^+$ : 551.1535; found: 551.1539.

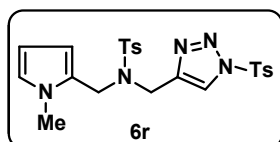

**4-methyl-*N*-((1-methyl-1*H*-pyrrol-2-yl)methyl)-*N*-((1-tosyl-1*H*-1,2,3-triazol-4-yl)methyl)benzenesulfonamide (6r)**: Yield: 77%;  $^1\text{H}$  NMR (400 MHz,  $\text{CDCl}_3$ )  $\delta$  7.92 (d,  $J = 8.2$  Hz, 2H), 7.62 (d,  $J = 8.0$

Hz, 2H), 7.38 (d,  $J = 8.0$  Hz, 2H), 7.36 (s, 1H), 7.25 (d,  $J = 7.8$  Hz, 2H), 6.45 (s, 1H), 6.01 (s, 1H), 5.90 (s, 1H), 4.38 (s, 2H), 4.28 (s, 2H), 3.51 (s, 3H), 2.44 (s, 3H), 2.41 (s, 3H);  $^{13}\text{C}$  NMR (100 MHz,  $\text{CDCl}_3$ )  $\delta$  147.4, 144.0, 143.4, 135.7, 133.0, 130.4, 129.9, 128.7, 127.2, 124.7, 123.9, 122.1, 111.7, 107.1, 44.7, 41.2, 33.8, 21.9, 21.6; IR  $\nu_{\text{max}}$  (film): 3146, 2924, 2854, 1595, 1395, 1335, 1195, 1161, 1091, 1009, 814, 670  $\text{cm}^{-1}$ ; HRMS  $m/z$  calcd for  $\text{C}_{23}\text{H}_{25}\text{N}_5\text{NaO}_4\text{S}_2$   $[\text{M}+\text{Na}]^+$ : 522.1246; found: 522.1244.

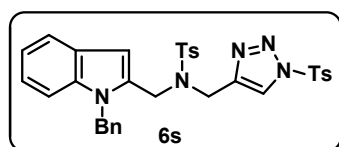

***N*-((1-benzyl-1*H*-indol-2-yl)methyl)-4-methyl-*N*-((1-tosyl-1*H*-1,2,3-triazol-4-yl)methyl)benzenesulfonamide (6s)**: Yield: 95%;  $^1\text{H}$  NMR (600 MHz,  $\text{CDCl}_3$ )  $\delta$  7.86 (d,  $J = 8.4$  Hz, 2H), 7.59-7.56

(m, 2H), 7.53 (d,  $J = 8.3$  Hz, 2H), 7.35 (d,  $J = 8.3$  Hz, 2H), 7.28 (d,  $J = 8.3$  Hz, 1H), 7.26-7.19 (m, 4H), 7.18 (d,  $J = 8.1$  Hz, 2H), 7.13 (t,  $J = 7.6$  Hz, 1H), 6.97 (dd,  $J = 7.8$  Hz, 1.5 Hz, 2H), 6.62 (s, 1H), 5.50 (s, 2H), 4.60 (s, 2H), 4.35 (s, 2H), 2.44 (s, 3H), 2.41 (s, 3H);  $^{13}\text{C}$  NMR (150 MHz,  $\text{CDCl}_3$ )  $\delta$  147.4, 144.1, 142.7, 138.2, 137.8, 135.8, 132.9, 132.2, 130.5, 129.8, 128.7, 127.3, 127.2, 126.1, 122.6, 122.5, 120.9, 120.0, 110.1, 105.7, 46.4, 44.5, 40.7, 21.9, 21.5; IR  $\nu_{\text{max}}$  (KBr): 3137, 3029, 2930, 1595, 1390, 1330, 1197, 1163, 1091, 897, 676, 583  $\text{cm}^{-1}$ ; HRMS  $m/z$  calcd for  $\text{C}_{33}\text{H}_{31}\text{N}_5\text{NaO}_4\text{S}_2$   $[\text{M}+\text{Na}]^+$ : 648.1715; found: 648.1719.

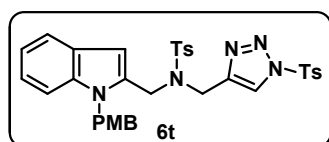

***N*-((1-(4-methoxybenzyl)-1*H*-indol-2-yl)methyl)-4-methyl-*N*-**

**((1-tosyl-1*H*-1,2,3-triazol-4-yl)methyl)benzenesulfonamide (6t):** Yield: 92%; <sup>1</sup>H NMR (600 MHz, CDCl<sub>3</sub>) δ 7.84 (d, *J* = 8.5 Hz, 2H), 7.57 (s, 1H), 7.56 (d, *J* = 8.0 Hz, 1H), 7.54 (d, *J* = 8.3 Hz, 2H), 7.34 (d, *J* = 8.3 Hz, 2H), 7.29 (d, *J* = 8.3 Hz, 1H), 7.21 (td, *J* = 7.2 Hz, 0.9 Hz, 1H), 7.18 (d, *J* = 8.1 Hz, 2H), 7.12 (t, *J* = 7.2 Hz, 1H), 6.92 (d, *J* = 8.7 Hz, 2H), 6.78 (d, *J* = 8.7 Hz, 2H), 6.58 (s, 1H), 5.42 (s, 2H), 4.58 (s, 2H), 4.35 (s, 2H), 3.75 (s, 3H); 2.44 (s, 3H), 2.41 (s, 3H); <sup>13</sup>C NMR (150 MHz, CDCl<sub>3</sub>) δ 158.9, 147.4, 144.1, 142.7, 138.2, 135.8, 132.9, 132.2, 130.5, 129.9, 129.8, 128.7, 127.4, 127.3, 127.3, 122.6, 122.5, 120.8, 120.0, 114.1, 110.1, 105.7, 55.3, 45.9, 44.6, 40.8, 21.9, 21.6; IR ν<sub>max</sub> (KBr): 3418, 3164, 2932, 2359, 1595, 1513, 1395, 1337, 1155, 1089, 674, 582 cm<sup>-1</sup>; HRMS *m/z* calcd for C<sub>34</sub>H<sub>33</sub>N<sub>5</sub>NaO<sub>5</sub>S<sub>2</sub> [M+Na]<sup>+</sup>: 678.1821; found: 678.1819.

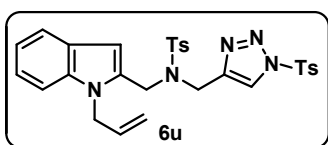

***N*-((1-allyl-1*H*-indol-2-yl)methyl)-4-methyl-*N*-((1-tosyl-1*H*-1,2,3-triazol-4-yl)methyl)benzenesulfonamide (6u):** Yield: 78%; <sup>1</sup>H NMR (600 MHz, CDCl<sub>3</sub>) δ 7.84 (d, *J* = 8.4 Hz, 2H), 7.60 (d, *J* = 8.3 Hz, 2H), 7.56 (s, 1H), 7.53 (d, *J* = 7.8 Hz, 1H), 7.34 (d, *J* = 8.3 Hz, 2H), 7.29 (d, *J* = 8.3 Hz, 1H), 7.24-7.21 (m, 3H), 7.11 (t, *J* = 7.7 Hz, 1H), 6.53 (s, 1H), 5.97-5.90 (m, 1H), 5.10 (dd, *J* = 10.3 Hz, 1.1 Hz, 1H), 4.89-4.86 (m, 2H), 4.85 (dd, *J* = 17.1 Hz, 1.0 Hz, 1H), 4.64 (s, 2H), 4.38 (s, 2H), 2.44 (s, 3H), 2.43 (s, 3H); <sup>13</sup>C NMR (150 MHz, CDCl<sub>3</sub>) δ 147.4, 144.2, 142.6, 137.8, 135.8, 133.5, 132.9, 131.9, 130.5, 129.8, 128.7, 127.3, 122.5, 122.4, 120.8, 119.9, 116.3, 109.9, 105.3, 45.4, 44.5, 40.7, 21.9, 21.6; IR ν<sub>max</sub> (KBr): 3393, 3137, 2922, 2359, 2330, 1595, 1461, 1394, 1201, 1162, 673, 584 cm<sup>-1</sup>; HRMS *m/z* calcd for C<sub>29</sub>H<sub>29</sub>N<sub>5</sub>NaO<sub>4</sub>S<sub>2</sub> [M+Na]<sup>+</sup>: 598.1559; found: 598.1559.

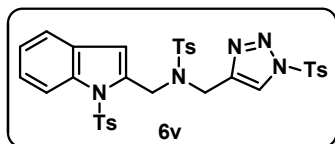

**4-methyl-*N*-((1-tosyl-1*H*-1,2,3-triazol-4-yl)methyl)-*N*-((1-tosyl-1*H*-indol-2-yl)methyl)benzenesulfonamide (6v):** Yield: 86%; <sup>1</sup>H NMR (600 MHz, CDCl<sub>3</sub>) δ 8.01 (d, *J* = 8.4 Hz, 1H), 7.86 (d, *J* = 8.4 Hz, 2H), 7.79 (s, 1H), 7.65 (d, *J* = 8.2 Hz, 2H), 7.57 (d, *J* = 8.4 Hz, 2H), 7.35 (d, *J* = 7.7 Hz, 1H), 7.27 (d, *J* = 8.4 Hz, 2H), 7.26-7.22 (m, 3H), 7.19 (t, *J* = 7.6 Hz, 1H), 7.14 (d, *J* = 8.2 Hz, 2H), 6.55 (s, 1H), 4.91 (s, 2H), 4.61 (s, 2H), 2.42 (s, 3H), 2.40 (s, 3H), 2.30 (s, 3H); <sup>13</sup>C NMR (150 MHz, CDCl<sub>3</sub>) δ 147.5, 145.2, 144.3, 142.8, 137.4, 136.8, 136.1, 135.2, 132.9, 130.6, 130.1, 129.9, 129.4, 128.7, 127.4, 126.5, 124.7, 123.9, 123.0, 120.9, 114.6, 111.4, 46.6, 42.8, 21.9, 21.6; IR ν<sub>max</sub> (KBr): 3420, 3148, 3066, 2922, 2361, 2332, 1595, 1451, 1373, 1341, 1147, 1090 cm<sup>-1</sup>.

<sup>1</sup>; HRMS m/z calcd for C<sub>33</sub>H<sub>32</sub>N<sub>5</sub>O<sub>6</sub>S<sub>3</sub> [M+H]<sup>+</sup>: 690.1515; found: 690.1516.

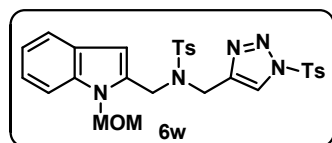

*N*-((1-(methoxymethyl)-1*H*-indol-2-yl)methyl)-4-methyl-*N*-((1-tosyl-1*H*-1,2,3-triazol-4-yl)methyl)benzenesulfonamide (**6w**):

Yield: 87%; <sup>1</sup>H NMR (400 MHz, CDCl<sub>3</sub>) δ 7.80 (d, *J* = 8.4 Hz, 2H), 7.63 (s, 1H), 7.59 (d, *J* = 8.2 Hz, 2H), 7.48 (d, *J* = 7.8 Hz, 1H), 7.43 (d, *J* = 8.3 Hz, 1H), 7.31 (d, *J* = 8.2 Hz, 2H), 7.25-7.19 (m, 3H), 7.11 (t, *J* = 7.5 Hz, 1H), 6.51 (s, 1H), 5.56 (s, 2H), 4.69 (s, 2H), 4.37 (s, 2H), 3.29 (s, 3H), 2.42 (s, 3H), 2.41 (s, 3H); <sup>13</sup>C NMR (100 MHz, CDCl<sub>3</sub>) δ 147.4, 144.3, 142.7, 138.4, 135.8, 132.8, 132.3, 130.5, 129.9, 128.7, 127.4, 127.3, 123.0, 122.6, 120.9, 120.6, 110.0, 106.7, 74.0, 55.9, 44.5, 41.0, 21.9, 21.6; IR  $\nu_{\max}$  (film): 3056, 2928, 2357, 1595, 1460, 1395, 1342, 1195, 1160, 1091, 1010, 740 cm<sup>-1</sup>; HRMS m/z calcd for C<sub>28</sub>H<sub>29</sub>N<sub>5</sub>NaO<sub>5</sub>S<sub>2</sub> [M+Na]<sup>+</sup>: 602.1508; found: 602.1506.

#### 4. General Procedures for Rhodium(II)-Catalyzed Intramolecular Annulation of 1-Sulfonyl-1,2,3-Triazoles with Indoles

A 10 mL pressure tube, fitted with a rubber septum, was charged with triazole (0.20 mmol, 1.0 equiv.), Rh<sub>2</sub>(OOct)<sub>4</sub> (1.6 mg, 0.002 mmol, 0.01 equiv.). The reaction vessel was added freshly distilled 1,2-dichloroethane (1.0 mL) and then was sealed with a teflon screwcap and placed in an oil bath preheated to 140 °C. The resulting solution was heated at this temperature for 5 min, then NaBH<sub>3</sub>CN (25.1 mg, 0.4 mmol, 2.0 equiv.) was added, and the reaction mixture was stirred at 80 °C for 3 h. After the mixture was cooled to room temperature, the solvent was removed under reduced pressure and the residue was purified by flash column chromatography (eluent: petroleum ether/EtOAc) to give the product **11a-11w**.

#### 5. Analysis Data of Annulation Products

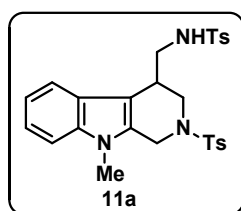

**4-methyl-N-((9-methyl-2-tosyl-2,3,4,9-tetrahydro-1H-pyrido[3,4-**

**b]indol-4-yl)methyl)benzenesulfonamide (11a):** Yield: 86%; <sup>1</sup>H NMR (600 MHz, CDCl<sub>3</sub>) δ 7.77 (d, *J* = 8.3 Hz, 2H), 7.75 (d, *J* = 8.3 Hz, 2H), 7.53 (d, *J* = 7.8 Hz, 1H), 7.38 (d, *J* = 8.1 Hz, 2H), 7.27 (d, *J* = 8.0 Hz, 2H),

7.25 (d, *J* = 8.2 Hz, 1H), 7.20 (td, *J* = 8.0 Hz, 0.9 Hz, 1H), 7.11 (td, *J* = 8.0 Hz, 0.8 Hz, 1H), 5.10 (t, *J* = 6.5 Hz, 1H), 4.68 (d, *J* = 14.4 Hz, 1H), 4.00 (dd, *J* = 12.3 Hz, 2.2 Hz, 1H), 3.91 (d, *J* = 14.3 Hz, 1H), 3.56 (s, 3H), 3.40-3.32 (m, 2H), 3.13 (ddd, *J* = 13.8 Hz, 9.2 Hz, 5.8 Hz, 1H), 2.84 (dd, *J* = 12.3 Hz, 3.4 Hz, 1H), 2.45 (s, 3H), 2.40 (s, 3H); <sup>13</sup>C NMR (150 MHz, CDCl<sub>3</sub>) δ 144.2, 143.4, 137.3, 137.2, 133.9, 130.9, 130.1, 129.8, 127.5, 127.1, 125.7, 121.9, 119.9, 118.4, 109.1, 108.0, 46.0, 44.9, 43.0, 34.1, 29.6, 21.7, 21.6; IR ν<sub>max</sub> (KBr): 3273, 2922, 2851, 2359, 2330, 1718, 1348, 1325, 1163, 1154, 1088, 753, 683, 547 cm<sup>-1</sup>; HRMS *m/z* calcd for C<sub>27</sub>H<sub>29</sub>N<sub>3</sub>NaO<sub>4</sub>S<sub>2</sub> [M+Na]<sup>+</sup>: 546.1497; found: 546.1498.

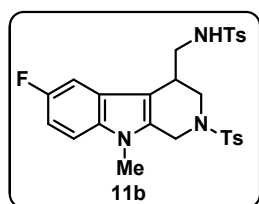

**N-((6-fluoro-9-methyl-2-tosyl-2,3,4,9-tetrahydro-1H-pyrido[3,4-**

**b]indol-4-yl)methyl)-4-methylbenzenesulfonamide (11b):** Yield: 82%; <sup>1</sup>H NMR (600 MHz, CDCl<sub>3</sub>) δ 7.76 (d, *J* = 8.2 Hz, 2H), 7.75 (d, *J* = 8.2 Hz, 2H), 7.38 (d, *J* = 8.1 Hz, 2H), 7.29 (d, *J* = 8.1 Hz, 2H), 7.15 (dd, *J* =

8.9 Hz, 4.2 Hz, 1H), 7.10 (dd,  $J = 9.2$  Hz, 2.4 Hz, 1H), 6.93 (td,  $J = 9.0$  Hz, 2.4 Hz, 1H), 4.94 (t,  $J = 6.3$  Hz, 1H), 4.64 (d,  $J = 14.5$  Hz, 1H), 3.97 (dd,  $J = 12.4$  Hz, 2.6 Hz, 1H), 3.92 (d,  $J = 14.5$  Hz, 1H), 3.56 (s, 3H), 3.35-3.31 (m, 1H), 3.28 (ddd,  $J = 13.8$  Hz, 7.2 Hz, 4.2 Hz, 1H), 3.10 (ddd,  $J = 14.1$  Hz, 9.3 Hz, 5.7 Hz, 1H), 2.87 (dd,  $J = 12.4$  Hz, 3.4 Hz, 1H), 2.45 (s, 3H), 2.41 (s, 3H);  $^{13}\text{C}$  NMR (150 MHz,  $\text{CDCl}_3$ )  $\delta$  158.1 (d,  $J = 236.3$  Hz), 144.3, 143.7, 137.0, 133.9, 133.9, 132.7, 130.2, 129.9, 127.5, 127.2, 125.9 (d,  $J = 9.7$  Hz), 110.2 (d,  $J = 26.3$  Hz), 109.8 (d,  $J = 9.7$  Hz), 108.0 (d,  $J = 4.5$  Hz), 103.5 (d,  $J = 23.6$  Hz), 46.0, 44.6, 43.1, 34.1, 29.9, 21.7, 21.6; IR  $\nu_{\text{max}}$  (KBr): 3420, 3282, 2361, 1487, 1339, 1160, 1089, 731, 552  $\text{cm}^{-1}$ ; HRMS  $m/z$  calcd for  $\text{C}_{27}\text{H}_{28}\text{FN}_3\text{NaO}_4\text{S}_2$   $[\text{M}+\text{Na}]^+$ : 564.1403; found: 564.1401.

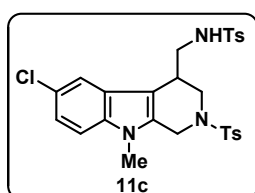

***N*-((6-chloro-9-methyl-2-tosyl-2,3,4,9-tetrahydro-1*H*-pyrido[3,4-*b*]indol-4-yl)methyl)-4-methylbenzenesulfonamide (11c):** Yield: 77%;  $^1\text{H}$  NMR (600 MHz,  $\text{CDCl}_3$ )  $\delta$  7.78-7.74 (m, 4H), 7.41-7.36 (m, 3H), 7.31 (d,  $J = 7.9$  Hz, 2H), 7.16-7.12 (m, 2H), 4.93 (t,  $J = 6.2$  Hz,

1H), 4.64 (d,  $J = 14.6$  Hz, 1H), 3.98 (dd,  $J = 12.5$  Hz, 1.9 Hz, 1H), 3.92 (d,  $J = 14.6$  Hz, 1H), 3.56 (s, 3H), 3.36-3.32 (m, 1H), 3.29-3.24 (m, 1H), 3.10 (ddd,  $J = 13.9$  Hz, 9.4 Hz, 5.8 Hz, 1H), 2.86 (dd,  $J = 12.4$  Hz, 3.2 Hz, 1H), 2.45 (s, 3H), 2.42 (s, 3H);  $^{13}\text{C}$  NMR (150 MHz,  $\text{CDCl}_3$ )  $\delta$  144.3, 143.7, 136.8, 135.7, 133.8, 132.5, 130.2, 130.0, 127.5, 127.2, 126.6, 125.8, 122.2, 117.8, 110.2, 107.7, 45.9, 44.6, 43.0, 33.8, 29.8, 21.7, 21.7; IR  $\nu_{\text{max}}$  (KBr): 3420, 3292, 2924, 2363, 1597, 1475, 1339, 1158, 1089, 814, 713, 553  $\text{cm}^{-1}$ ; HRMS  $m/z$  calcd for  $\text{C}_{27}\text{H}_{28}\text{ClN}_3\text{NaO}_4\text{S}_2$   $[\text{M}+\text{Na}]^+$ : 580.1107; found: 580.1111.

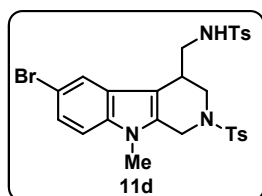

***N*-((6-bromo-9-methyl-2-tosyl-2,3,4,9-tetrahydro-1*H*-pyrido[3,4-*b*]indol-4-yl)methyl)-4-methylbenzenesulfonamide (11d):** Yield: 83%;  $^1\text{H}$  NMR (600 MHz,  $\text{CDCl}_3$ )  $\delta$  7.78-7.74 (m, 4H), 7.57 (d,  $J = 1.7$  Hz, 1H), 7.38 (d,  $J = 8.1$  Hz, 2H), 7.32 (d,  $J = 8.1$  Hz, 2H), 7.26 (dd,  $J = 8.7$  Hz, 1.7 Hz, 1H), 7.10 (d,  $J = 8.7$  Hz, 1H), 4.94 (t,  $J = 6.4$  Hz, 1H), 4.65 (d,  $J = 14.5$  Hz, 1H), 3.99 (dd,  $J = 12.5$  Hz, 2.6 Hz, 1H), 3.91 (d,  $J = 14.3$  Hz, 1H), 3.55 (s, 3H), 3.36-3.32 (m, 1H), 3.26 (ddd,  $J = 13.9$  Hz, 7.0 Hz, 4.1 Hz, 1H), 3.09 (ddd,  $J = 14.4$  Hz, 9.6 Hz, 5.9 Hz, 1H), 2.85 (dd,  $J = 12.5$  Hz, 3.4 Hz, 1H), 2.45 (s, 3H), 2.42 (s, 3H);  $^{13}\text{C}$  NMR (150 MHz,  $\text{CDCl}_3$ )  $\delta$  144.3, 143.7,

136.8, 136.0, 133.9, 132.4, 130.2, 130.0, 127.5, 127.3, 127.3, 124.8, 120.9, 113.3, 110.6, 107.7, 45.9, 44.7, 43.0, 33.8, 29.8, 21.7, 21.7; IR  $\nu_{\max}$  (KBr): 3389, 3292, 2924, 2361, 2332, 1473, 1340, 1158, 1089  $\text{cm}^{-1}$ ; HRMS  $m/z$  calcd for  $\text{C}_{27}\text{H}_{28}\text{BrN}_3\text{NaO}_4\text{S}_2$   $[\text{M}+\text{Na}]^+$ : 624.0602; found: 624.0604.

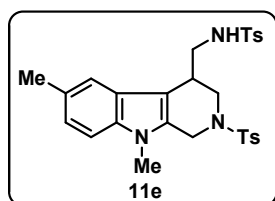

***N*-((6,9-dimethyl-2-tosyl-2,3,4,9-tetrahydro-1*H*-pyrido[3,4-*b*]indol-4-yl)methyl)-4-methylbenzenesulfonamide (6e):** Yield: 88%;  $^1\text{H}$

NMR (600 MHz,  $\text{CDCl}_3$ )  $\delta$  7.78-7.75 (m, 4H), 7.37 (d,  $J = 8.1$  Hz, 2H), 7.30-7.27 (m, 3H), 7.13 (d,  $J = 8.3$  Hz, 1H), 7.02 (dd,  $J = 8.3$  Hz, 1.0

Hz, 1H), 5.06 (dd,  $J = 6.9$  Hz, 5.8 Hz, 1H), 4.65 (d,  $J = 14.3$  Hz, 1H), 3.98 (dd,  $J = 12.5$  Hz, 2.1 Hz, 1H), 3.91 (d,  $J = 14.3$  Hz, 1H), 3.54 (s, 3H), 3.38-3.31 (m, 2H), 3.12 (ddd,  $J = 15.1$  Hz, 10.6 Hz, 7.7 Hz, 1H), 2.85 (dd,  $J = 12.4$  Hz, 3.2 Hz, 1H), 2.45 (s, 3H), 2.44 (s, 3H), 2.41 (s, 3H);  $^{13}\text{C}$  NMR (150 MHz,  $\text{CDCl}_3$ )  $\delta$  144.2, 143.4, 137.1, 135.7, 133.9, 131.0, 130.1, 129.8, 129.2, 127.5, 127.2, 125.8, 123.5, 118.1, 108.9, 107.4, 46.0, 44.9, 43.1, 34.0, 29.6, 21.7, 21.6, 21.5; IR  $\nu_{\max}$  (KBr): 3293, 2921, 2359, 2325, 1597, 1332, 1159, 1089, 814, 668, 549  $\text{cm}^{-1}$ ; HRMS  $m/z$  calcd for  $\text{C}_{28}\text{H}_{31}\text{N}_3\text{NaO}_4\text{S}_2$   $[\text{M}+\text{Na}]^+$ : 560.1654; found: 560.1659.

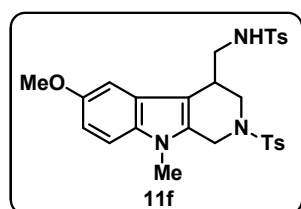

***N*-((6-methoxy-9-methyl-2-tosyl-2,3,4,9-tetrahydro-1*H*-pyrido[3,4-*b*]indol-4-yl)methyl)-4-methylbenzenesulfonamide (11f):** Yield: 80%;  $^1\text{H}$  NMR (600 MHz,  $\text{CDCl}_3$ )  $\delta$  7.76 (d,  $J = 8.0$

Hz, 2H), 7.74 (d,  $J = 8.1$  Hz, 2H), 7.37 (d,  $J = 8.1$  Hz, 2H), 7.27 (d,  $J = 8.4$  Hz, 2H), 7.13 (d,  $J = 8.8$  Hz, 1H), 7.03 (d,  $J = 2.3$  Hz, 1H), 6.84 (dd,  $J = 8.8$  Hz, 2.3 Hz, 1H), 5.05 (t,  $J = 6.5$  Hz, 1H), 4.67 (d,  $J = 14.4$  Hz, 1H), 4.00 (dd,  $J = 12.4$  Hz, 2.1 Hz, 1H), 3.87-

3.84 (m, 4H), 3.54 (s, 3H), 3.39-3.35 (m, 1H), 3.33-3.28 (m, 1H), 3.14 (ddd,  $J = 14.1$  Hz, 9.1 Hz, 6.2 Hz, 1H), 2.82 (dd,  $J = 12.3$  Hz, 3.4 Hz, 1H), 2.45 (s, 3H), 2.40 (s, 3H);  $^{13}\text{C}$  NMR (150 MHz,  $\text{CDCl}_3$ )  $\delta$  154.5, 144.2, 143.5, 137.2, 133.9, 132.5, 131.3, 130.1, 129.9, 127.5, 127.1, 126.1, 112.0, 109.9, 107.7, 100.4, 56.0, 46.1, 45.1, 43.1, 34.2, 29.7, 21.7, 21.6; IR  $\nu_{\max}$  (KBr): 3428, 3303, 2926, 1596, 1487, 1330, 1160, 1089, 816, 730, 552  $\text{cm}^{-1}$ ; HRMS  $m/z$  calcd for  $\text{C}_{28}\text{H}_{31}\text{N}_3\text{NaO}_5\text{S}_2$   $[\text{M}+\text{Na}]^+$ : 576.1603; found: 576.1605.



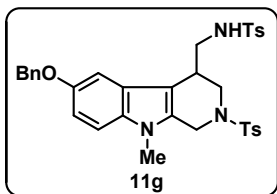

***N*-((6-(benzyloxy)-9-methyl-2-tosyl-2,3,4,9-tetrahydro-1*H*-**

**pyrido[3,4-*b*]indol-4-yl)methyl)-4-methylbenzenesulfonamide (11g):**

Yield: 76%;  $^1\text{H NMR}$  (600 MHz,  $\text{CDCl}_3$ )  $\delta$  7.78-7.71 (m, 4H), 7.50 (d,  $J = 7.3$  Hz, 2H), 7.41-7.35 (m, 4H), 7.32 (t,  $J = 7.3$  Hz, 1H), 7.25 (d,  $J = 7.3$  Hz, 2H), 7.15-7.11 (m, 2H), 6.92 (d,  $J = 8.7$  Hz, 1H), 5.10 (s, 2H), 4.98 (t,  $J = 5.9$  Hz, 1H), 4.66 (d,  $J = 14.4$  Hz, 1H), 3.98 (d,  $J = 12.3$  Hz, 1H), 3.86 (d,  $J = 14.4$  Hz, 1H), 3.53 (s, 3H), 3.37-3.28 (m, 2H), 3.17-3.10 (m, 1H), 2.82 (d,  $J = 12.2$  Hz, 1H), 2.44 (s, 3H), 2.36 (s, 3H);  $^{13}\text{C NMR}$  (150 MHz,  $\text{CDCl}_3$ )  $\delta$  153.6, 144.2, 143.5, 137.6, 137.1, 133.8, 132.6, 131.4, 130.1, 129.9, 128.7, 127.9, 127.8, 127.5, 127.1, 126.0, 112.6, 109.9, 107.6, 101.9, 70.9, 46.1, 45.0, 43.1, 34.1, 29.7, 21.7, 21.6; IR  $\nu_{\text{max}}$  (KBr): 3299, 2925, 2862, 1597, 1484, 1340, 1161, 1088, 923, 676, 551  $\text{cm}^{-1}$ ; HRMS  $m/z$  calcd for  $\text{C}_{34}\text{H}_{35}\text{N}_3\text{NaO}_5\text{S}_2$   $[\text{M}+\text{Na}]^+$ : 652.1916; found: 652.1918.

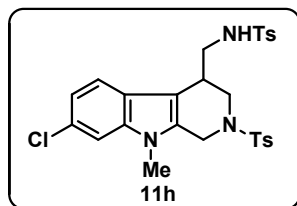

***N*-((7-chloro-9-methyl-2-tosyl-2,3,4,9-tetrahydro-1*H*-pyrido[3,4-*b*]indol-4-yl)methyl)-4-methylbenzenesulfonamide (11h):** Yield:

75%;  $^1\text{H NMR}$  (600 MHz,  $\text{CDCl}_3$ )  $\delta$  7.75 (d,  $J = 8.3$  Hz, 2H), 7.73 (d,  $J = 8.3$  Hz, 2H), 7.43 (d,  $J = 8.4$  Hz, 1H), 7.38 (d,  $J = 8.1$  Hz, 2H), 7.28 (d,  $J = 8.1$  Hz, 2H), 7.23 (d,  $J = 1.6$  Hz, 1H), 7.07 (dd,  $J = 8.4$  Hz, 1.7 Hz, 1H), 4.96 (t,  $J = 6.4$  Hz, 1H), 4.67 (d,  $J = 14.5$  Hz, 1H), 4.00 (dd,  $J = 12.4$  Hz, 2.1 Hz, 1H), 3.88 (d,  $J = 14.5$  Hz, 1H), 3.54 (s, 3H), 3.38-3.34 (m, 1H), 3.29 (ddd,  $J = 13.8$  Hz, 7.0 Hz, 4.6 Hz, 1H), 3.11 (ddd,  $J = 14.2$  Hz, 9.4 Hz, 6.1 Hz, 1H), 2.82 (dd,  $J = 12.4$  Hz, 3.4 Hz, 1H), 2.45 (s, 3H), 2.41 (s, 3H);  $^{13}\text{C NMR}$  (150 MHz,  $\text{CDCl}_3$ )  $\delta$  144.3, 143.6, 137.8, 137.2, 134.0, 131.7, 130.2, 129.9, 128.1, 127.5, 127.1, 124.3, 120.7, 119.3, 109.3, 108.4, 45.9, 44.9, 43.0, 34.1, 29.8, 21.7, 21.6; IR  $\nu_{\text{max}}$  (KBr): 3334, 2919, 2848, 1647, 1479, 1326, 1158, 1088, 943, 813, 669, 572  $\text{cm}^{-1}$ ; HRMS  $m/z$  calcd for  $\text{C}_{27}\text{H}_{28}\text{ClN}_3\text{NaO}_4\text{S}_2$   $[\text{M}+\text{Na}]^+$ : 580.1107; found: 580.1109.

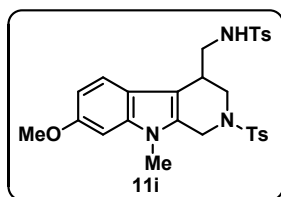

***N*-((7-methoxy-9-methyl-2-tosyl-2,3,4,9-tetrahydro-1*H*-pyrido[3,4-*b*]indol-4-yl)methyl)-4-methylbenzenesulfonamide (11i):** Yield:

78%;  $^1\text{H NMR}$  (600 MHz,  $\text{CDCl}_3$ )  $\delta$  7.75 (d,  $J = 8.3$  Hz, 2H), 7.74 (d,  $J = 8.3$  Hz, 2H), 7.39-7.36 (m, 3H), 7.27 (d,  $J = 8.1$  Hz, 2H), 6.76 (dd,  $J = 8.7$  Hz, 2.3 Hz, 1H), 6.71 (d,  $J = 2.3$  Hz, 1H), 4.95 (dd,  $J = 6.9$  Hz, 5.8 Hz, 1H), 4.62 (d,  $J =$

14.2 Hz, 1H), 3.94 (dd,  $J = 12.4$  Hz, 2.1 Hz, 1H), 3.90 (d,  $J = 14.2$  Hz, 1H), 3.86 (s, 3H), 3.51 (s, 3H), 3.36-3.29 (m, 2H), 3.16-3.10 (m, 1H), 2.85 (dd,  $J = 12.2$  Hz, 3.2 Hz, 1H), 2.45 (s, 3H), 2.40 (s, 3H);  $^{13}\text{C}$  NMR (150 MHz,  $\text{CDCl}_3$ )  $\delta$  156.6, 144.2, 143.5, 138.1, 137.2, 134.0, 130.1, 129.9, 129.7, 127.5, 127.1, 120.1, 119.0, 109.3, 107.8, 93.4, 55.9, 46.0, 45.0, 43.0, 34.1, 29.7, 21.7, 21.6; IR  $\nu_{\text{max}}$  (KBr): 3285, 2922, 1623, 1597, 1330, 1164, 1088, 950, 669, 553  $\text{cm}^{-1}$ ; HRMS  $m/z$  calcd for  $\text{C}_{28}\text{H}_{31}\text{N}_3\text{NaO}_5\text{S}_2$   $[\text{M}+\text{Na}]^+$ : 576.1603; found: 576.1603.

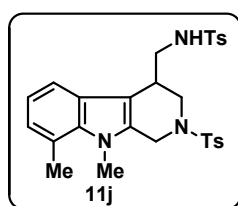

***N*-((8,9-dimethyl-2-tosyl-2,3,4,9-tetrahydro-1*H*-pyrido[3,4-*b*]indol-4-yl)methyl)-4-methylbenzenesulfonamide (11j):** Yield: 79%;  $^1\text{H}$  NMR (600 MHz,  $\text{CDCl}_3$ )  $\delta$  7.76 (d,  $J = 8.2$  Hz, 2H), 7.75 (d,  $J = 8.2$  Hz, 2H), 7.39-7.36 (m, 3H), 7.27 (d,  $J = 8.1$  Hz, 2H), 6.98 (t,  $J = 7.5$  Hz, 1H), 6.89

(d,  $J = 7.1$  Hz, 1H), 5.00 (dd,  $J = 6.8$  Hz, 5.7 Hz, 1H), 4.68 (d,  $J = 14.3$  Hz, 1H), 4.02 (d,  $J = 12.3$  Hz, 1H), 3.85 (d,  $J = 14.3$  Hz, 1H), 3.81 (s, 3H), 3.37-3.30 (m, 2H), 3.12-3.06 (m, 1H), 2.78 (dd,  $J = 12.3$  Hz, 2.7 Hz, 1H), 2.72 (s, 3H), 2.46 (s, 3H), 2.40 (s, 3H);  $^{13}\text{C}$  NMR (150 MHz,  $\text{CDCl}_3$ )  $\delta$  144.2, 143.5, 137.2, 136.1, 134.0, 131.2, 130.2, 129.9, 127.5, 127.1, 126.5, 125.0, 121.3, 120.2, 116.4, 108.2, 45.8, 44.7, 43.2, 34.1, 32.8, 21.7, 21.6, 20.2; IR  $\nu_{\text{max}}$  (KBr): 3392, 3291, 2924, 2363, 1597, 1460, 1408, 1332, 1158, 1093, 819, 681, 552  $\text{cm}^{-1}$ ; HRMS  $m/z$  calcd for  $\text{C}_{28}\text{H}_{31}\text{N}_3\text{NaO}_4\text{S}_2$   $[\text{M}+\text{Na}]^+$ : 560.1654; found: 560.1652.

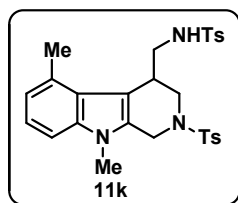

***N*-((5,9-dimethyl-2-tosyl-2,3,4,9-tetrahydro-1*H*-pyrido[3,4-*b*]indol-4-yl)methyl)-4-methylbenzenesulfonamide (11k):** Yield: 64%;  $^1\text{H}$  NMR (600 MHz,  $\text{CDCl}_3$ )  $\delta$  7.78 (d,  $J = 8.3$  Hz, 2H), 7.76 (d,  $J = 8.3$  Hz, 2H), 7.39 (d,  $J = 8.1$  Hz, 2H), 7.27 (d,  $J = 8.1$  Hz, 2H), 7.09-7.06 (m, 2H),

6.88-6.85 (m, 1H), 5.29 (dd,  $J = 7.1$  Hz, 6.4 Hz, 1H), 4.84 (d,  $J = 14.4$  Hz, 1H), 4.21 (d,  $J = 12.1$  Hz, 1H), 3.85 (d,  $J = 14.4$  Hz, 1H), 3.56-3.52 (m, 4H), 3.41 (ddd,  $J = 14.2$  Hz, 7.9 Hz, 3.9 Hz, 1H), 3.03 (ddd,  $J = 14.4$  Hz, 11.0 Hz, 5.8 Hz, 1H), 2.73-2.67 (m, 4H), 2.46 (s, 3H), 2.40 (s, 3H);  $^{13}\text{C}$  NMR (150 MHz,  $\text{CDCl}_3$ )  $\delta$  144.2, 143.4, 137.4, 137.3, 134.1, 130.3, 130.2, 130.1, 129.8, 127.4, 127.1, 124.6, 121.9, 121.4, 108.7, 106.8, 45.8, 45.5, 43.1, 35.2, 29.6, 21.7, 21.6, 19.8; IR  $\nu_{\text{max}}$  (KBr): 3280, 2924, 2259, 1597, 1458, 1333, 1160, 1090, 814, 669, 548  $\text{cm}^{-1}$ ; HRMS  $m/z$  calcd for  $\text{C}_{28}\text{H}_{31}\text{N}_3\text{NaO}_4\text{S}_2$   $[\text{M}+\text{Na}]^+$ : 560.1654; found: 560.1658.

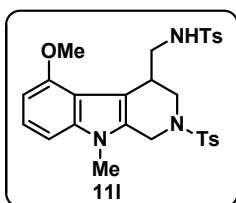

***N*-((5-methoxy-9-methyl-2-tosyl-2,3,4,9-tetrahydro-1*H*-pyrido[3,4-**

***b*]indol-4-yl)methyl)-4-methylbenzenesulfonamide (11l):** Yield: 65%;

<sup>1</sup>H NMR (600 MHz, CDCl<sub>3</sub>) δ 7.76 (d, *J* = 7.8 Hz, 2H), 7.62 (d, *J* = 7.8 Hz, 2H), 7.37 (d, *J* = 7.9 Hz, 2H), 7.17 (d, *J* = 7.9 Hz, 2H), 7.10 (t, *J* =

8.0 Hz, 1H), 6.84 (d, *J* = 8.2 Hz, 1H), 6.51 (d, *J* = 7.8 Hz, 1H), 5.40 (t, *J* = 6.1 Hz, 1H), 4.68 (d, *J* = 14.3 Hz, 1H), 4.02 (d, *J* = 12.4 Hz, 1H), 3.98 (s, 3H), 3.80 (d, *J* = 14.3 Hz, 1H), 3.58-3.52 (m, 1H), 3.50 (s, 3H), 3.48-3.44 (m, 1H), 3.06 (ddd, *J* = 13.0 Hz, 8.9 Hz, 5.1 Hz, 1H), 2.69 (dd, *J* = 12.4 Hz, 2.6 Hz, 1H), 2.45 (s, 3H), 2.37 (s, 3H); <sup>13</sup>C NMR (150 MHz, CDCl<sub>3</sub>) δ 153.5, 144.1, 142.8, 138.6, 137.5, 134.0, 130.1, 129.5, 129.0, 127.5, 127.0, 122.7, 116.0, 108.0, 102.5, 99.9, 55.2, 46.1, 45.9, 43.0, 34.5, 29.8, 21.7, 21.6; IR  $\nu_{\max}$  (KBr): 3431, 3294, 2931, 1597, 1500, 1336, 1325, 1154, 1089, 817, 670 cm<sup>-1</sup>; HRMS *m/z* calcd for C<sub>28</sub>H<sub>31</sub>N<sub>3</sub>NaO<sub>5</sub>S<sub>2</sub> [M+Na]<sup>+</sup>: 576.1603; found: 576.1602.

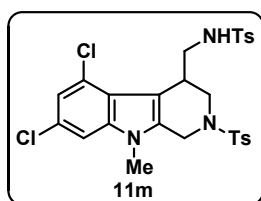

***N*-((5,7-dichloro-9-methyl-2-tosyl-2,3,4,9-tetrahydro-1*H*-pyrido[3,4-**

***b*]indol-4-yl)methyl)-4-methylbenzenesulfonamide (11m):** Yield:

53%; <sup>1</sup>H NMR (600 MHz, CDCl<sub>3</sub>) δ 7.79-7.75 (m, 4H), 7.39 (d, *J* = 7.9 Hz, 2H), 7.27-7.26 (m, 2H), 7.11 (s, 1H), 7.06 (s, 1H), 5.14 (t, *J* = 6.6

Hz, 1H), 4.79 (d, *J* = 14.6 Hz, 1H), 4.20 (d, *J* = 12.5 Hz, 1H), 3.81 (d, *J* = 14.6 Hz, 1H), 3.64 (d, *J* = 10.0 Hz, 1H), 3.60-3.54 (m, 1H), 3.52 (s, 3H), 3.02-2.96 (m, 1H), 2.67 (d, *J* = 12.2 Hz, 1H), 2.46 (s, 3H), 2.39 (s, 3H); <sup>13</sup>C NMR (150 MHz, CDCl<sub>3</sub>) δ 144.4, 143.4, 138.3, 137.3, 134.0, 132.5, 130.2, 129.8, 127.7, 127.5, 127.3, 126.1, 122.1, 120.9, 108.8, 108.0, 45.5, 43.0, 34.2, 30.0, 21.7, 21.7; IR  $\nu_{\max}$  (KBr): 3256, 2921, 2363, 1333, 1162, 947, 811, 668, 551 cm<sup>-1</sup>; HRMS *m/z* calcd for C<sub>27</sub>H<sub>27</sub>Cl<sub>2</sub>N<sub>3</sub>NaO<sub>4</sub>S<sub>2</sub> [M+Na]<sup>+</sup>: 614.0718; found: 614.0718.

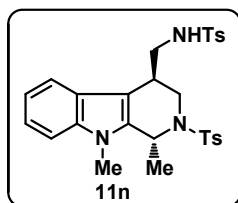

***N*-((1,9-dimethyl-2-tosyl-2,3,4,9-tetrahydro-1*H*-pyrido[3,4-*b*]indol-4-**

***yl*)methyl)-4-methylbenzenesulfonamide (11n):** Yield: 70%; <sup>1</sup>H NMR

(600 MHz, CDCl<sub>3</sub>) δ 7.80 (d, *J* = 8.2 Hz, 2H), 7.76 (d, *J* = 8.3 Hz, 2H), 7.61 (d, *J* = 7.8 Hz, 1H), 7.35 (d, *J* = 8.1 Hz, 2H), 7.27-7.25 (m, 3H), 7.22

(dd, *J* = 7.9 Hz, 7.1 Hz, 1H), 7.16 (t, *J* = 7.4 Hz, 1H), 5.25 (q, *J* = 6.6 Hz, 1H), 5.20 (dd, *J* = 7.2

Hz, 5.5 Hz, 1H), 4.14 (d,  $J = 13.6$  Hz, 1H), 3.60 (s, 3H), 3.37-3.30 (m, 2H), 3.27 (dd,  $J = 13.6$  Hz, 2.4 Hz, 1H), 2.89-2.83 (m, 1H), 2.46 (s, 3H), 2.38 (s, 3H), 1.22 (d,  $J = 6.6$  Hz, 3H);  $^{13}\text{C}$  NMR (150 MHz,  $\text{CDCl}_3$ )  $\delta$  143.8, 143.4, 138.4, 137.5, 137.3, 136.0, 130.1, 129.8, 127.0, 126.9, 125.7, 122.1, 120.0, 118.5, 109.3, 107.8, 48.1, 44.5, 40.2, 34.4, 30.1, 21.7, 21.6, 18.3; IR  $\nu_{\text{max}}$  (film): 3297, 3056, 2980, 2926, 1733, 1597, 1471, 1330, 1159, 1090, 814, 745  $\text{cm}^{-1}$ ; HRMS  $m/z$  calcd for  $\text{C}_{28}\text{H}_{31}\text{N}_3\text{NaO}_4\text{S}_2$   $[\text{M}+\text{Na}]^+$ : 560.1654; found: 560.1656.

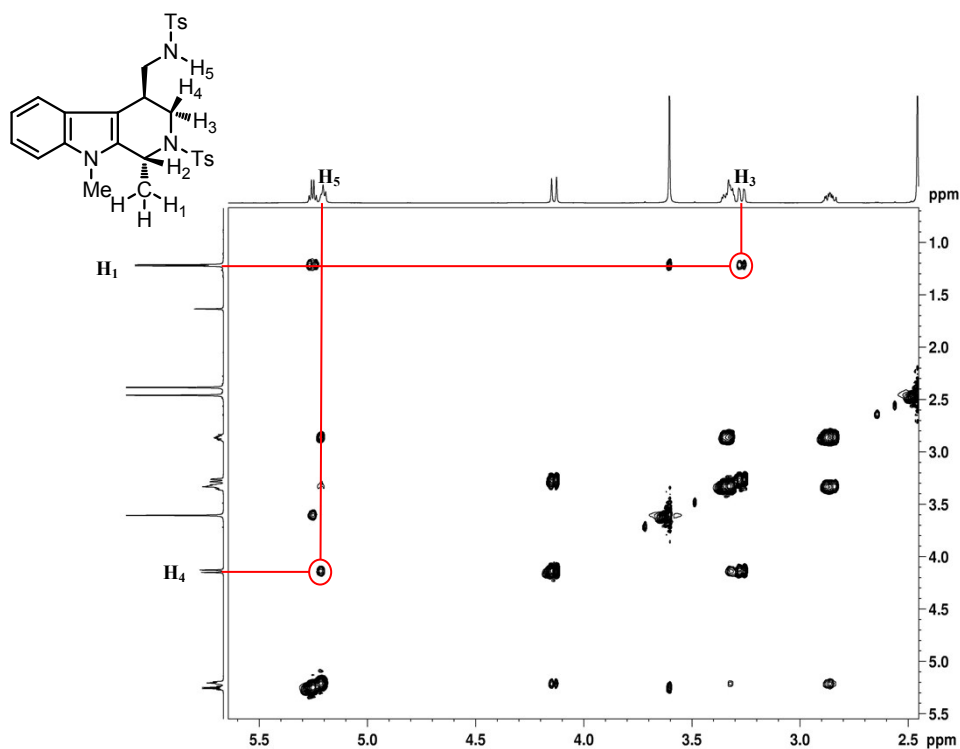

Figure S5-1 The NOESY spectrum for **11n** ( $\text{CDCl}_3$ , 600 MHz)

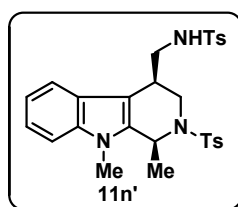

*N*-((-1,9-dimethyl-2-tosyl-2,3,4,9-tetrahydro-1H-pyrido[3,4-*b*]indol-4-yl)methyl)-4-methylbenzenesulfonamide (**11n'**): Yield: 12%;  $^1\text{H}$  NMR (600 MHz,  $\text{CDCl}_3$ )  $\delta$  7.60-7.57 (m, 4H), 7.29 (d,  $J = 8.0$  Hz, 2H), 7.27 (d,  $J = 8.2$  Hz, 1H), 7.18 (ddd,  $J = 8.2$  Hz, 7.0 Hz, 1.1 Hz, 1H), 7.10 (d,  $J = 8.0$  Hz, 2H), 6.95 (d,  $J = 7.8$  Hz, 1H), 6.90 (ddd,  $J = 7.8$  Hz, 7.0 Hz, 0.8 Hz, 1H), 5.23 (q,  $J = 6.8$  Hz, 1H), 4.13 (dd,  $J = 9.2$  Hz, 3.5 Hz, 1H), 3.98 (dd,  $J = 14.2$  Hz, 6.4 Hz, 1H), 3.65 (s, 3H), 3.40 (dd,  $J = 14.2$  Hz, 10.7 Hz, 1H), 3.36-3.28 (m, 2H), 3.21-3.16 (m, 1H), 2.45 (s, 3H), 2.26 (s, 3H), 1.50 (d,  $J = 6.8$  Hz, 3H);  $^{13}\text{C}$  NMR (150 MHz,  $\text{CDCl}_3$ )  $\delta$  143.8, 143.6, 138.4, 137.5, 137.2, 136.0,

129.9, 129.6, 127.3, 126.9, 125.0, 122.0, 119.9, 118.3, 109.5, 104.5, 47.5, 43.6, 41.5, 32.4, 29.8, 21.7, 21.5, 20.4; IR  $\nu_{\max}$  (film): 3272, 2920, 1470, 1326, 1157, 1088, 1018, 812, 664  $\text{cm}^{-1}$ ; HRMS  $m/z$  calcd for  $\text{C}_{28}\text{H}_{31}\text{N}_3\text{NaO}_4\text{S}_2$   $[\text{M}+\text{Na}]^+$ : 560.1654; found: 560.1654.

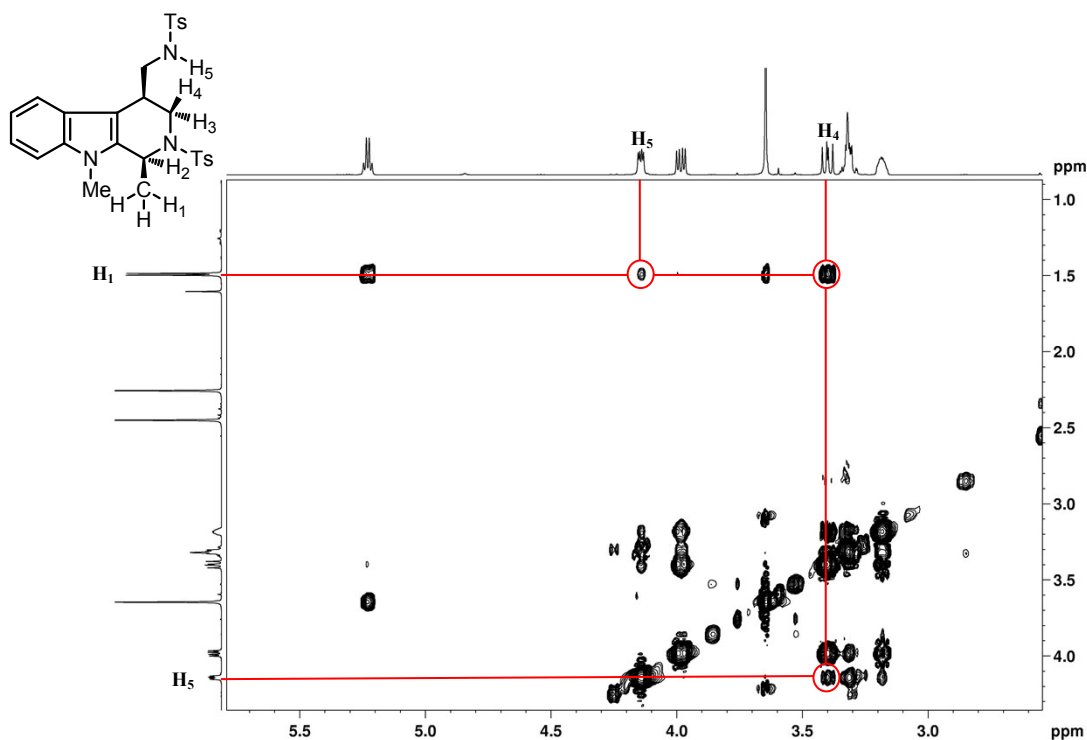

**Figure S5-2** The NOESY spectrum for **11n'** ( $\text{CDCl}_3$ , 600 MHz)

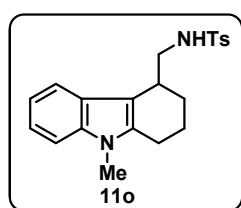

**4-methyl-N-((9-methyl-2,3,4,9-tetrahydro-1H-carbazol-4-**

**yl)methyl)benzenesulfonamide (11o):** Yield: 53%;  $^1\text{H}$  NMR (600 MHz,  $\text{CDCl}_3$ )  $\delta$  7.64 (d,  $J = 7.9$  Hz, 2H), 7.27 (d,  $J = 7.9$  Hz, 2H), 7.25-7.24 (m, 1H), 7.20 (d,  $J = 7.9$  Hz, 1H), 7.14 (t,  $J = 7.6$  Hz, 1H), 6.95 (t,  $J = 7.5$  Hz,

1H), 4.29 (t,  $J = 5.4$  Hz, 1H), 3.61 (s, 3H), 3.36-3.31 (m, 1H), 3.28-3.23 (m, 1H), 3.23-3.19 (m, 1H), 2.72-2.63 (m, 2H), 2.43 (s, 3H), 2.02-1.96 (m, 1H), 1.95-1.80 (m, 3H);  $^{13}\text{C}$  NMR (150 MHz,  $\text{CDCl}_3$ )  $\delta$  143.4, 137.9, 137.0, 136.7, 129.8, 127.3, 126.1, 120.9, 119.3, 117.9, 109.0, 107.8, 46.6, 32.9, 29.2, 26.7, 22.1, 21.7, 20.3; IR  $\nu_{\max}$  (KBr): 3295, 2933, 2859, 1923, 1598, 1470, 1321, 1159, 1093, 1053, 814, 737, 554  $\text{cm}^{-1}$ ; HRMS  $m/z$  calcd for  $\text{C}_{21}\text{H}_{24}\text{N}_2\text{NaO}_2\text{S}$   $[\text{M}+\text{Na}]^+$ : 391.1456; found: 391.1457.

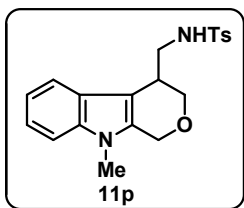

**4-methyl-*N*-((9-methyl-1,3,4,9-tetrahydropyrano[3,4-*b*]indol-4-yl)methyl)benzenesulfonamide (11p):** Yield: 54%;  $^1\text{H}$  NMR (600 MHz,  $\text{CDCl}_3$ )  $\delta$  7.61 (d,  $J = 8.1$  Hz, 2H), 7.41 (d,  $J = 7.8$  Hz, 1H), 7.27 (d,  $J = 7.6$  Hz, 1H), 7.20 (t,  $J = 7.6$  Hz, 1H), 7.16 (d,  $J = 8.0$  Hz, 2H), 7.07 (t,  $J = 7.5$  Hz, 1H), 4.93 (t,  $J = 5.8$  Hz, 1H), 4.84 (d,  $J = 14.6$  Hz, 1H), 4.74 (d,  $J = 14.6$  Hz, 1H), 4.10 (dd,  $J = 11.6$  Hz, 2.0 Hz, 1H), 3.79 (dd,  $J = 11.6$  Hz, 3.7 Hz, 1H), 3.56 (s, 3H), 3.36-3.30 (m, 2H), 3.17-3.13 (m, 1H), 2.37 (s, 3H);  $^{13}\text{C}$  NMR (150 MHz,  $\text{CDCl}_3$ )  $\delta$  143.2, 137.1, 136.8, 134.1, 129.6, 127.1, 126.0, 121.6, 119.7, 118.2, 109.1, 106.1, 68.1, 63.2, 45.7, 33.3, 29.6, 21.6; IR  $\nu_{\text{max}}$  (KBr): 3246, 2933, 2367, 1598, 1470, 1325, 1150, 1094, 1072, 740, 551  $\text{cm}^{-1}$ ; HRMS  $m/z$  calcd for  $\text{C}_{20}\text{H}_{22}\text{N}_2\text{NaO}_3\text{S}$   $[\text{M}+\text{Na}]^+$ : 393.1249; found: 393.1253.

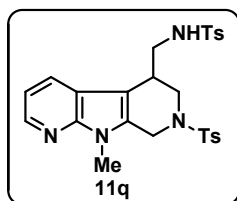

**4-methyl-*N*-((9-methyl-7-tosyl-6,7,8,9-tetrahydro-5*H*-pyrrolo[2,3-*b*:5,4-*c'*]dipyridin-5-yl)methyl)benzenesulfonamide (11q):** Yield: 62%;  $^1\text{H}$  NMR (600 MHz,  $\text{CDCl}_3$ )  $\delta$  8.27 (d,  $J = 4.2$  Hz, 1H), 7.88 (d,  $J = 3.8$  Hz, 1H), 7.76 (d,  $J = 7.7$  Hz, 2H), 7.73 (d,  $J = 7.9$  Hz, 2H), 7.38 (d,  $J = 7.8$  Hz, 2H), 7.28 (d,  $J = 7.9$  Hz, 2H), 7.07 (dd,  $J = 4.2$  Hz, 3.8 Hz, 1H), 5.02 (t,  $J = 5.5$  Hz, 1H), 4.72 (d,  $J = 14.8$  Hz, 1H), 4.01 (d,  $J = 12.4$  Hz, 1H), 3.91 (d,  $J = 14.8$  Hz, 1H), 3.71 (s, 3H), 3.41-3.36 (m, 1H), 3.33-3.27 (m, 1H), 3.19-3.13 (m, 1H), 2.85 (d,  $J = 12.4$  Hz, 1H), 2.45 (s, 3H), 2.41 (s, 3H);  $^{13}\text{C}$  NMR (150 MHz,  $\text{CDCl}_3$ )  $\delta$  148.3, 144.4, 143.6, 142.8, 137.1, 133.6, 131.6, 130.2, 129.9, 127.5, 127.1, 126.5, 118.4, 116.0, 106.4, 46.0, 45.2, 42.9, 34.0, 28.1, 21.7, 21.6; IR  $\nu_{\text{max}}$  (KBr): 3408, 3280, 2923, 1597, 1325, 1162, 1087  $\text{cm}^{-1}$ ; HRMS  $m/z$  calcd for  $\text{C}_{26}\text{H}_{29}\text{N}_4\text{O}_4\text{S}_2$   $[\text{M}+\text{H}]^+$ : 525.1630; found: 525.1631.

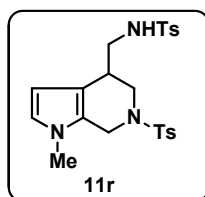

**4-methyl-*N*-((1-methyl-6-tosyl-4,5,6,7-tetrahydro-1*H*-pyrrolo[2,3-*c*]pyridin-4-yl)methyl)benzenesulfonamide (11r):** Yield: 75%;  $^1\text{H}$  NMR (400 MHz,  $\text{CDCl}_3$ )  $\delta$  7.73 (d,  $J = 8.3$  Hz, 2H), 7.71 (d,  $J = 8.5$  Hz, 2H), 7.34 (d,  $J = 7.9$  Hz, 2H), 7.30 (d,  $J = 7.9$  Hz, 2H), 6.45 (s, 1H), 5.85 (s, 1H), 4.86 (t,  $J = 6.0$  Hz, 1H), 4.29 (d,  $J = 13.5$  Hz, 1H), 3.87 (d,  $J = 13.5$  Hz, 1H), 3.53 (d,  $J = 10.2$  Hz, 1H), 3.42 (s, 3H), 3.18-3.09 (m, 1H), 3.05-2.94 (m, 3H), 2.43 (s, 3H), 2.42 (s, 3H);  $^{13}\text{C}$  NMR (100

MHz, CDCl<sub>3</sub>) δ 144.0, 143.5, 137.0, 133.8, 130.0, 129.8, 127.5, 127.1, 123.4, 121.8, 115.9, 105.4, 46.2, 45.6, 42.9, 34.5, 33.3, 21.6, 21.6; IR  $\nu_{\max}$  (KBr): 3315, 2921, 1596, 1340, 1162, 1089, 818, 661, 549 cm<sup>-1</sup>; HRMS m/z calcd for C<sub>23</sub>H<sub>27</sub>N<sub>3</sub>NaO<sub>4</sub>S<sub>2</sub> [M+Na]<sup>+</sup>: 496.1341; found: 496.1344.

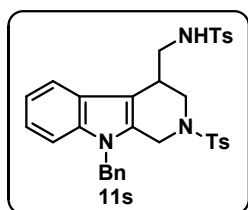

**N-((9-benzyl-2-tosyl-2,3,4,9-tetrahydro-1H-pyrido[3,4-b]indol-4-yl)methyl)-4-methylbenzenesulfonamide (11s):** Yield: 86%; <sup>1</sup>H NMR (600 MHz, CDCl<sub>3</sub>) δ 7.77 (d, *J* = 8.2 Hz, 2H), 7.67 (d, *J* = 8.2 Hz, 2H), 7.59 (d, *J* = 7.3 Hz, 1H), 7.32 (d, *J* = 8.1 Hz, 2H), 7.29 (d, *J* = 8.2 Hz, 2H), 7.27-7.24 (m, 3H), 7.22 (d, *J* = 7.9 Hz, 1H), 7.17 (ddd, *J* = 7.8 Hz, 7.0 Hz, 1.0 Hz, 1H), 7.13 (ddd, *J* = 7.8 Hz, 7.0 Hz, 0.8 Hz, 1H), 6.98-6.95 (m, 2H), 5.23 (d, *J* = 16.9 Hz, 1H), 5.12 (d, *J* = 16.9 Hz, 1H), 5.06 (dd, *J* = 6.8 Hz, 5.8 Hz, 1H), 4.62 (d, *J* = 14.6 Hz, 1H), 4.01 (dd, *J* = 12.4 Hz, 1.3 Hz, 1H), 3.75 (d, *J* = 14.6 Hz, 1H), 3.43-3.37 (m, 2H), 3.17-3.11 (m, 1H), 2.82 (dd, *J* = 12.4 Hz, 3.0 Hz, 1H), 2.43 (s, 3H), 2.41 (s, 3H); <sup>13</sup>C NMR (150 MHz, CDCl<sub>3</sub>) δ 144.1, 143.5, 137.3, 137.2, 136.8, 134.0, 130.9, 130.1, 129.9, 129.1, 127.9, 127.5, 127.2, 126.3, 125.9, 122.3, 120.3, 118.6, 109.8, 108.8, 47.1, 45.8, 44.9, 43.1, 34.3, 21.7, 21.6; IR  $\nu_{\max}$  (KBr): 3302, 3059, 2292, 1597, 1453, 1332, 1162, 1090, 814, 743 cm<sup>-1</sup>; HRMS m/z calcd for C<sub>33</sub>H<sub>33</sub>N<sub>3</sub>NaO<sub>4</sub>S<sub>2</sub> [M+Na]<sup>+</sup>: 622.1810; found: 622.1812.

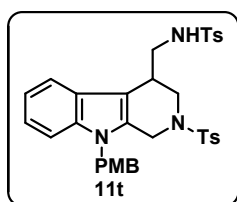

**N-((9-(4-methoxybenzyl)-2-tosyl-2,3,4,9-tetrahydro-1H-pyrido[3,4-b]indol-4-yl)methyl)-4-methylbenzenesulfonamide (11t):** Yield: 74%; <sup>1</sup>H NMR (600 MHz, CDCl<sub>3</sub>) δ 7.77 (d, *J* = 8.3 Hz, 2H), 7.67 (d, *J* = 8.2 Hz, 2H), 7.57 (d, *J* = 7.6 Hz, 1H), 7.32 (d, *J* = 8.1 Hz, 2H), 7.29 (d, *J* = 8.1 Hz, 2H), 7.24 (d, *J* = 8.1 Hz, 1H), 7.17 (ddd, *J* = 7.8 Hz, 7.1 Hz, 0.9 Hz, 1H), 7.13 (ddd, *J* = 7.9 Hz, 7.0 Hz, 0.9 Hz, 1H), 6.91 (d, *J* = 8.7 Hz, 2H), 6.79 (d, *J* = 8.7 Hz, 2H), 5.18 (d, *J* = 16.5 Hz, 1H), 5.07 (dd, *J* = 7.5 Hz, 6.8 Hz, 1H), 5.04 (d, *J* = 16.5 Hz, 1H), 4.60 (d, *J* = 14.6 Hz, 1H), 4.00 (dd, *J* = 12.4 Hz, 1.5 Hz, 1H), 3.76 (s, 3H), 3.72 (d, *J* = 14.6 Hz, 1H), 3.43-3.35 (m, 2H), 3.17-3.10 (m, 1H), 2.80 (dd, *J* = 12.4 Hz, 3.1 Hz, 1H), 2.43 (s, 3H), 2.41 (s, 3H); <sup>13</sup>C NMR (150 MHz, CDCl<sub>3</sub>) δ 159.3, 144.1, 143.5, 137.3, 137.1, 133.9, 130.9, 130.1, 129.9, 128.8, 127.7, 127.5, 127.2, 125.9, 122.2, 120.2, 118.5, 114.5, 109.8, 108.7, 55.4, 46.6, 45.8, 44.9, 43.2, 34.3, 21.7, 21.6; IR  $\nu_{\max}$  (KBr): 3392, 3293, 2923, 2359, 2332, 1612, 1597, 1513, 1458, 1336, 1162, 1090, 814, 663,

548 cm<sup>-1</sup>; HRMS m/z calcd for C<sub>34</sub>H<sub>35</sub>N<sub>3</sub>NaO<sub>5</sub>S<sub>2</sub> [M+Na]<sup>+</sup>: 652.1916; found: 652.1917.

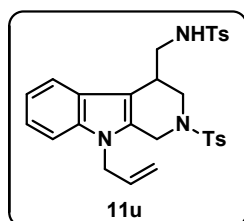

***N*-((9-allyl-2-tosyl-2,3,4,9-tetrahydro-1*H*-pyrido[3,4-*b*]indol-4-**

**yl)methyl)-4-methylbenzenesulfonamide (11u):** Yield: 82%; <sup>1</sup>H NMR

(600 MHz, CDCl<sub>3</sub>) δ 7.76 (d, *J* = 7.9 Hz, 2H), 7.75 (d, *J* = 7.9 Hz, 2H),

7.56 (d, *J* = 7.8 Hz, 1H), 7.37 (d, *J* = 8.1 Hz, 2H), 7.28 (d, *J* = 8.1 Hz, 2H),

7.24 (d, *J* = 8.2 Hz, 1H), 7.19 (dd, *J* = 8.2 Hz, 7.0 Hz, 1H), 7.12 (dd, *J* = 7.8 Hz, 7.0 Hz, 1H),

5.90-5.82 (m, 1H), 5.12 (d, *J* = 10.3 Hz, 1H), 5.07 (dd, *J* = 6.6 Hz, 6.2 Hz, 1H), 4.85 (d, *J* = 17.0

Hz, 1H), 4.66 (d, *J* = 14.4 Hz, 1H), 4.61-4.52 (m, 2H), 4.02 (dd, *J* = 12.5 Hz, 1.8 Hz, 1H), 3.88 (d,

*J* = 14.4 Hz, 1H), 3.42-3.34 (m, 2H), 3.12 (ddd, *J* = 13.6 Hz, 9.1 Hz, 5.6 Hz, 1H), 2.84 (dd, *J* =

12.4 Hz, 3.1 Hz, 1H), 2.45 (s, 3H), 2.40 (s, 3H); <sup>13</sup>C NMR (150 MHz, CDCl<sub>3</sub>) δ 144.2, 143.5,

137.3, 136.8, 134.1, 132.7, 130.7, 130.1, 129.9, 127.5, 127.1, 125.8, 122.1, 120.1, 118.5, 117.1,

109.6, 108.5, 45.9, 45.7, 44.9, 42.9, 34.2, 21.7, 21.6; IR ν<sub>max</sub> (KBr): 3293, 2920, 1597, 1457, 1335,

1161, 1089, 662 cm<sup>-1</sup>; HRMS m/z calcd for C<sub>29</sub>H<sub>31</sub>N<sub>3</sub>NaO<sub>4</sub>S<sub>2</sub> [M+Na]<sup>+</sup>: 572.1654; found:

572.1656.

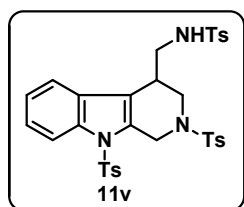

***N*-((2,9-ditosyl-2,3,4,9-tetrahydro-1*H*-pyrido[3,4-*b*]indol-4-yl)methyl)-**

**4-methylbenzenesulfonamide (11v):** Yield: 63%; <sup>1</sup>H NMR (600 MHz,

CDCl<sub>3</sub>) δ 8.04 (d, *J* = 8.2 Hz, 1H), 7.78 (d, *J* = 8.3 Hz, 2H), 7.74 (d, *J* =

8.3 Hz, 2H), 7.66 (d, *J* = 8.3 Hz, 2H), 7.53 (d, *J* = 7.3 Hz, 1H), 7.39 (d, *J*

= 8.1 Hz, 2H), 7.31 (td, *J* = 7.3 Hz, 1.0 Hz, 1H), 7.29-7.28 (m, 1H), 7.27-7.26 (m, 2H), 7.21 (d, *J*

= 8.1 Hz, 2H), 5.23 (t, *J* = 6.5 Hz, 1H), 5.15 (d, *J* = 16.5 Hz, 1H), 4.12 (d, *J* = 12.7 Hz, 1H), 4.08

(dd, *J* = 16.5 Hz, 1.0 Hz, 1H), 3.32-3.26 (m, 2H), 3.05 (ddd, *J* = 15.2 Hz, 11.0 Hz, 6.1 Hz, 1H),

2.73 (dd, *J* = 12.7 Hz, 2.6 Hz, 1H), 2.47 (s, 3H), 2.39 (s, 3H), 2.33 (s, 3H); <sup>13</sup>C NMR (150 MHz,

CDCl<sub>3</sub>) δ 145.5, 144.3, 143.6, 137.4, 136.1, 135.3, 134.5, 130.7, 130.3, 130.2, 129.9, 128.4, 127.4,

127.1, 126.6, 125.1, 124.1, 118.9, 117.6, 114.4, 45.1, 44.7, 44.0, 34.5, 21.7, 21.6; IR ν<sub>max</sub> (film):

3292, 3063, 2923, 2856, 2359, 1596, 1452, 1336, 1161, 1089, 813, 737 cm<sup>-1</sup>; HRMS m/z calcd for

C<sub>33</sub>H<sub>34</sub>N<sub>3</sub>O<sub>6</sub>S<sub>3</sub> [M+H]<sup>+</sup>: 664.1610; found: 664.1614.



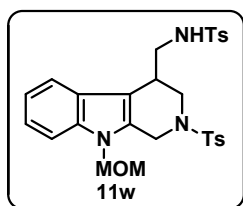

*N*-((9-(methoxymethyl)-2-tosyl-2,3,4,9-tetrahydro-1*H*-pyrido[3,4-

*b*]indol-4-yl)methyl)-4-methylbenzenesulfonamide (**11w**): Yield: 77%;

<sup>1</sup>H NMR (600 MHz, CDCl<sub>3</sub>) δ 7.78-7.75 (m, 4H), 7.57 (d, *J* = 7.8 Hz, 1H), 7.41-7.35 (m, 3H), 7.28 (d, *J* = 7.8 Hz, 2H), 7.23 (t, *J* = 7.8 Hz, 1H),

7.16 (t, *J* = 7.4 Hz, 1H), 5.30 (s, 2H), 5.11 (t, *J* = 6.5 Hz, 1H), 4.78 (d, *J* = 14.7 Hz, 1H), 4.07 (d, *J* = 12.4 Hz, 1H), 3.94 (d, *J* = 14.7 Hz, 1H), 3.41-3.34 (m, 2H), 3.20 (s, 3H), 3.16-3.10 (m, 1H), 2.84 (d, *J* = 12.4 Hz, 1H), 2.45 (s, 3H), 2.40 (s, 3H); <sup>13</sup>C NMR (150 MHz, CDCl<sub>3</sub>) δ 144.2, 143.5, 137.5, 137.2, 134.0, 130.9, 130.1, 129.9, 127.5, 127.1, 126.1, 122.6, 120.8, 118.6, 110.2, 109.5, 74.2, 56.1, 45.7, 44.7, 42.9, 34.2, 21.7, 21.6; IR  $\nu_{\max}$  (KBr): 3297, 2921, 1597, 1458, 1334, 1161, 1087, 815 cm<sup>-1</sup>; HRMS *m/z* calcd for C<sub>28</sub>H<sub>31</sub>N<sub>3</sub>NaO<sub>5</sub>S<sub>2</sub> [M+Na]<sup>+</sup>: 576.1603; found: 576.1605.

## 6. The Procedure for the One-pot Three-steps Reaction

A dried flask was charged with copper(I) thiophene-2-carboxylate (CuTC, 3.8 mg, 0.02 mmol, 0.1 equiv.), toluene (2.0 mL), and the alkyne (0.20 mmol, 1.0 equiv.). The reaction mixture was cooled in an ice-water bath. Subsequently, the sulfonyl azide (0.22 mmol, 1.1 equiv.) was added slowly, and the reaction mixture was allowed to warm to room temperature and keep stirring until the completion of the reaction. The solvent was evaporated *in vacuo* and the residue was redissolved in freshly distilled 1,2-dichloroethane (1.0 mL) in a 10 mL pressure tube. The mixture was placed in an oil bath preheated to 140 °C for 5 min, then NaBH<sub>3</sub>CN (25.1 mg, 0.4 mmol, 2.0 equiv.) was added, and the reaction mixture was stirred at 80 °C for 3 h. After the mixture was cooled to room temperature, the solvent was removed under reduced pressure and the residue was purified by flash column chromatography (eluent: petroleum ether/EtOAc) to give the product **11a-11c**, **11e-11f** and **11s**.

## 7. Preparation of 9-(methoxymethyl)-4-methyl-9*H*-pyrido[3,4-*b*]indole

An aqueous solution of sodium hydroxide (30% w/w, 133 mg, 1.00 mmol) was added to a solution of **11w** (111 mg, 0.20 mmol) in DMSO (1.0 mL). The mixture was heated to around 125 °C, and

then stirred at this temperature for 1 h. The reaction was monitored by TLC. After the reaction was complete, the mixture was allowed to cool to room temperature and diluted with water (10 mL). The aqueous solution was then extracted with ethyl acetate (3×15 mL). The extracts were combined and dried with anhydrous Na<sub>2</sub>SO<sub>4</sub>. Evaporation of the solvent gave a crude oil which was purified by flash chromatography (eluent: Et<sub>2</sub>O/MeOH 20:1) to give the product **13**.

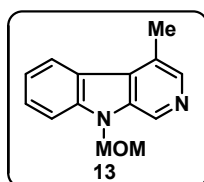

**9-(methoxymethyl)-4-methyl-9H-pyrido[3,4-b]indole (13):** Yield: 61%;

<sup>1</sup>H NMR (400 MHz, CDCl<sub>3</sub>) δ 8.88 (s, 1H), 8.30 (s, 1H), 8.21 (d, *J* = 7.9 Hz, 1H), 7.64-7.58 (m, 2H), 7.35 (ddd, *J* = 7.9 Hz, 6.3 Hz, 1.8 Hz, 1H), 5.74 (s, 2H), 3.30 (s, 3H), 2.84 (s, 3H); <sup>13</sup>C NMR (100 MHz, CDCl<sub>3</sub>) δ 141.2, 141.0,

136.5, 130.4, 128.1, 127.9, 127.3, 123.9, 122.5, 120.8, 110.0, 74.5, 56.4, 17.5; IR ν<sub>max</sub> (film): 2940, 1617, 1456, 1427, 1327, 1263, 1160, 1102, 1064, 730 cm<sup>-1</sup>; HRMS *m/z* calcd for C<sub>14</sub>H<sub>15</sub>N<sub>2</sub>O [M+H]<sup>+</sup>: 227.1184; found: 227.1186.

Note: only <sup>1</sup>H MNR data of **13** was provided in reference 14 (in our paper). However, it seemed that the documented data was incorrect. The structure of **13** obtained in our hands was unambiguously confirmed by extensive spectroscopic study as well as its transformation into **14**, a well-known compound<sup>10</sup>.

**Table S7-1.** NMR Data for **13**

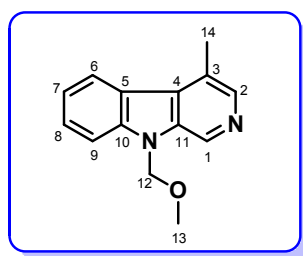

| No.             | <sup>1</sup> H <sup>a</sup>          | <sup>13</sup> C <sup>a</sup> | DEPT <sup>a</sup> | HMBC <sup>b</sup> |
|-----------------|--------------------------------------|------------------------------|-------------------|-------------------|
| 1               | 8.88 (s)                             | 130.4                        | CH                | 2                 |
| 2               | 8.30 (s)                             | 141.0                        | CH                | 1, 14             |
| 3               |                                      | 127.3                        | C                 | 2, 14             |
| 4               |                                      | 127.9                        | C                 | 1, 2, 6, 14       |
| 5               |                                      | 122.5                        | C                 | 2, 6, 7, 9        |
| 6               | 8.21 (d, <i>J</i> = 7.9)             | 123.9                        | CH                | 8                 |
| 7               | 7.35 (ddd, <i>J</i> = 7.9, 6.3, 1.8) | 120.8                        | CH                | 9                 |
| 8               | 7.60 (m)                             | 128.1                        | CH                | 6                 |
| 9               | 7.61 (m)                             | 110.0                        | CH                | 6, 7              |
| 10              |                                      | 141.2                        | C                 | 6, 12             |
| 11              |                                      | 136.9                        | C                 | 1, 12             |
| 12              | 5.74 (s)                             | 74.5                         | CH <sub>2</sub>   | 13                |
| 13 <sup>α</sup> | 3.30 (s)                             | 56.4                         | CH <sub>3</sub>   | 12                |
| 14              | 2.84 (s)                             | 17.5                         | CH <sub>3</sub>   | 2                 |

<sup>a</sup>Recorded in CDCl<sub>3</sub> at 400 MHz, <sup>b</sup>Carbons that correlate with the proton resonance.

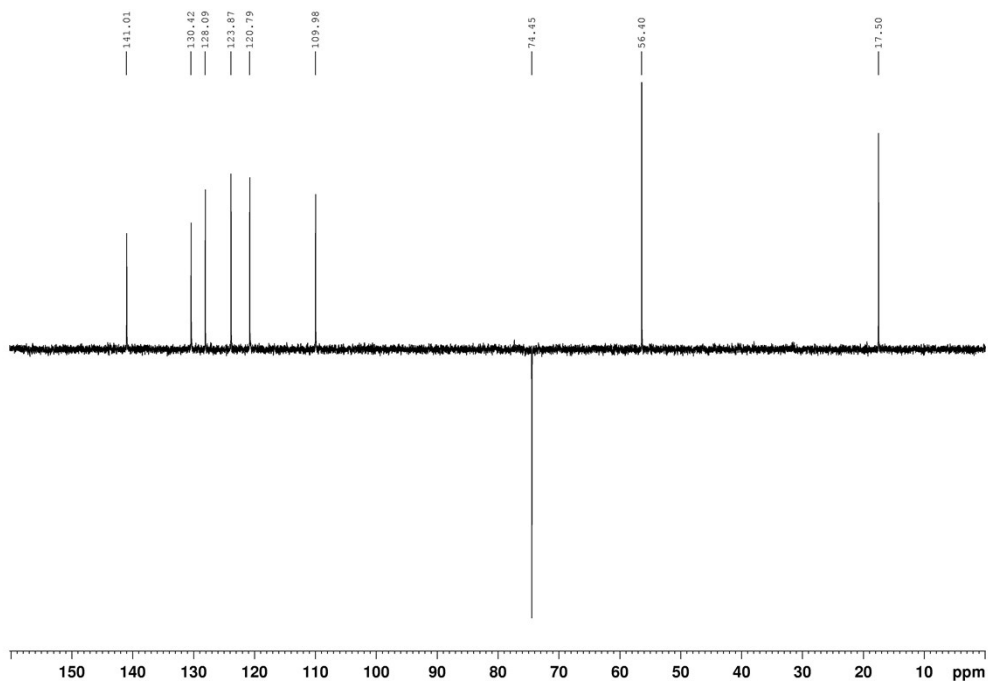

**Figure S7-1** The DEPT spectrum for **13**

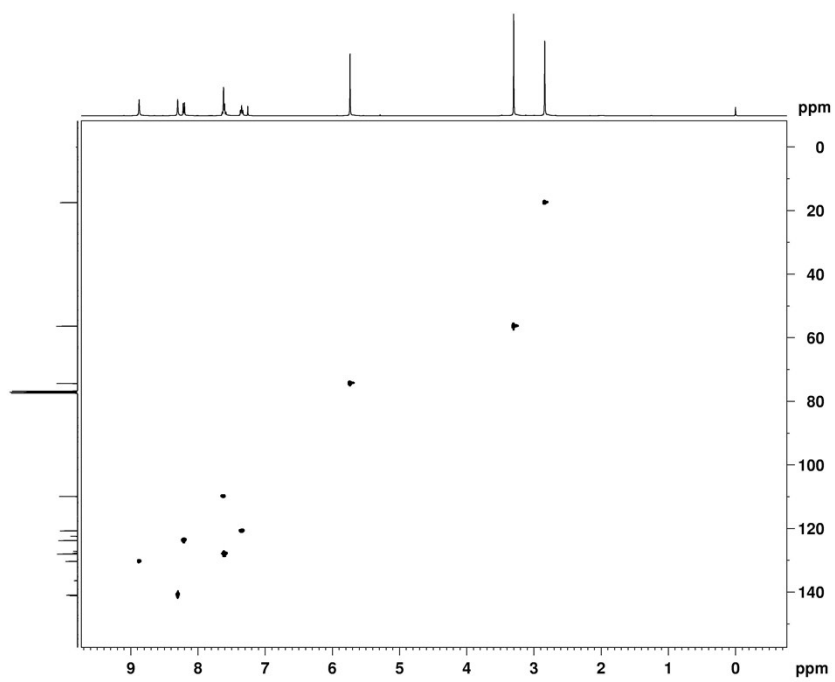

**Figure S7-2** The HSQC spectrum for **13**

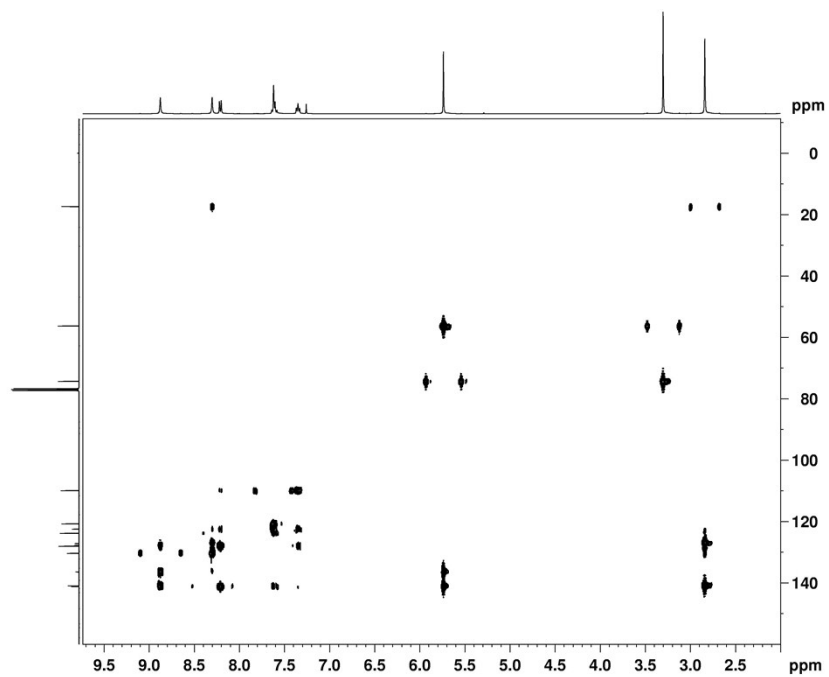

**Figure S7-3** The HMBC spectrum for **13**

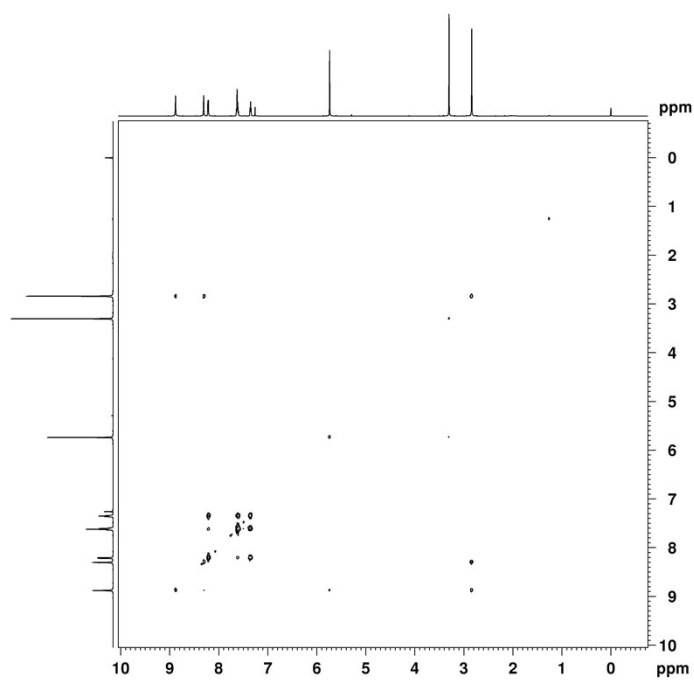

**Figure S7-4** The  $^1\text{H}$ - $^1\text{H}$  COSY spectrum for **13**

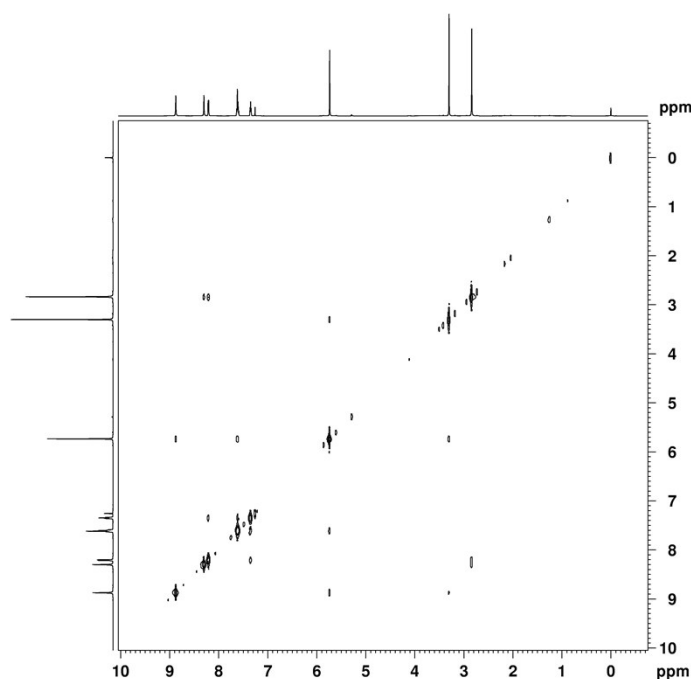

**Figure S7-5** The NOESY spectrum for **13**

#### Preparation of 4-methyl-9H-pyrido[3,4-b]indole (**14**)

Trifluoromethanesulfonic acid (35  $\mu$ L, 0.39 mmol, 3.0 equiv.) was added to an ice-cooled mixture of **13** (30.0 mg, 0.13 mmol), MeOH (53  $\mu$ L, 1.30 mmol, 10.0 equiv.), and trimethyl orthoformate (143  $\mu$ L, 1.30 mmol, 10.0 equiv.) in nitromethane (2.0 mL). The resulting mixture was heated at 100  $^{\circ}$ C for 1 h. After the reaction was complete, the mixture was allowed to cool to room temperature and diluted with water (10 mL). The resulting solution was extracted with ethyl acetate (3 $\times$ 15 mL) and the combined extracts were dried with Na<sub>2</sub>SO<sub>4</sub>. The solvent was evaporated *in vacuo* and the residue was purified by a silica gel flash column chromatography (eluent: EtOAc/MeOH) to give the *N*-deprotected  $\beta$ -carboline **14**.

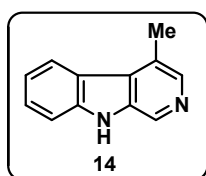

**4-methyl-9H-pyrido[3,4-b]indole (**14**):** Yield: 70%; <sup>1</sup>H NMR (600 MHz, DMSO)  $\delta$  11.62 (s, 1H), 8.75 (s, 1H), 8.20 (d,  $J$  = 8.0 Hz, 1H), 8.14 (s, 1H), 7.61 (d,  $J$  = 8.2 Hz, 1H), 7.54 (t,  $J$  = 7.7 Hz, 1H), 7.26 (t,  $J$  = 7.6 Hz, 1H), 2.78 (s, 3H); <sup>13</sup>C NMR (150 MHz, DMSO)  $\delta$  140.9, 139.1, 136.0, 132.3, 128.0, 126.8, 126.6, 123.8, 121.6, 119.8, 112.3, 17.5; IR  $\nu_{\text{max}}$  (film): 3464, 3048, 2851, 1624, 1570,

1461, 1423, 1328, 1133, 1070, 718  $\text{cm}^{-1}$ ; HRMS  $m/z$  calcd for  $\text{C}_{12}\text{H}_{11}\text{N}_2$   $[\text{M}+\text{H}]^+$ : 183.0922; found: 183.0924.

## References

- [1]. C. F. Li, H. Liu, J. Liao, Y. J. Cao, X. P. Liu, and W. J. Xiao, *Org. Lett.* 2007, **9**, 1847-1850.
- [2]. C. W. Zheng, Y. P. Lu, J. K. Zhang, X. K. Chen, Z. Chai, W. Y. Ma, and G. Zhao, *Chem. Eur. J.* 2010, **16**, 5853-5857.
- [3]. M. Bandini, A. Gualandi, M. Monari, A. Romaniello, D. Savoia, M. Tragni, *J. Organomet. Chem.* 2011, **696**, 337-347.
- [4]. J. Raushel, and V. V. Fokin, *Org. Lett.* 2010, **12**, 4952-495.
- [5]. N. Gigant, E. Claveau, P. Bouyssou, and I. Gillaizeau, *Org. Lett.* 2012, **14**, 844-847.
- [6]. M. Sechi, M. Derudas, R. Dallochio, A. Dessi, A. Bacchi, L. Sannia, F. Carta, M. Palomba, O. Ragab, C. Chan, R. Shoemaker, S. Sei, R. Dayam, and N. Neamati. *J. Med. Chem.* 2004, **47**, 5298-5310.
- [7]. A. Tsotinis, P. A. Afroudakis, K. Davidson, A. Prashar, and D. Sugde, *J. Med. Chem.* 2007, **50**, 6436-6440.
- [8]. Y. Abe, H. Takikawa, and K. Mori, *Biosci. Biotechnol. Biochem.* 2001, **65**, 732-735.
- [9]. Y. Q. Zhang, D. Y. Zhu, Z. W. Jiao, B. S. Li, F. M. Zhang, Y. Q. Tu, and Z. G. Bi, *Org. Lett.* 2011, **13**, 3458-3461.
- [10]. M. E. Rhepperle, J. F. Liu, F. Soucy, Y. Ye, R. S. Murray, R. Prakash, J. D. Little, A. Castro, H. Mazdiyasi, P. E. Fleming, and D. Reynolds. U.S. Patent 2004/0235839, 2004.

## 8. X-ray Crystallographic Studies for 11a

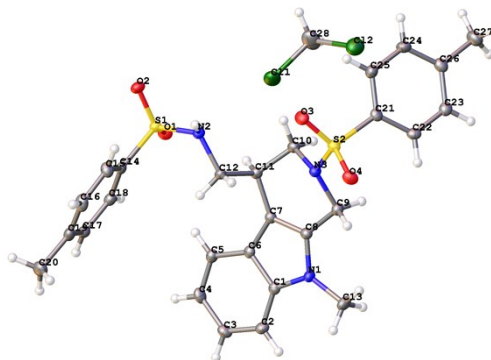

**Figure S8-1.** ORTEP drawing of **11a** with 30% thermal ellipsoids.

**Table S8-1** Crystal data and structure refinement for **11a**

|                                                                         |                                                                                              |
|-------------------------------------------------------------------------|----------------------------------------------------------------------------------------------|
| Identification code                                                     | <b>11a</b>                                                                                   |
| Empirical formula                                                       | C <sub>28</sub> H <sub>31</sub> Cl <sub>2</sub> N <sub>3</sub> O <sub>4</sub> S <sub>2</sub> |
| Formula weight                                                          | 608.58                                                                                       |
| Temperature / K                                                         | 106.6                                                                                        |
| Crystal system                                                          | triclinic                                                                                    |
| Space group                                                             | P-1                                                                                          |
| a / Å, b / Å, c / Å                                                     | 9.7402(4), 11.9977(7), 13.1123(5)                                                            |
| α/°, β/°, γ/°                                                           | 71.536(4), 83.542(4), 81.195(4)                                                              |
| Volume / Å <sup>3</sup>                                                 | 1432.95(12)                                                                                  |
| Z                                                                       | 2                                                                                            |
| ρ <sub>calc</sub> / mg mm <sup>-3</sup>                                 | 1.410                                                                                        |
| μ / mm <sup>-1</sup>                                                    | 0.412                                                                                        |
| F(000)                                                                  | 636                                                                                          |
| Crystal size / mm <sup>3</sup>                                          | 0.55 × 0.45 × 0.45                                                                           |
| 2θ range for data collection                                            | 6.34 to 52°                                                                                  |
| Index ranges                                                            | -12 ≤ h ≤ 12, -10 ≤ k ≤ 14, -16 ≤ l ≤ 16                                                     |
| Reflections collected                                                   | 9944                                                                                         |
| Independent reflections                                                 | 5606[R(int) = 0.0244 (inf-0.9Å)]                                                             |
| Data/restraints/parameters                                              | 5606/0/355                                                                                   |
| Goodness-of-fit on F <sup>2</sup>                                       | 1.036                                                                                        |
| Final R indexes [I > 2σ (I) i.e. F <sub>o</sub> > 4σ (F <sub>o</sub> )] | R <sub>1</sub> = 0.0383, wR <sub>2</sub> = 0.0843                                            |
| Final R indexes [all data]                                              | R <sub>1</sub> = 0.0485, wR <sub>2</sub> = 0.0899                                            |
| Largest diff. peak/hole / e Å <sup>-3</sup>                             | 0.395/-0.392                                                                                 |

|                  |       |
|------------------|-------|
| Flack Parameters | N     |
| Completeness     | 0.998 |

**Table S8-2** Fractional Atomic Coordinates ( $\times 10^4$ ) and Equivalent Isotropic Displacement Parameters ( $\text{\AA}^2 \times 10^3$ ) for **11a**.  $U_{\text{eq}}$  is defined as 1/3 of the trace of the orthogonalised  $U_{ij}$  tensor.

| Atom | <i>x</i>    | <i>y</i>   | <i>z</i>   | U(eq)     |
|------|-------------|------------|------------|-----------|
| S1   | 1036.3(5)   | 850.1(4)   | 2567.7(4)  | 15.13(12) |
| S2   | 1264.4(5)   | 6292.7(5)  | 522.4(4)   | 16.66(12) |
| Cl2  | 6012.1(6)   | 4579.9(6)  | 2473.9(5)  | 36.70(16) |
| Cl1  | 4557.1(6)   | 2518.1(6)  | 3559.1(6)  | 38.66(17) |
| O1   | 1486.9(13)  | 661.6(13)  | 3621.7(11) | 19.7(3)   |
| O3   | 1582.1(14)  | 5436.9(13) | -46.1(11)  | 22.3(3)   |
| O2   | 1829.9(14)  | 251.1(13)  | 1862.0(11) | 21.4(3)   |
| N1   | -1667.3(16) | 5748.7(15) | 4043.5(13) | 16.2(4)   |
| N3   | 842.1(16)   | 5589.4(15) | 1772.2(13) | 15.8(4)   |
| N2   | 959.1(16)   | 2258.4(14) | 1929.6(13) | 15.2(3)   |
| O4   | 159.6(13)   | 7252.3(13) | 191.4(11)  | 20.9(3)   |
| C14  | -692.1(19)  | 491.0(17)  | 2747.3(16) | 15.5(4)   |
| C5   | -1405(2)    | 2606.0(18) | 5257.8(16) | 17.4(4)   |
| C21  | 2805.8(19)  | 6916.9(18) | 485.7(15)  | 15.8(4)   |
| C2   | -3194(2)    | 4591.2(19) | 5560.5(16) | 18.8(4)   |
| C18  | -1361(2)    | 151.1(18)  | 3772.5(16) | 17.2(4)   |
| C9   | 147(2)      | 6280.6(18) | 2479.2(16) | 17.2(4)   |
| C11  | 820.4(19)   | 3607.5(18) | 3077.1(15) | 14.9(4)   |
| C8   | -554.2(19)  | 5423.0(18) | 3402.8(15) | 15.3(4)   |
| C7   | -229.2(19)  | 4225.0(17) | 3709.5(15) | 14.2(4)   |
| C22  | 2790(2)     | 7852.7(19) | 902.2(16)  | 18.3(4)   |
| C23  | 4030(2)     | 8264.8(19) | 934.3(16)  | 19.5(4)   |
| C25  | 4041(2)     | 6428.6(19) | 72.4(17)   | 21.4(5)   |
| C17  | -2724(2)    | -103.2(18) | 3894.2(17) | 19.4(4)   |
| C15  | -1396(2)    | 602.6(19)  | 1847.4(17) | 21.0(4)   |
| C10  | 1739.7(19)  | 4503.9(18) | 2324.5(16) | 16.7(4)   |
| C19  | -3446(2)    | 2.8(18)    | 3006.5(17) | 20.7(5)   |
| C1   | -2086.0(19) | 4731.8(18) | 4776.8(16) | 16.0(4)   |
| C3   | -3388(2)    | 3451.7(19) | 6183.4(16) | 20.5(5)   |
| C20  | -4914(2)    | -299(2)    | 3135(2)    | 29.2(5)   |
| C27  | 6651(2)     | 8179(2)    | 627.8(19)  | 29.3(5)   |
| C12  | 36.9(19)    | 3068.0(18) | 2434.5(16) | 16.2(4)   |
| C24  | 5277(2)     | 6855(2)    | 108.9(18)  | 23.8(5)   |
| C26  | 5295(2)     | 7763.2(19) | 554.3(16)  | 20.5(5)   |
| C16  | -2766(2)    | 370.7(19)  | 1982.8(17) | 23.2(5)   |
| C13  | -2262(2)    | 6952.0(18) | 3986.5(18) | 23.5(5)   |
| C4   | -2499(2)    | 2466.5(19) | 6044.7(16) | 20.3(4)   |
| C6   | -1190.6(19) | 3746.9(17) | 4603.1(15) | 14.8(4)   |



|                                                                                                                                                                                                                                  | C28      | 6169(2)  | 3086(2)  | 3251(2)   | 41.4(7)   |           |
|----------------------------------------------------------------------------------------------------------------------------------------------------------------------------------------------------------------------------------|----------|----------|----------|-----------|-----------|-----------|
| <b>Table S8-3</b> Anisotropic Displacement Parameters ( $\text{\AA}^2 \times 10^3$ ) for <b>11a</b> . The Anisotropic displacement factor exponent takes the form: $-2\pi^2[h^2a^*U_{11} + \dots + 2hka \times b \times U_{12}]$ |          |          |          |           |           |           |
| Atom                                                                                                                                                                                                                             | $U_{11}$ | $U_{22}$ | $U_{33}$ | $U_{23}$  | $U_{13}$  | $U_{12}$  |
| S1                                                                                                                                                                                                                               | 14.9(2)  | 15.2(3)  | 14.8(2)  | -4.5(2)   | -0.81(18) | -0.71(18) |
| S2                                                                                                                                                                                                                               | 15.7(2)  | 20.4(3)  | 14.1(2)  | -5.0(2)   | -0.82(18) | -4.0(2)   |
| Cl2                                                                                                                                                                                                                              | 42.5(4)  | 34.2(4)  | 30.0(3)  | -7.5(3)   | 5.6(3)    | -5.3(3)   |
| Cl1                                                                                                                                                                                                                              | 22.3(3)  | 30.2(3)  | 61.9(4)  | -15.4(3)  | 2.3(3)    | 0.4(2)    |
| O1                                                                                                                                                                                                                               | 18.4(7)  | 22.9(8)  | 16.7(7)  | -4.2(6)   | -3.2(5)   | -1.4(6)   |
| O3                                                                                                                                                                                                                               | 23.8(8)  | 27.7(9)  | 19.5(8)  | -12.1(7)  | 0.5(6)    | -6.8(6)   |
| O2                                                                                                                                                                                                                               | 20.6(7)  | 19.0(8)  | 24.1(8)  | -8.8(7)   | 2.0(6)    | 1.4(6)    |
| N1                                                                                                                                                                                                                               | 19.1(9)  | 13.7(9)  | 15.6(8)  | -5.1(7)   | 0.8(6)    | -2.0(7)   |
| N3                                                                                                                                                                                                                               | 17.1(8)  | 15.2(9)  | 14.6(9)  | -4.6(7)   | 1.0(6)    | -2.2(7)   |
| N2                                                                                                                                                                                                                               | 17.2(8)  | 15.3(9)  | 12.9(8)  | -4.6(7)   | 0.2(6)    | -1.5(7)   |
| O4                                                                                                                                                                                                                               | 17.8(7)  | 25.5(8)  | 16.7(7)  | -2.3(7)   | -3.7(5)   | -1.4(6)   |
| C14                                                                                                                                                                                                                              | 16.9(10) | 11.3(10) | 18.1(10) | -4.2(8)   | -1.3(7)   | -1.5(8)   |
| C5                                                                                                                                                                                                                               | 19.1(10) | 15.3(10) | 17.7(10) | -4.5(9)   | -3.8(8)   | -1.2(8)   |
| C21                                                                                                                                                                                                                              | 17.5(10) | 16.7(10) | 11.7(10) | -1.3(8)   | -0.9(7)   | -3.9(8)   |
| C2                                                                                                                                                                                                                               | 18.9(10) | 20.0(11) | 17.9(10) | -7.9(9)   | 0.0(8)    | -0.1(8)   |
| C18                                                                                                                                                                                                                              | 18.8(10) | 16.2(10) | 17.4(10) | -6.6(9)   | -3.6(8)   | 0.0(8)    |
| C9                                                                                                                                                                                                                               | 19(1)    | 15.7(10) | 16.9(10) | -5.3(9)   | -0.4(8)   | -2.5(8)   |
| C11                                                                                                                                                                                                                              | 14.3(9)  | 15.6(10) | 14.8(10) | -4.6(8)   | -2.6(7)   | -0.6(8)   |
| C8                                                                                                                                                                                                                               | 15.3(10) | 17.3(10) | 14.1(10) | -5.8(9)   | -0.5(7)   | -2.4(8)   |
| C7                                                                                                                                                                                                                               | 14.6(10) | 15.3(10) | 12.7(10) | -3.4(8)   | -2.3(7)   | -2.3(7)   |
| C22                                                                                                                                                                                                                              | 17.6(10) | 21.4(11) | 14.3(10) | -4.5(9)   | 1.3(8)    | -0.9(8)   |
| C23                                                                                                                                                                                                                              | 24.3(11) | 19.1(11) | 15.1(10) | -4.7(9)   | -0.8(8)   | -4.2(8)   |
| C25                                                                                                                                                                                                                              | 22.6(11) | 18.7(11) | 24.3(11) | -9.0(9)   | 0.9(8)    | -3.3(8)   |
| C17                                                                                                                                                                                                                              | 20(1)    | 16.3(11) | 20.9(11) | -6.1(9)   | 3.1(8)    | -1.3(8)   |
| C15                                                                                                                                                                                                                              | 25.6(11) | 21.3(11) | 16.4(10) | -4.0(9)   | -1.3(8)   | -7.6(9)   |
| C10                                                                                                                                                                                                                              | 13.6(10) | 18.6(11) | 19.1(10) | -7.4(9)   | -1.0(7)   | -1.9(8)   |
| C19                                                                                                                                                                                                                              | 19(1)    | 15.0(11) | 29.3(12) | -8.6(9)   | -2.1(8)   | -1.2(8)   |
| C1                                                                                                                                                                                                                               | 18(1)    | 16.6(10) | 14.3(10) | -5.1(9)   | -3.0(7)   | -2.8(8)   |
| C3                                                                                                                                                                                                                               | 19.1(10) | 24.7(12) | 16.1(10) | -3.8(9)   | 1.5(8)    | -5.3(8)   |
| C20                                                                                                                                                                                                                              | 20.3(11) | 31.1(13) | 40.6(14) | -15.4(12) | -1.4(9)   | -7.2(9)   |
| C27                                                                                                                                                                                                                              | 22.5(12) | 35.8(14) | 31.7(13) | -11.6(11) | 0.3(9)    | -9(1)     |
| C12                                                                                                                                                                                                                              | 13.3(10) | 15.8(10) | 20.8(11) | -8.3(9)   | 0.5(7)    | -1.0(8)   |
| C24                                                                                                                                                                                                                              | 18.0(11) | 24.7(12) | 28.2(12) | -10(1)    | 4.3(8)    | -0.7(9)   |
| C26                                                                                                                                                                                                                              | 20.4(11) | 23.9(12) | 16.4(10) | -3.4(9)   | -1.0(8)   | -6.1(9)   |
| C16                                                                                                                                                                                                                              | 27.6(12) | 21.9(12) | 22.3(11) | -5.9(10)  | -9.7(9)   | -6.0(9)   |
| C13                                                                                                                                                                                                                              | 29.8(12) | 15.4(11) | 23.2(12) | -6.0(9)   | 1.9(9)    | 1.0(9)    |

|     |          |          |          |          |           |          |
|-----|----------|----------|----------|----------|-----------|----------|
| C4  | 23.0(11) | 17.5(11) | 17.3(10) | 1.3(9)   | -3.6(8)   | -6.4(8)  |
| C6  | 15.5(10) | 16(1)    | 14.5(10) | -5.7(8)  | -3.6(7)   | -2.7(8)  |
| C28 | 24.2(13) | 37.2(15) | 57.8(18) | -5.2(14) | -12.3(11) | -1.7(11) |

**Table S8-4** Bond Lengths for **11a**.

| Atom | Atom | Length/Å   | Atom | Atom | Length/Å |
|------|------|------------|------|------|----------|
| S1   | O1   | 1.4359(14) | C21  | C25  | 1.387(3) |
| S1   | O2   | 1.4355(14) | C2   | C1   | 1.395(3) |
| S1   | N2   | 1.6249(17) | C2   | C3   | 1.382(3) |
| S1   | C14  | 1.7731(19) | C18  | C17  | 1.388(3) |
| S2   | O3   | 1.4288(15) | C9   | C8   | 1.494(3) |
| S2   | N3   | 1.6265(16) | C11  | C7   | 1.499(3) |
| S2   | O4   | 1.4426(14) | C11  | C10  | 1.535(3) |
| S2   | C21  | 1.767(2)   | C11  | C12  | 1.534(3) |
| Cl2  | C28  | 1.752(3)   | C8   | C7   | 1.361(3) |
| Cl1  | C28  | 1.761(2)   | C7   | C6   | 1.439(3) |
| N1   | C8   | 1.381(2)   | C22  | C23  | 1.384(3) |
| N1   | C1   | 1.379(3)   | C23  | C26  | 1.397(3) |
| N1   | C13  | 1.453(3)   | C25  | C24  | 1.389(3) |
| N3   | C9   | 1.476(2)   | C17  | C19  | 1.389(3) |
| N3   | C10  | 1.477(2)   | C15  | C16  | 1.385(3) |
| N2   | C12  | 1.482(2)   | C19  | C20  | 1.507(3) |
| C14  | C18  | 1.391(3)   | C19  | C16  | 1.396(3) |
| C14  | C15  | 1.391(3)   | C1   | C6   | 1.421(3) |
| C5   | C4   | 1.388(3)   | C3   | C4   | 1.403(3) |
| C5   | C6   | 1.399(3)   | C27  | C26  | 1.505(3) |
| C21  | C22  | 1.393(3)   | C24  | C26  | 1.392(3) |

**Table S8-5** Bond Angles for **11a**.

| Atom | Atom | Atom | Angle/°   | Atom | Atom | Atom | Angle/°    |
|------|------|------|-----------|------|------|------|------------|
| O1   | S1   | N2   | 107.68(9) | C12  | C11  | C10  | 111.09(16) |
| O1   | S1   | C14  | 106.95(9) | N1   | C8   | C9   | 123.87(17) |
| O2   | S1   | O1   | 119.85(8) | C7   | C8   | N1   | 110.61(17) |
| O2   | S1   | N2   | 106.43(8) | C7   | C8   | C9   | 125.49(17) |
| O2   | S1   | C14  | 108.49(9) | C8   | C7   | C11  | 122.44(17) |
| N2   | S1   | C14  | 106.79(9) | C8   | C7   | C6   | 106.94(17) |
| O3   | S2   | N3   | 107.53(9) | C6   | C7   | C11  | 130.10(18) |
| O3   | S2   | O4   | 119.77(9) | C23  | C22  | C21  | 119.20(18) |
| O3   | S2   | C21  | 107.46(9) | C22  | C23  | C26  | 121.3(2)   |
| N3   | S2   | C21  | 108.02(9) | C21  | C25  | C24  | 119.4(2)   |
| O4   | S2   | N3   | 105.79(8) | C18  | C17  | C19  | 121.12(19) |

|     |     |     |            |     |     |     |            |
|-----|-----|-----|------------|-----|-----|-----|------------|
| O4  | S2  | C21 | 107.80(9)  | C16 | C15 | C14 | 119.36(19) |
| C8  | N1  | C13 | 126.19(17) | N3  | C10 | C11 | 108.98(15) |
| C1  | N1  | C8  | 108.05(16) | C17 | C19 | C20 | 121.38(19) |
| C1  | N1  | C13 | 125.73(16) | C17 | C19 | C16 | 118.33(19) |
| C9  | N3  | S2  | 118.57(13) | C16 | C19 | C20 | 120.27(19) |
| C9  | N3  | C10 | 114.69(15) | N1  | C1  | C2  | 129.91(18) |
| C10 | N3  | S2  | 118.70(12) | N1  | C1  | C6  | 108.17(16) |
| C12 | N2  | S1  | 116.85(13) | C2  | C1  | C6  | 121.90(19) |
| C18 | C14 | S1  | 120.50(15) | C2  | C3  | C4  | 121.50(18) |
| C15 | C14 | S1  | 119.26(15) | N2  | C12 | C11 | 113.12(15) |
| C15 | C14 | C18 | 120.19(18) | C25 | C24 | C26 | 121.10(19) |
| C4  | C5  | C6  | 119.17(18) | C23 | C26 | C27 | 121.3(2)   |
| C22 | C21 | S2  | 120.57(15) | C24 | C26 | C23 | 118.36(19) |
| C25 | C21 | S2  | 118.78(16) | C24 | C26 | C27 | 120.31(19) |
| C25 | C21 | C22 | 120.61(18) | C15 | C16 | C19 | 121.35(19) |
| C3  | C2  | C1  | 117.69(19) | C5  | C4  | C3  | 120.79(19) |
| C17 | C18 | C14 | 119.62(18) | C5  | C6  | C7  | 134.84(18) |
| N3  | C9  | C8  | 105.91(16) | C5  | C6  | C1  | 118.93(17) |
| C7  | C11 | C10 | 109.17(16) | C1  | C6  | C7  | 106.22(17) |
| C7  | C11 | C12 | 108.38(15) | C12 | C28 | C11 | 112.59(13) |

**Table S8-6** Torsion Angles for **11a**.

| <b>A</b> | <b>B</b> | <b>C</b> | <b>D</b> | <b>Angle/°</b> |
|----------|----------|----------|----------|----------------|
| S1       | N2       | C12      | C11      | 97.86(17)      |
| S1       | C14      | C18      | C17      | 178.70(15)     |
| S1       | C14      | C15      | C16      | -177.30(16)    |
| S2       | N3       | C9       | C8       | 160.03(13)     |
| S2       | N3       | C10      | C11      | -143.00(14)    |
| S2       | C21      | C22      | C23      | 175.26(15)     |
| S2       | C21      | C25      | C24      | -175.45(16)    |
| O1       | S1       | N2       | C12      | -57.94(15)     |
| O1       | S1       | C14      | C18      | 2.35(19)       |
| O1       | S1       | C14      | C15      | 179.55(16)     |
| O3       | S2       | N3       | C9       | -165.57(14)    |
| O3       | S2       | N3       | C10      | 47.27(16)      |
| O3       | S2       | C21      | C22      | 174.78(16)     |
| O3       | S2       | C21      | C25      | -7.66(19)      |
| O2       | S1       | N2       | C12      | 172.37(13)     |
| O2       | S1       | C14      | C18      | 132.94(16)     |
| O2       | S1       | C14      | C15      | -49.86(19)     |

|     |     |     |     |             |
|-----|-----|-----|-----|-------------|
| N1  | C8  | C7  | C11 | 172.41(17)  |
| N1  | C8  | C7  | C6  | 0.0(2)      |
| N1  | C1  | C6  | C5  | 179.74(17)  |
| N1  | C1  | C6  | C7  | -1.2(2)     |
| N3  | S2  | C21 | C22 | -69.47(18)  |
| N3  | S2  | C21 | C25 | 108.09(17)  |
| N3  | C9  | C8  | N1  | -157.66(17) |
| N3  | C9  | C8  | C7  | 20.0(3)     |
| N2  | S1  | C14 | C18 | -112.71(17) |
| N2  | S1  | C14 | C15 | 64.49(18)   |
| O4  | S2  | N3  | C9  | -36.50(16)  |
| O4  | S2  | N3  | C10 | 176.34(14)  |
| O4  | S2  | C21 | C22 | 44.42(18)   |
| O4  | S2  | C21 | C25 | -138.02(16) |
| C14 | S1  | N2  | C12 | 56.63(16)   |
| C14 | C18 | C17 | C19 | -1.6(3)     |
| C14 | C15 | C16 | C19 | -1.4(3)     |
| C21 | S2  | N3  | C9  | 78.73(15)   |
| C21 | S2  | N3  | C10 | -68.43(16)  |
| C21 | C22 | C23 | C26 | 0.2(3)      |
| C21 | C25 | C24 | C26 | 0.1(3)      |
| C2  | C1  | C6  | C5  | -1.8(3)     |
| C2  | C1  | C6  | C7  | 177.22(18)  |
| C2  | C3  | C4  | C5  | -1.3(3)     |
| C18 | C14 | C15 | C16 | -0.1(3)     |
| C18 | C17 | C19 | C20 | 178.58(19)  |
| C18 | C17 | C19 | C16 | 0.1(3)      |
| C9  | N3  | C10 | C11 | 68.6(2)     |
| C9  | C8  | C7  | C11 | -5.5(3)     |
| C9  | C8  | C7  | C6  | -177.93(18) |
| C11 | C7  | C6  | C5  | 7.9(4)      |
| C11 | C7  | C6  | C1  | -170.86(19) |
| C8  | N1  | C1  | C2  | -177.0(2)   |
| C8  | N1  | C1  | C6  | 1.3(2)      |
| C8  | C7  | C6  | C5  | 179.6(2)    |
| C8  | C7  | C6  | C1  | 0.8(2)      |
| C7  | C11 | C10 | N3  | -46.3(2)    |
| C7  | C11 | C12 | N2  | -169.85(16) |
| C22 | C21 | C25 | C24 | 2.1(3)      |
| C22 | C23 | C26 | C27 | -177.6(2)   |

|     |     |     |     |             |
|-----|-----|-----|-----|-------------|
| C22 | C23 | C26 | C24 | 1.9(3)      |
| C25 | C21 | C22 | C23 | -2.2(3)     |
| C25 | C24 | C26 | C23 | -2.1(3)     |
| C25 | C24 | C26 | C27 | 177.5(2)    |
| C17 | C19 | C16 | C15 | 1.3(3)      |
| C15 | C14 | C18 | C17 | 1.5(3)      |
| C10 | N3  | C9  | C8  | -51.5(2)    |
| C10 | C11 | C7  | C8  | 18.3(3)     |
| C10 | C11 | C7  | C6  | -171.16(19) |
| C10 | C11 | C12 | N2  | 70.2(2)     |
| C1  | N1  | C8  | C9  | 177.18(18)  |
| C1  | N1  | C8  | C7  | -0.8(2)     |
| C1  | C2  | C3  | C4  | 0.6(3)      |
| C3  | C2  | C1  | N1  | 179.02(19)  |
| C3  | C2  | C1  | C6  | 0.9(3)      |
| C20 | C19 | C16 | C15 | -177.1(2)   |
| C12 | C11 | C7  | C8  | -102.8(2)   |
| C12 | C11 | C7  | C6  | 67.7(3)     |
| C12 | C11 | C10 | N3  | 73.13(19)   |
| C13 | N1  | C8  | C9  | -5.0(3)     |
| C13 | N1  | C8  | C7  | 177.01(19)  |
| C13 | N1  | C1  | C2  | 5.1(3)      |
| C13 | N1  | C1  | C6  | -176.55(18) |
| C4  | C5  | C6  | C7  | -177.6(2)   |
| C4  | C5  | C6  | C1  | 1.1(3)      |
| C6  | C5  | C4  | C3  | 0.4(3)      |

**Table S8-7** Hydrogen Atom Coordinates ( $\text{\AA}\times 10^4$ ) and Isotropic Displacement Parameters ( $\text{\AA}^2\times 10^3$ ) for **11a**.

| Atom | <i>x</i> | <i>y</i> | <i>z</i> | U(eq) |
|------|----------|----------|----------|-------|
| H2   | 830      | 2397     | 1230     | 18    |
| H5   | -822     | 1949     | 5167     | 21    |
| H2A  | -3781    | 5242     | 5660     | 23    |
| H18  | -898     | 95       | 4373     | 21    |
| H9A  | -531     | 6910     | 2095     | 21    |
| H9B  | 823      | 6629     | 2733     | 21    |
| H11  | 1403     | 2975     | 3574     | 18    |
| H22  | 1955     | 8196     | 1156     | 22    |
| H23  | 4023     | 8888     | 1214     | 23    |
| H25  | 4042     | 5821     | -226     | 26    |
| H17  | -3161    | -349     | 4582     | 23    |

|      |       |       |      |    |
|------|-------|-------|------|----|
| H15  | -951  | 831   | 1161 | 25 |
| H10A | 2388  | 4692  | 2738 | 20 |
| H10B | 2272  | 4168  | 1797 | 20 |
| H3   | -4126 | 3335  | 6706 | 25 |
| H20A | -4911 | -1035 | 2991 | 44 |
| H20B | -5475 | 317   | 2637 | 44 |
| H20C | -5292 | -369  | 3858 | 44 |
| H27A | 6825  | 8834  | 1    | 44 |
| H27B | 7394  | 7544  | 669  | 44 |
| H27C | 6600  | 8426  | 1261 | 44 |
| H12A | -669  | 2636  | 2912 | 19 |
| H12B | -433  | 3702  | 1876 | 19 |
| H24  | 6106  | 6529  | -169 | 29 |
| H16  | -3242 | 462   | 1380 | 28 |
| H13A | -1893 | 7185  | 4526 | 35 |
| H13B | -3256 | 6989  | 4109 | 35 |
| H13C | -2031 | 7477  | 3286 | 35 |
| H4   | -2644 | 1711  | 6485 | 24 |
| H28A | 6579  | 3000  | 3917 | 50 |
| H28B | 6793  | 2625  | 2862 | 50 |

---

## Experimental

Single crystals of  $C_{28}H_{31}Cl_2N_3O_4S_2$  [**11a**] were recrystallised from  $CH_2Cl_2$  mounted in inert oil and transferred to the cold gas stream of the diffractometer.

### Crystal structure determination of **11a**

**Crystal Data.**  $C_{28}H_{31}Cl_2N_3O_4S_2$ ,  $M = 608.58$ , triclinic,  $a = 9.7402(4)$  Å,  $b = 11.9977(7)$  Å,  $c = 13.1123(5)$  Å,  $\alpha = 71.536(4)^\circ$ ,  $\beta = 83.542(4)^\circ$ ,  $\gamma = 81.195(4)^\circ$ ,  $U = 1432.95(12)$  Å<sup>3</sup>,  $T = 106.6$ , space group P-1 (no. 2),  $Z = 2$ ,  $\mu(\text{Mo K}\alpha) = 0.412$ , 9944 reflections measured, 5606 unique ( $R_{\text{int}} = 0.0244$ ) which were used in all calculations. The final  $wR(F_2)$  was 0.0899 (all data).

## 9. NMR Spectrum

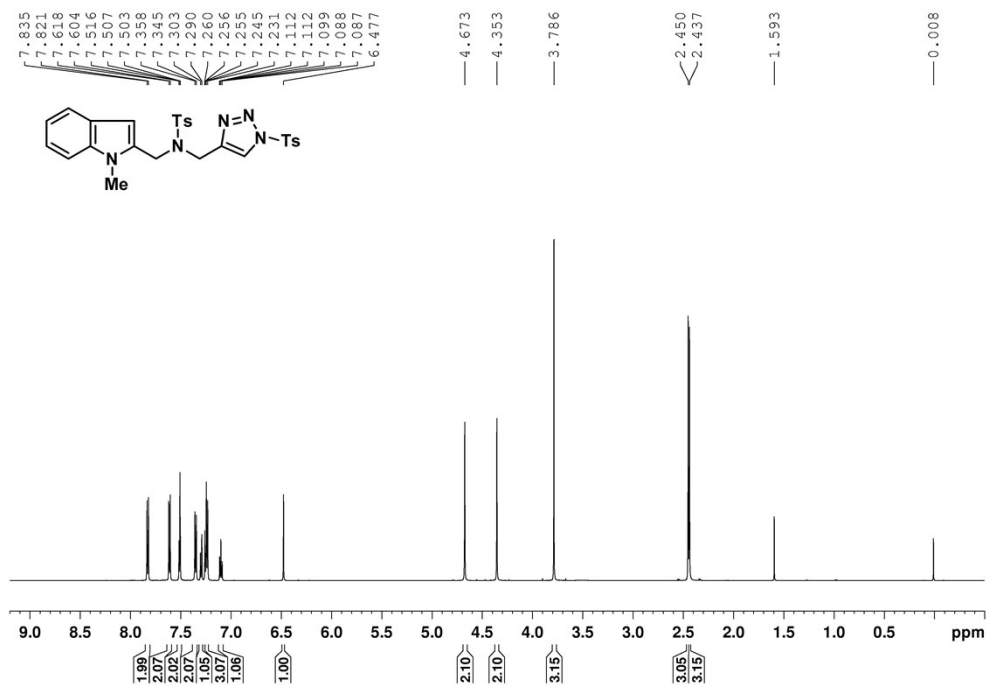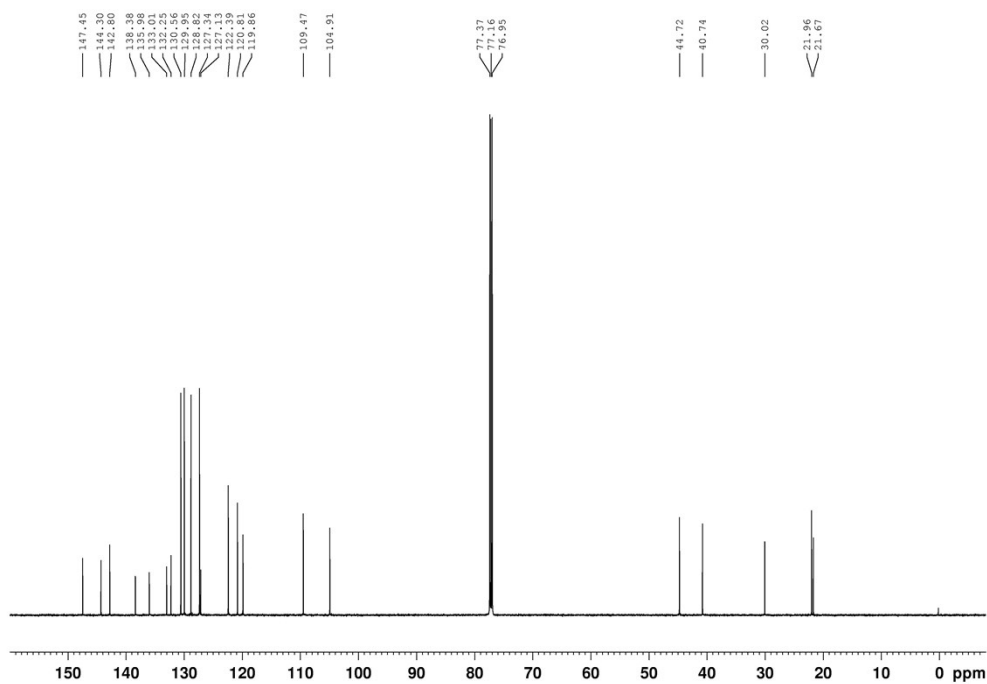

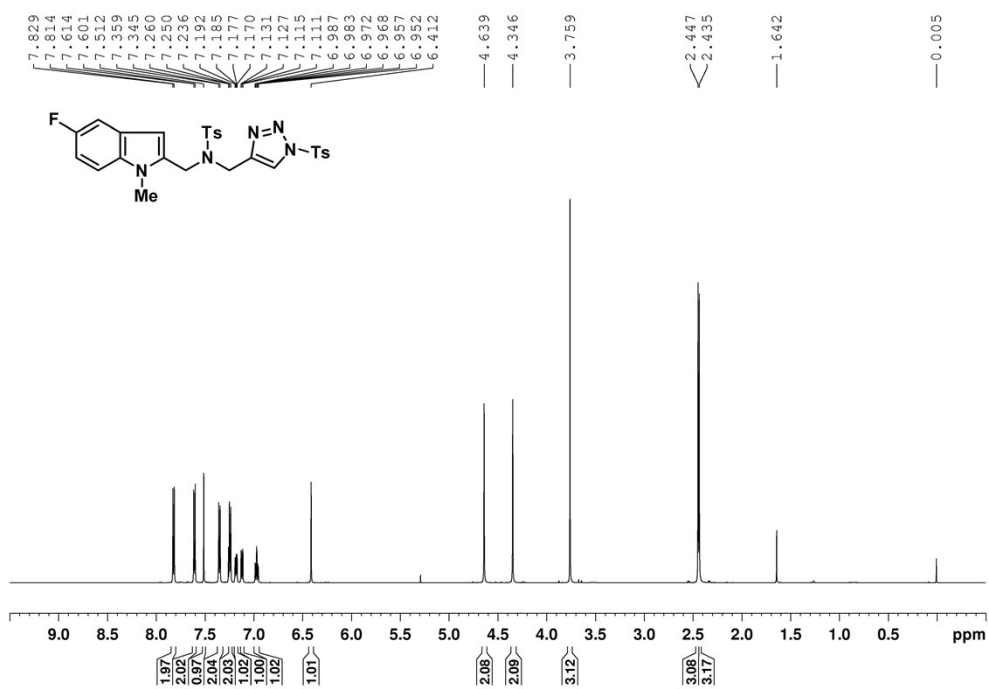

<sup>1</sup>H NMR Spectrum for **6b** (CDCl<sub>3</sub>, 600 MHz)

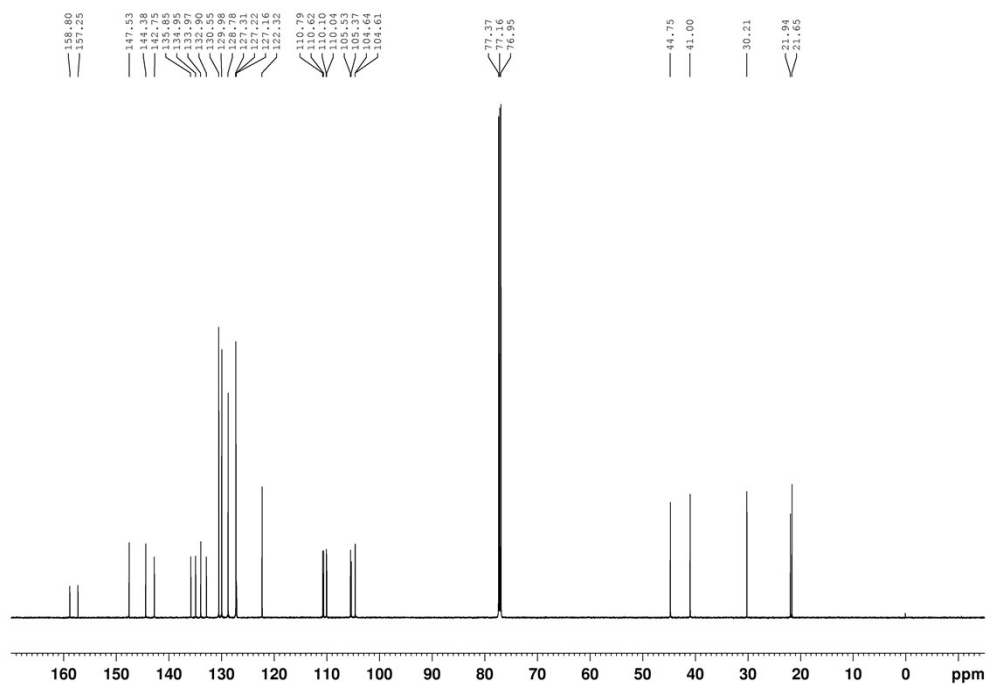

<sup>13</sup>C NMR Spectrum for **6b** (CDCl<sub>3</sub>, 150 MHz)



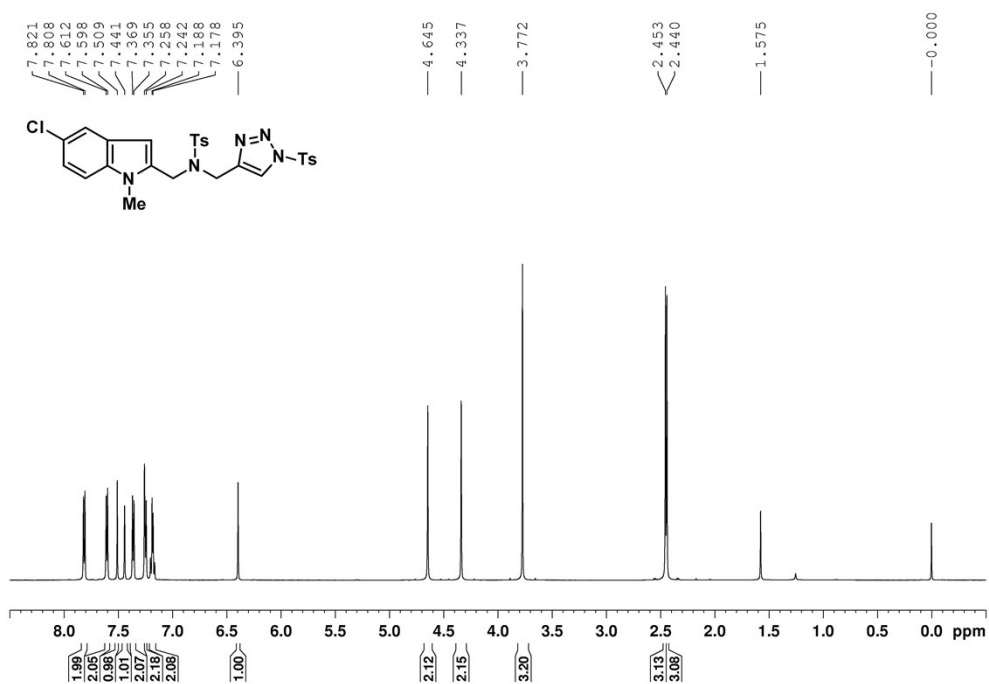

<sup>1</sup>H NMR Spectrum for **6c** (CDCl<sub>3</sub>, 600 MHz)

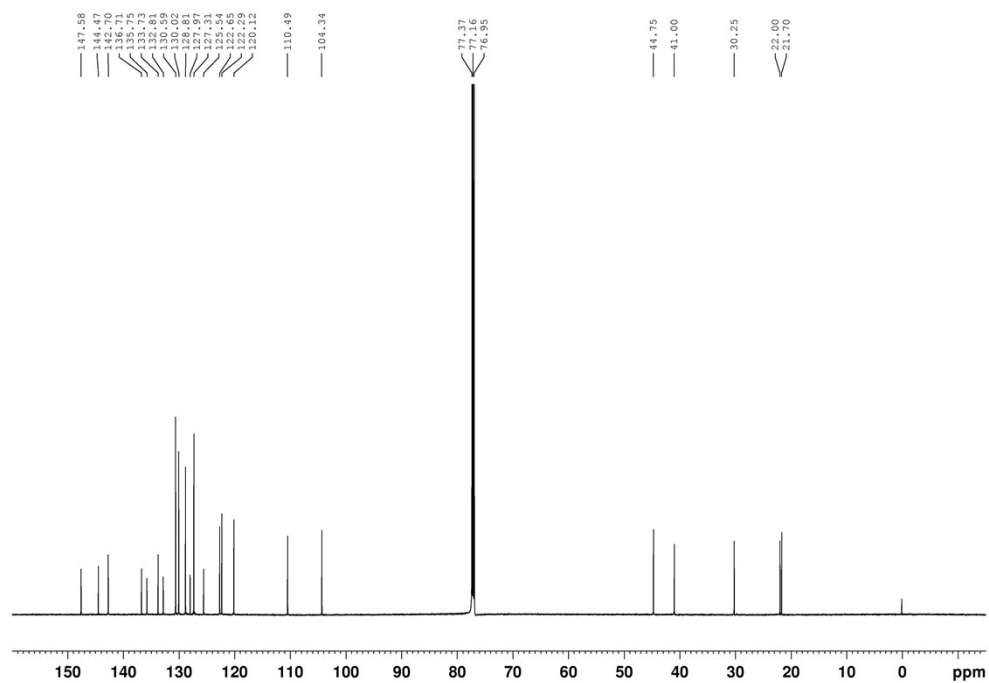

<sup>13</sup>C NMR Spectrum for **6c** (CDCl<sub>3</sub>, 150 MHz)

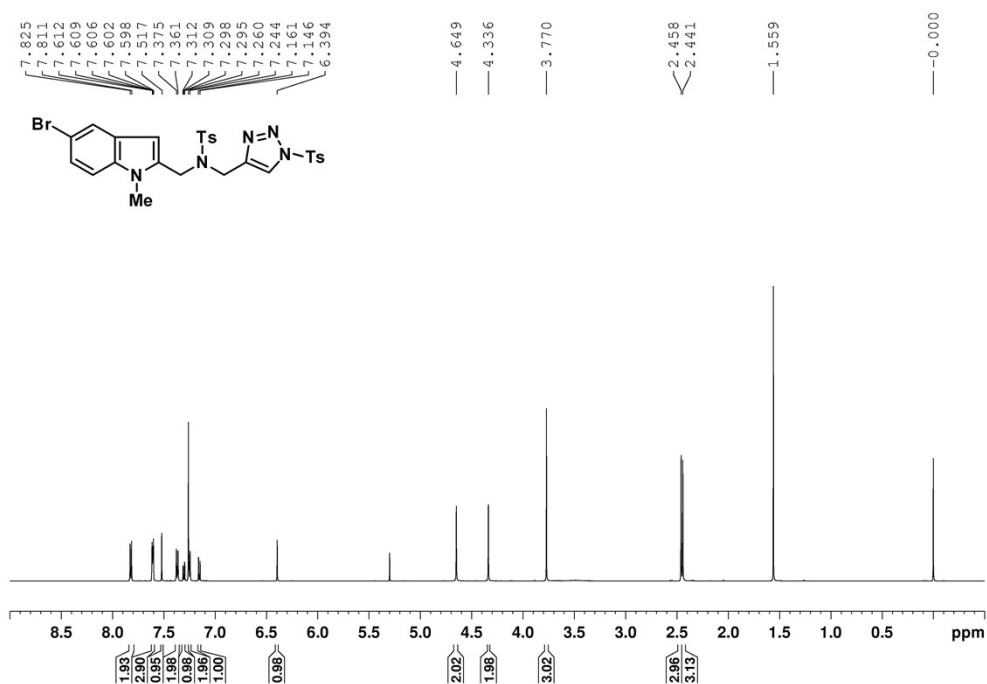

<sup>1</sup>H NMR Spectrum for **6d** (CDCl<sub>3</sub>, 600 MHz)

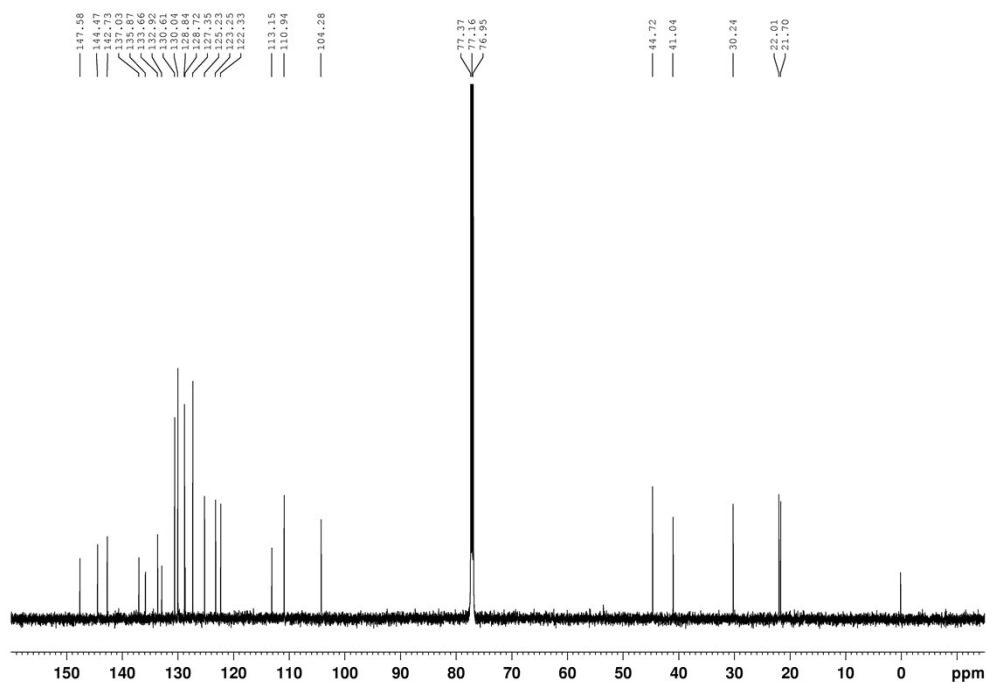

<sup>13</sup>C NMR Spectrum for **6d** (CDCl<sub>3</sub>, 150 MHz)

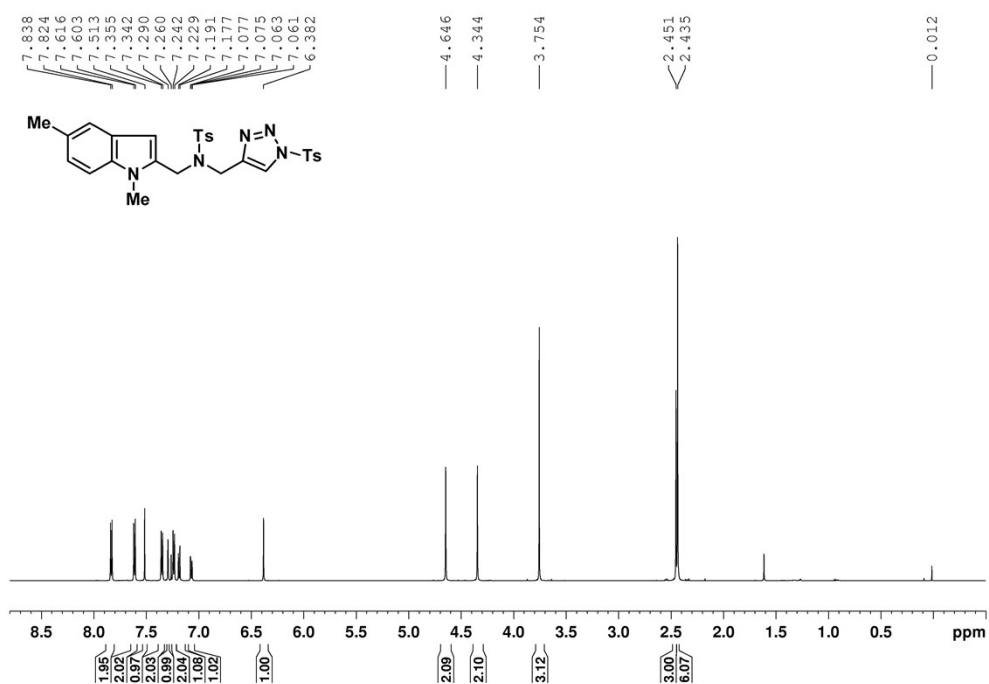

<sup>1</sup>H NMR Spectrum for **6e** (CDCl<sub>3</sub>, 600 MHz)

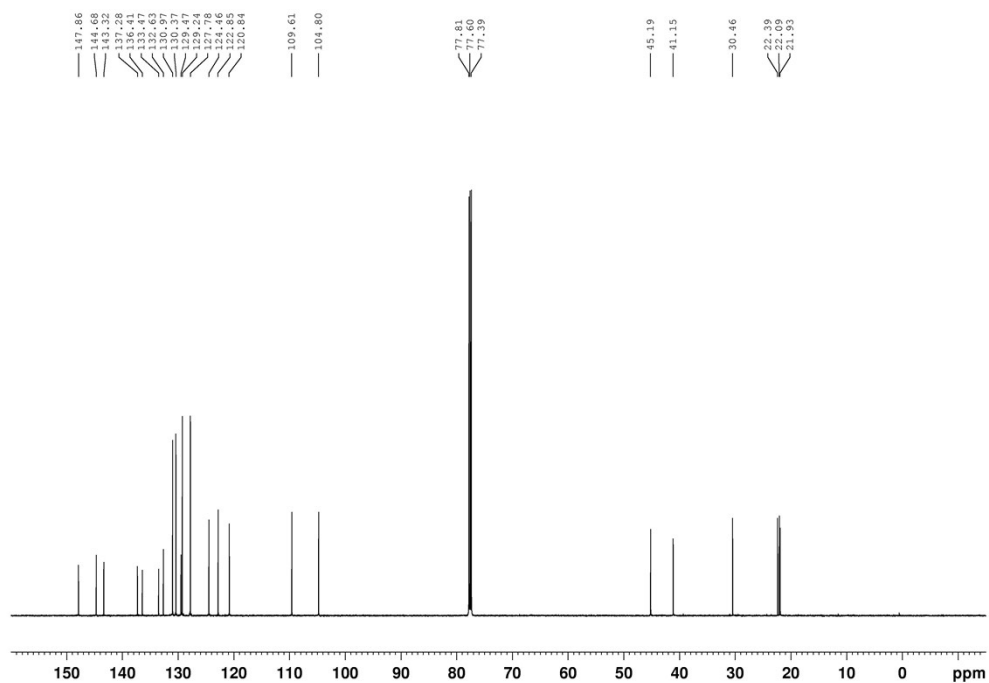

<sup>13</sup>C NMR Spectrum for **6e** (CDCl<sub>3</sub>, 150 MHz)

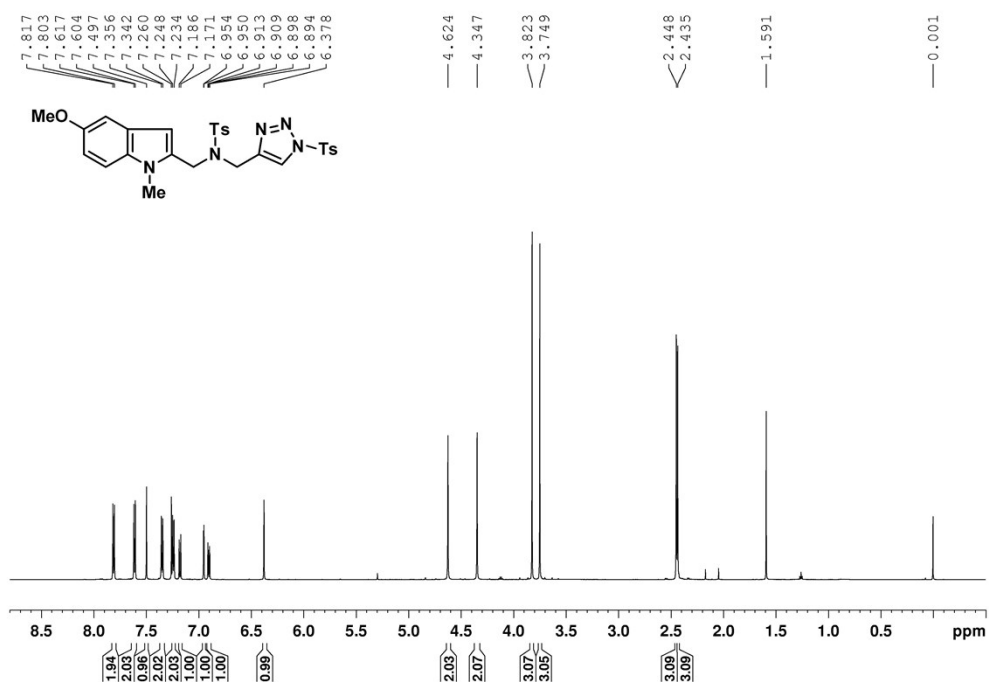

<sup>1</sup>H NMR Spectrum for **6f** (CDCl<sub>3</sub>, 600 MHz)

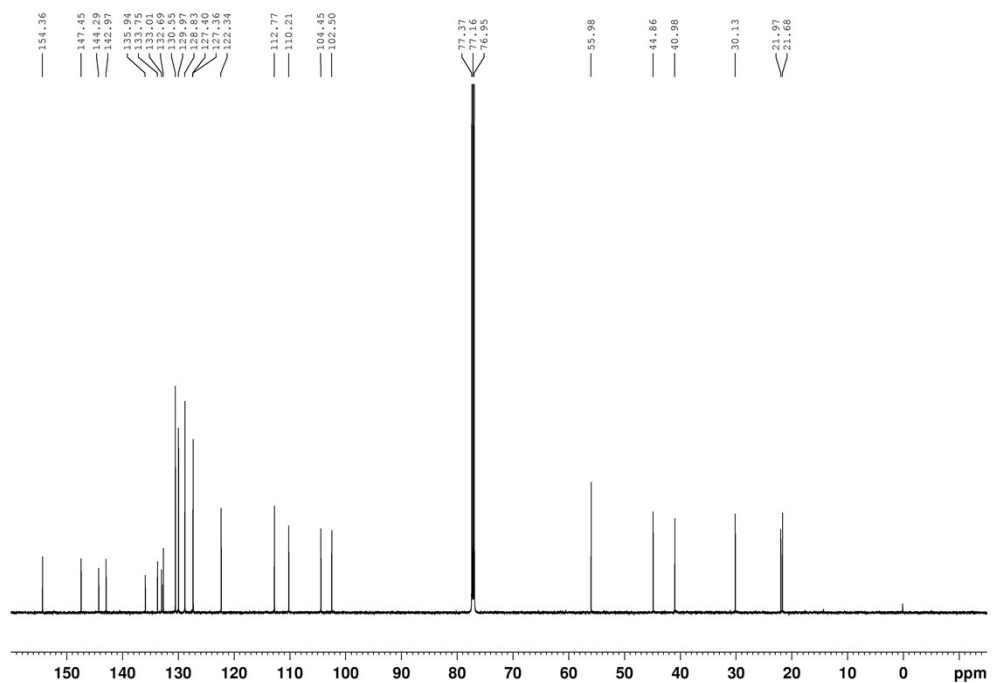

<sup>13</sup>C NMR Spectrum for **6f** (CDCl<sub>3</sub>, 150 MHz)

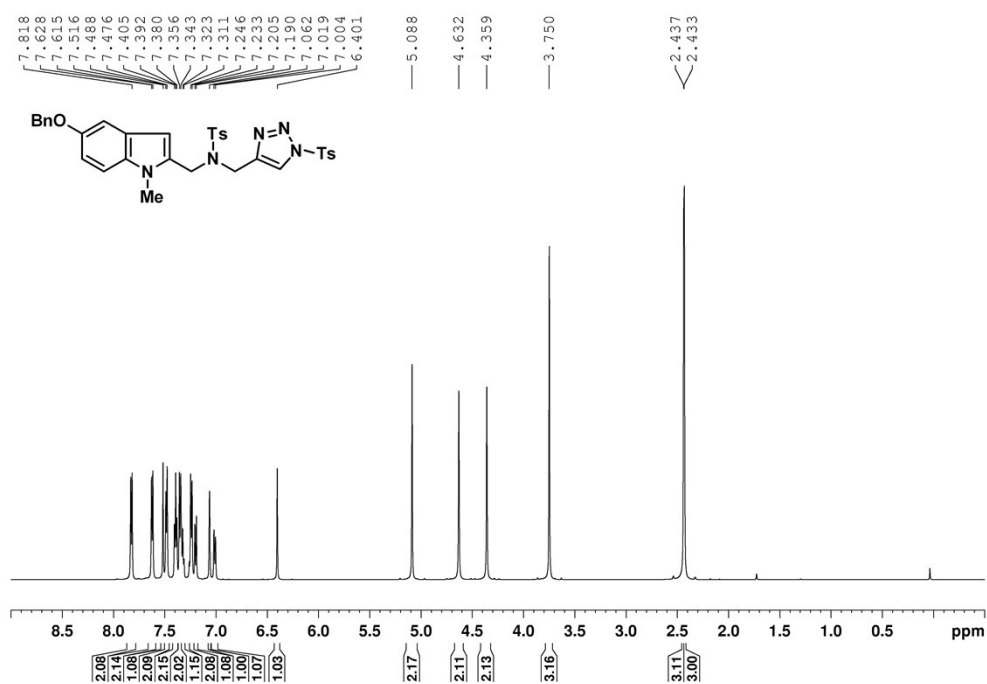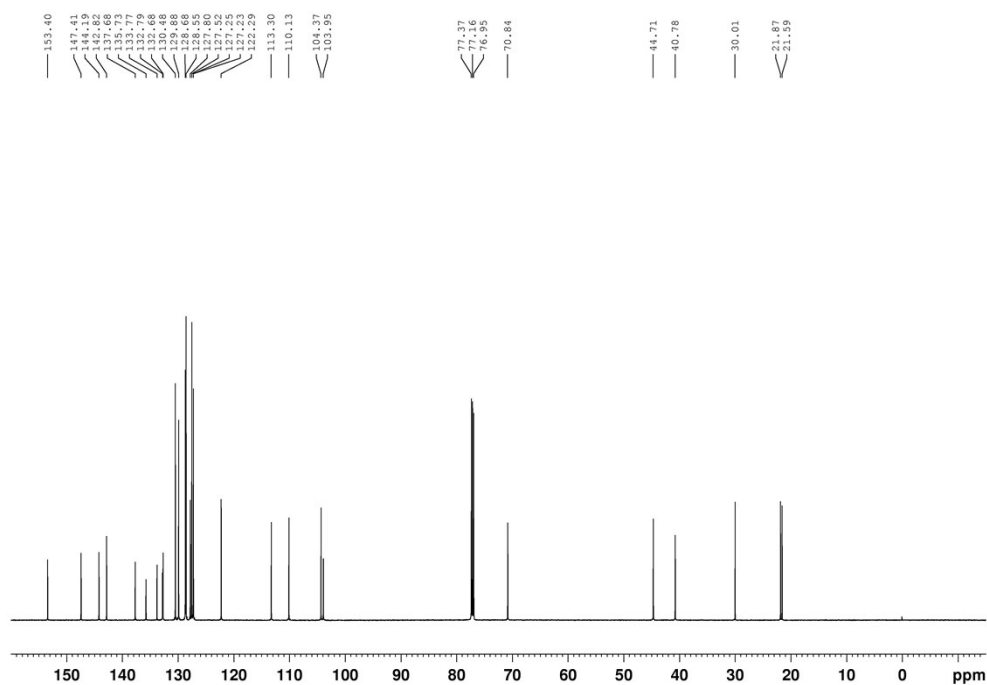

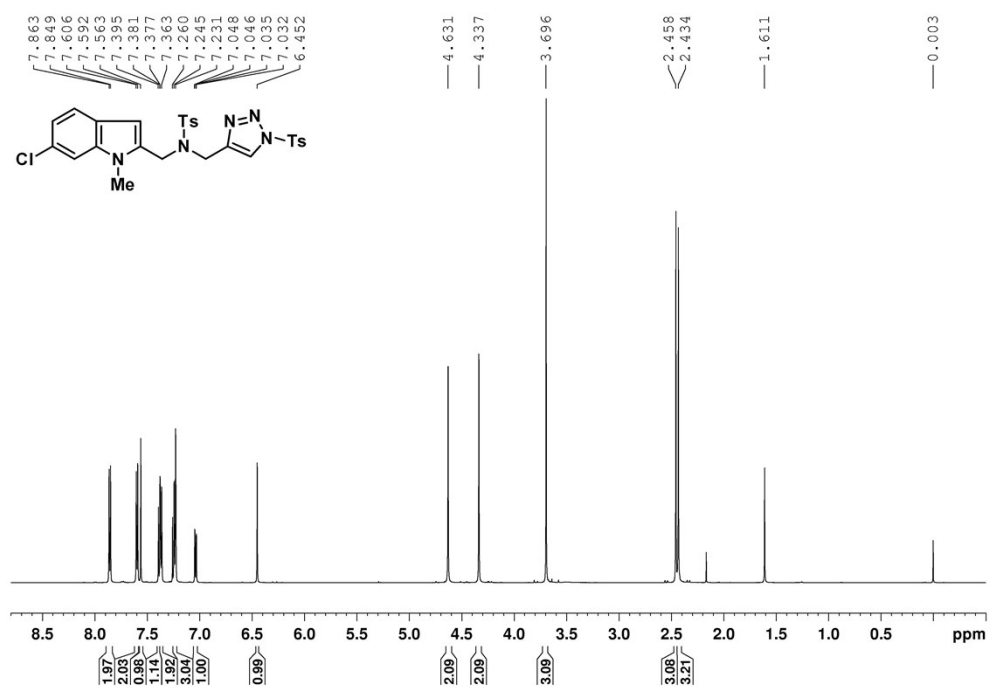

<sup>1</sup>H NMR Spectrum for **6h** (CDCl<sub>3</sub>, 600 MHz)

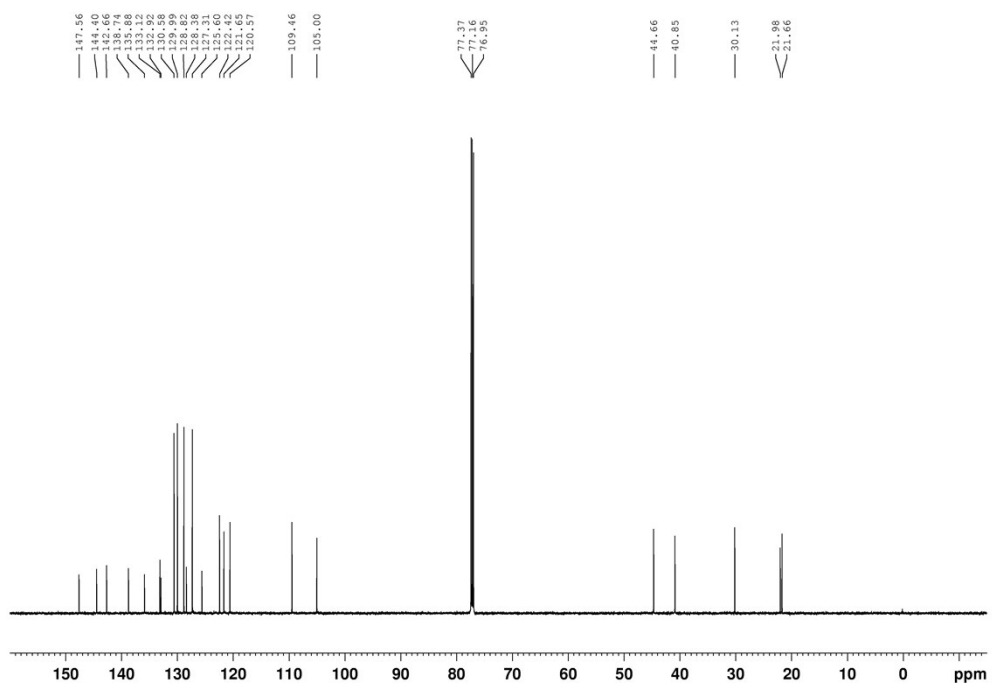

<sup>13</sup>C NMR Spectrum for **6h** (CDCl<sub>3</sub>, 150 MHz)

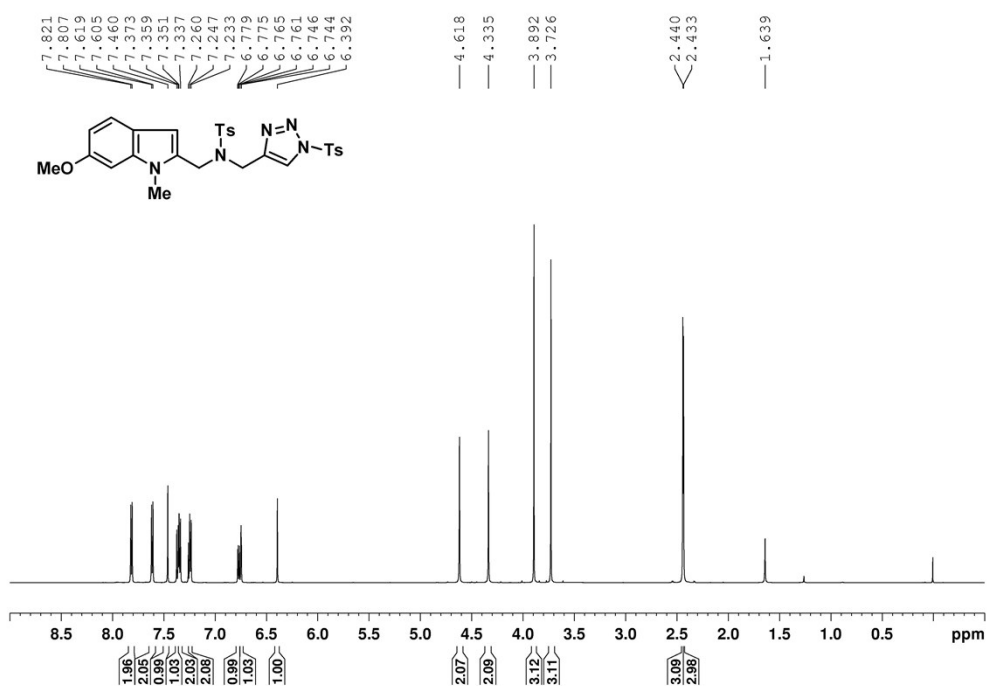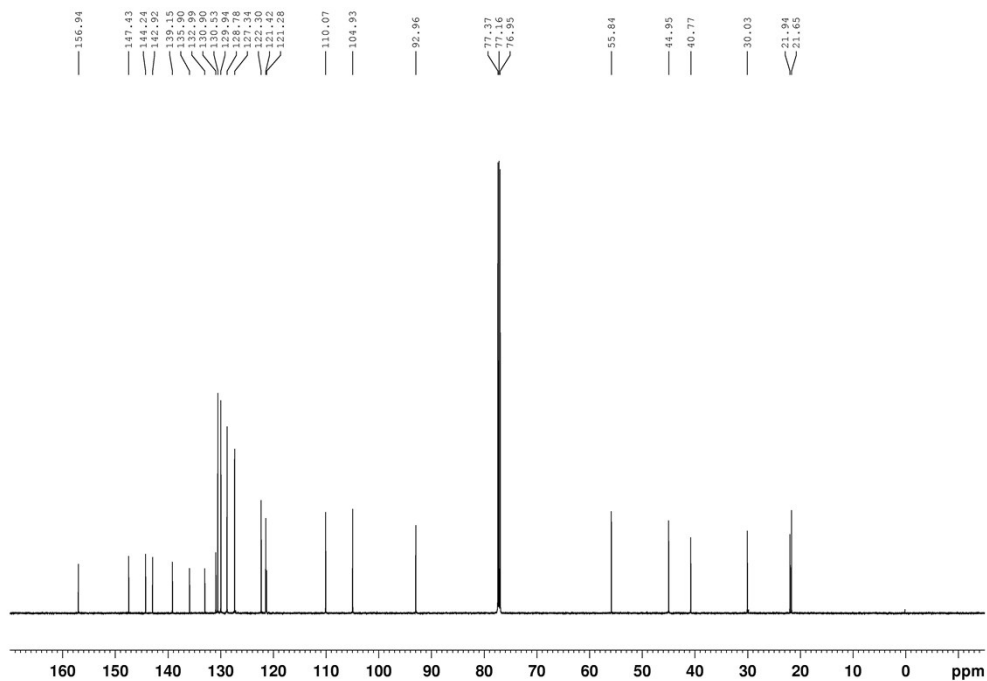

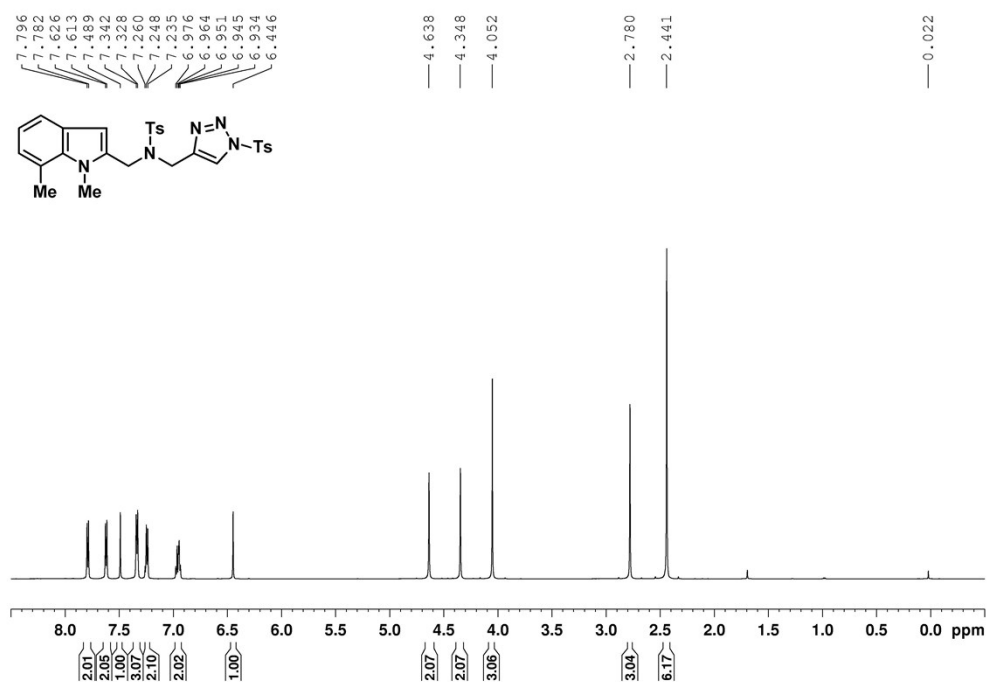

<sup>1</sup>H NMR Spectrum for 6j (CDCl<sub>3</sub>, 600 MHz)

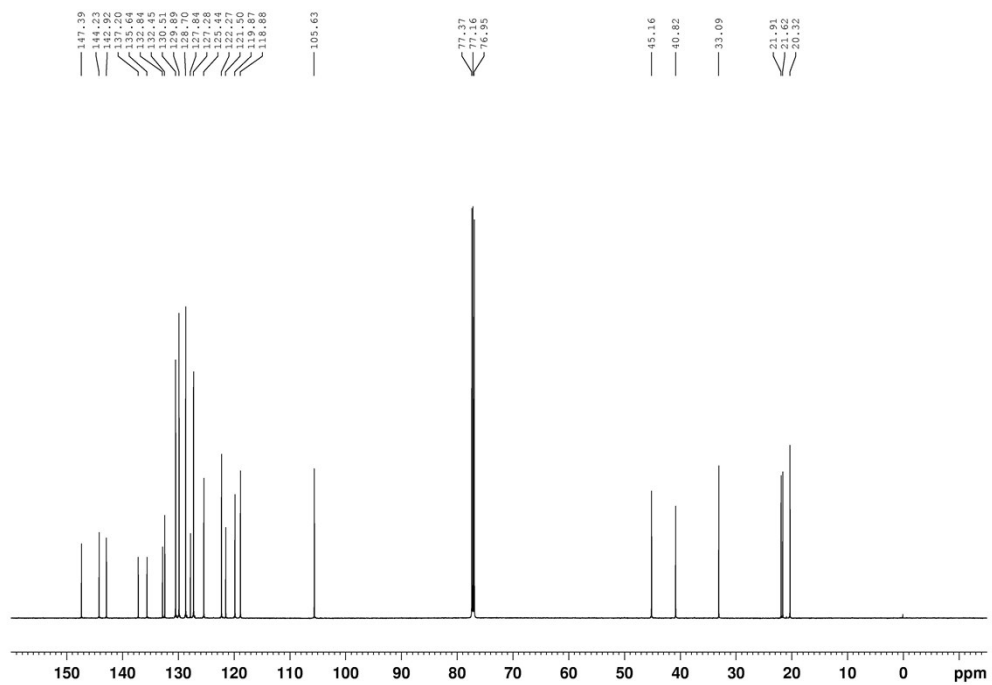

<sup>13</sup>C NMR Spectrum for 6j (CDCl<sub>3</sub>, 150 MHz)



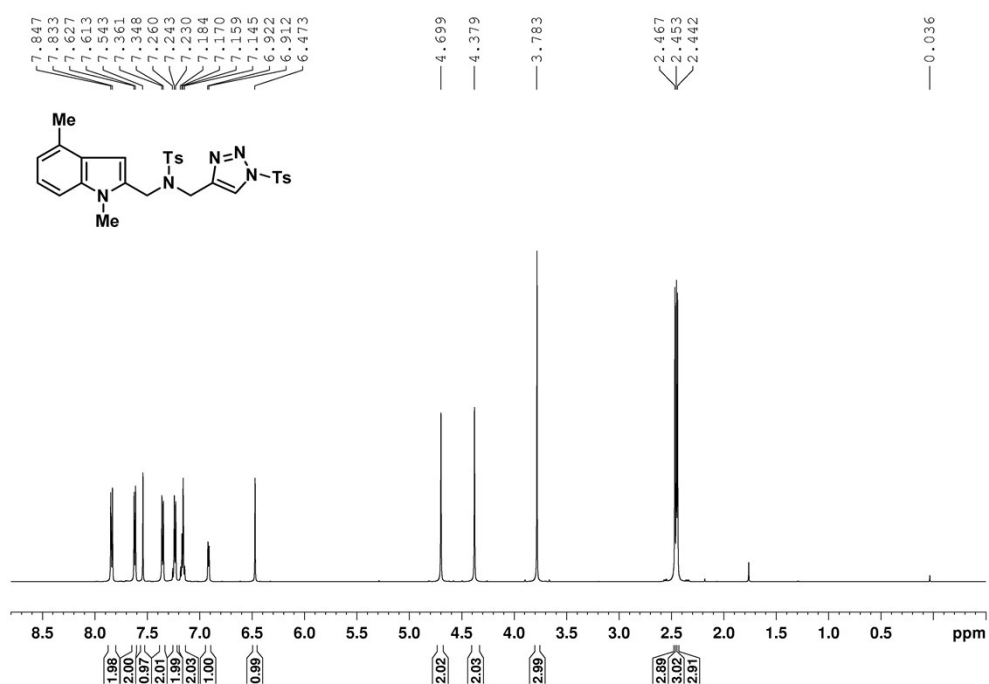

**<sup>1</sup>H NMR Spectrum for **6k** (CDCl<sub>3</sub>, 600 MHz)**

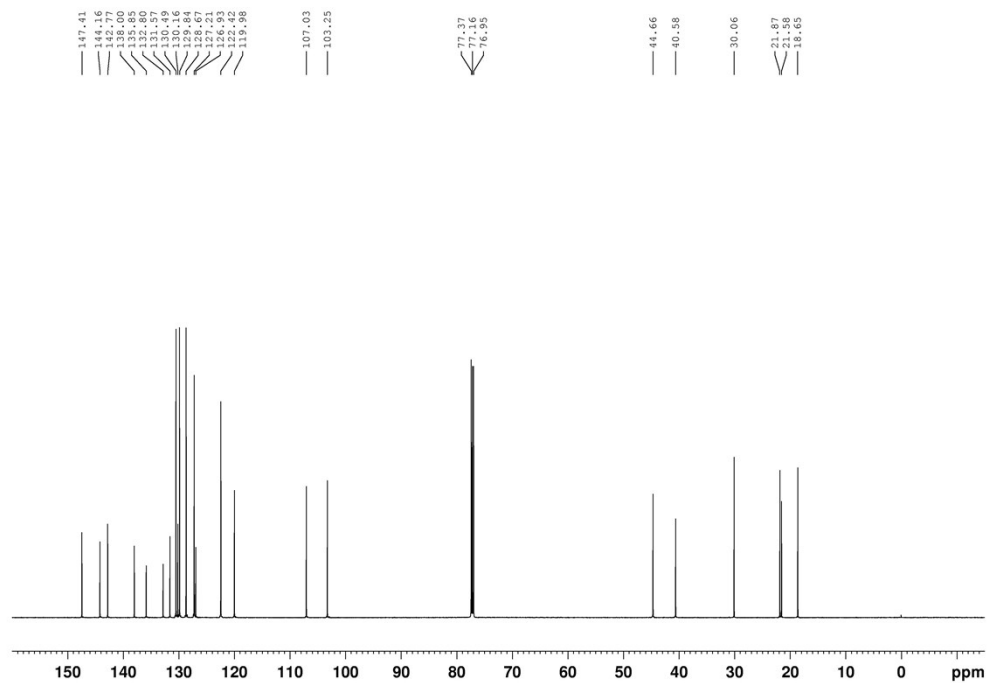

**<sup>13</sup>C NMR Spectrum for **6k** (CDCl<sub>3</sub>, 150 MHz)**

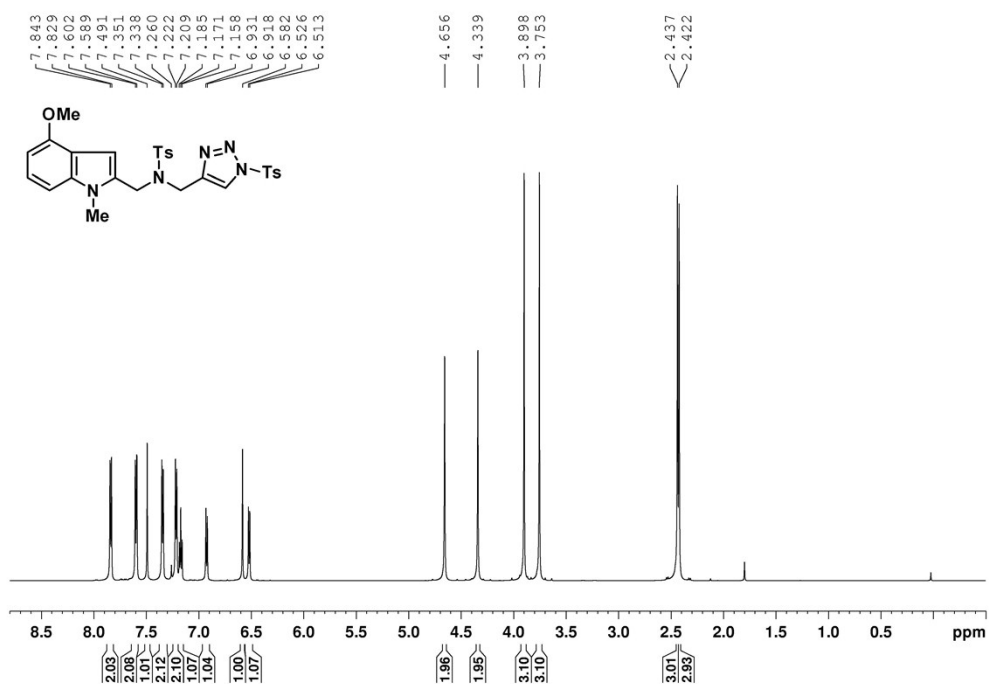

<sup>1</sup>H NMR Spectrum for **6I** (CDCl<sub>3</sub>, 600 MHz)

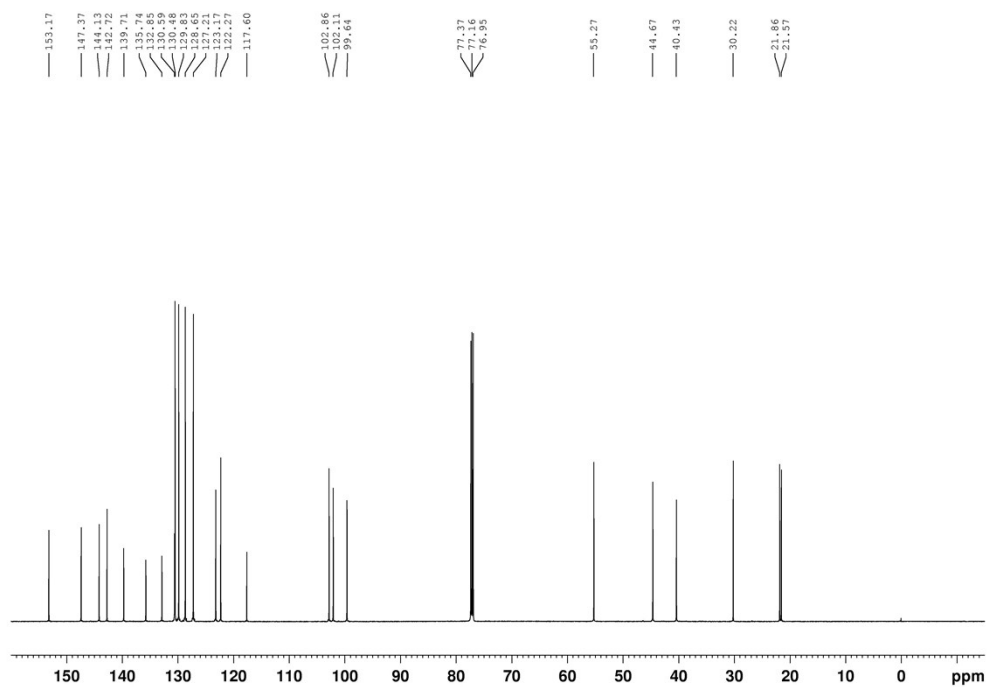

<sup>13</sup>C NMR Spectrum for **6I** (CDCl<sub>3</sub>, 150 MHz)

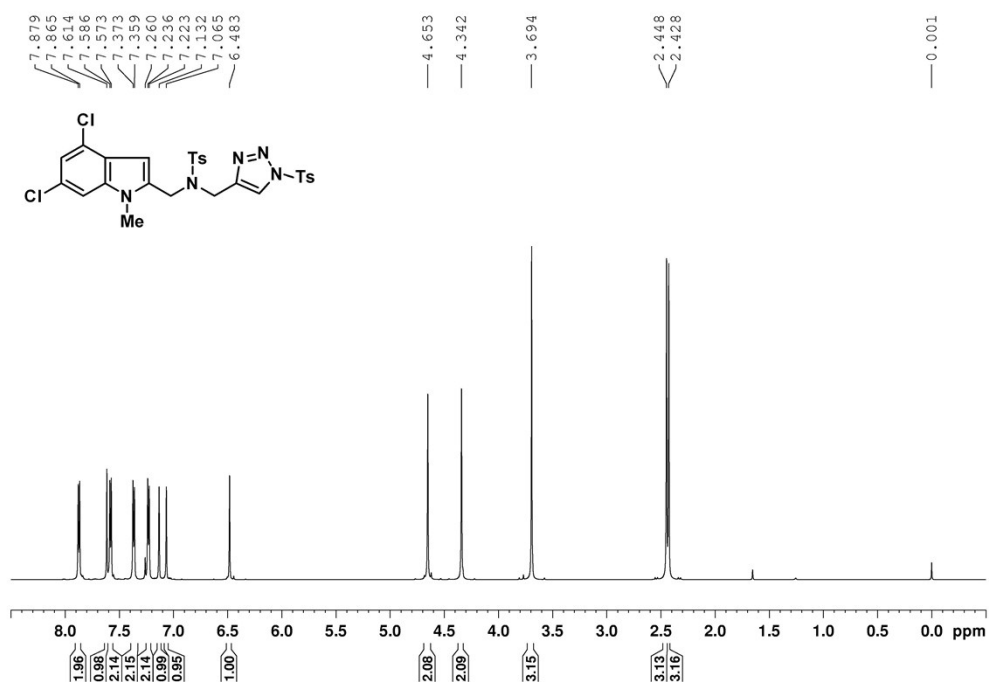

<sup>1</sup>H NMR Spectrum for **6m** (CDCl<sub>3</sub>, 600 MHz)

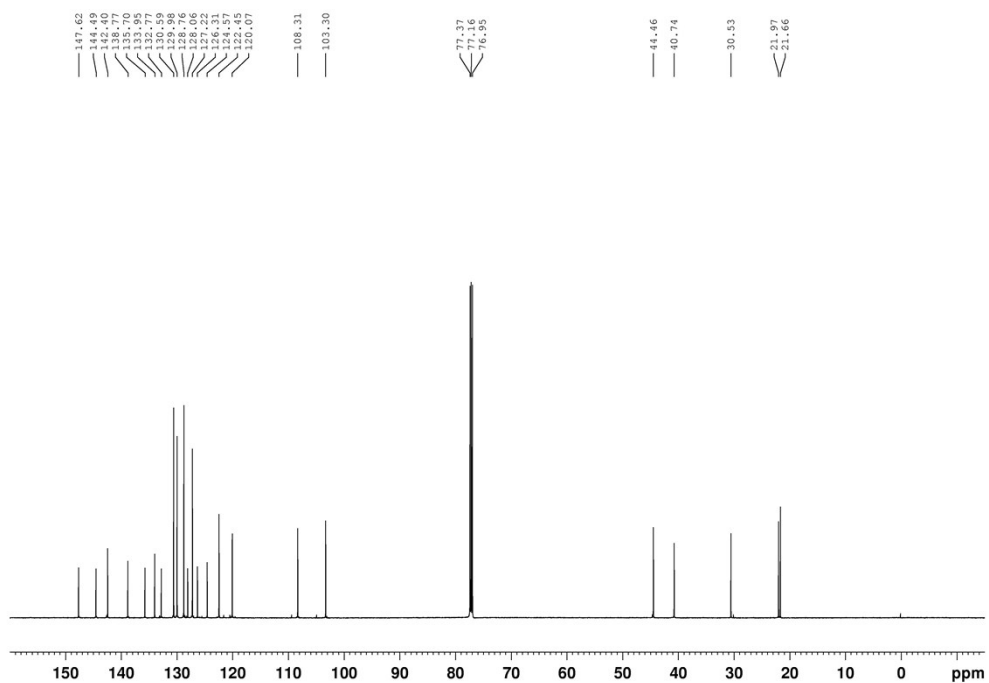

<sup>13</sup>C NMR Spectrum for **6m** (CDCl<sub>3</sub>, 150 MHz)

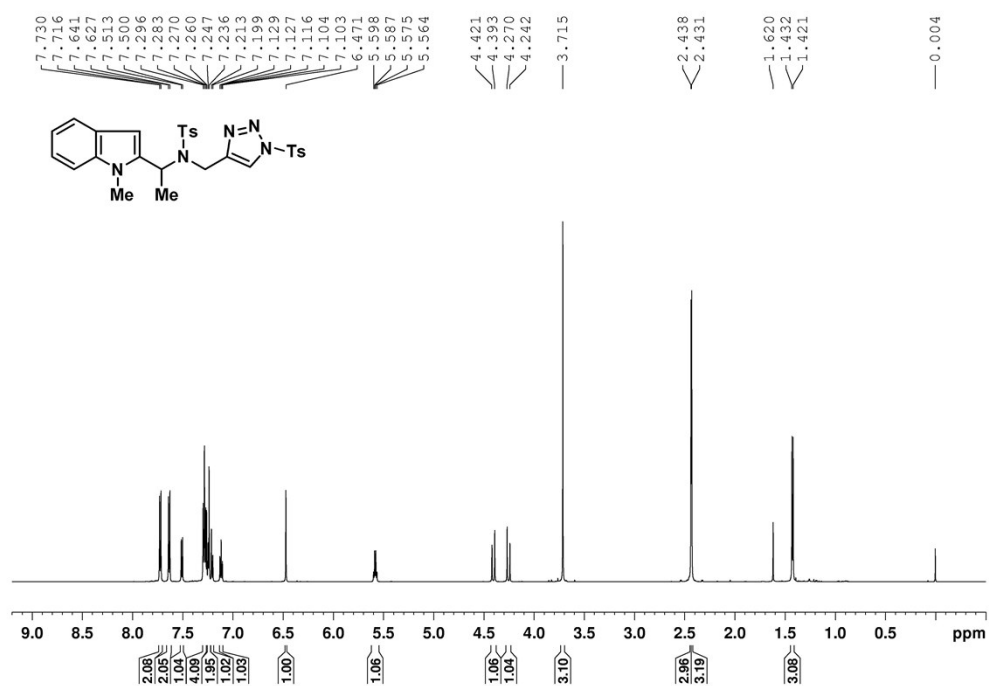

<sup>1</sup>H NMR Spectrum for **6n** (CDCl<sub>3</sub>, 600 MHz)

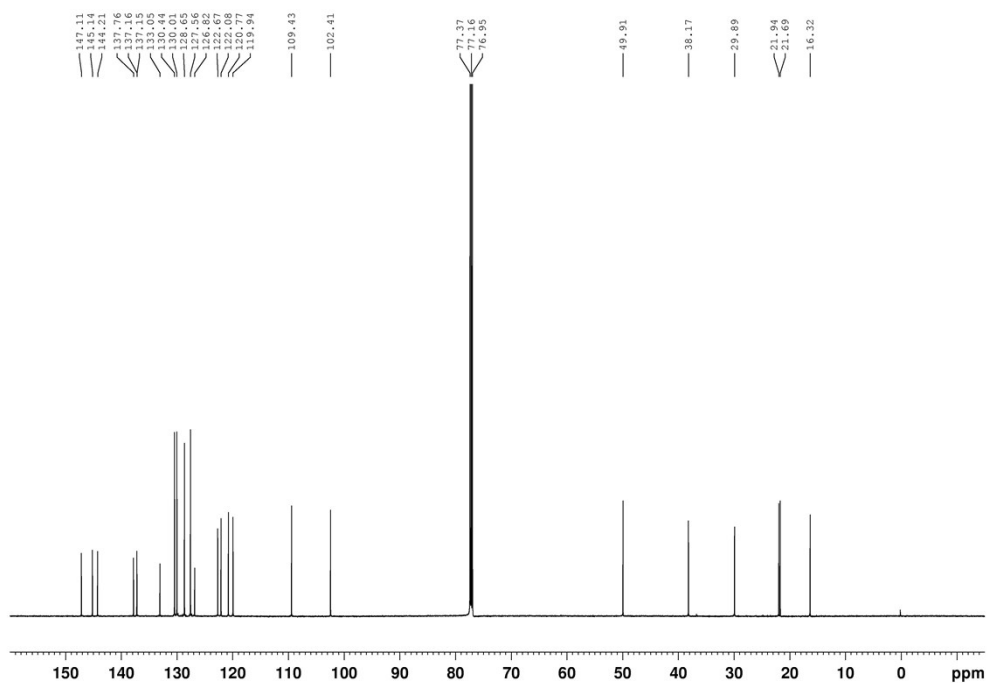

<sup>13</sup>C NMR Spectrum for **6n** (CDCl<sub>3</sub>, 150 MHz)

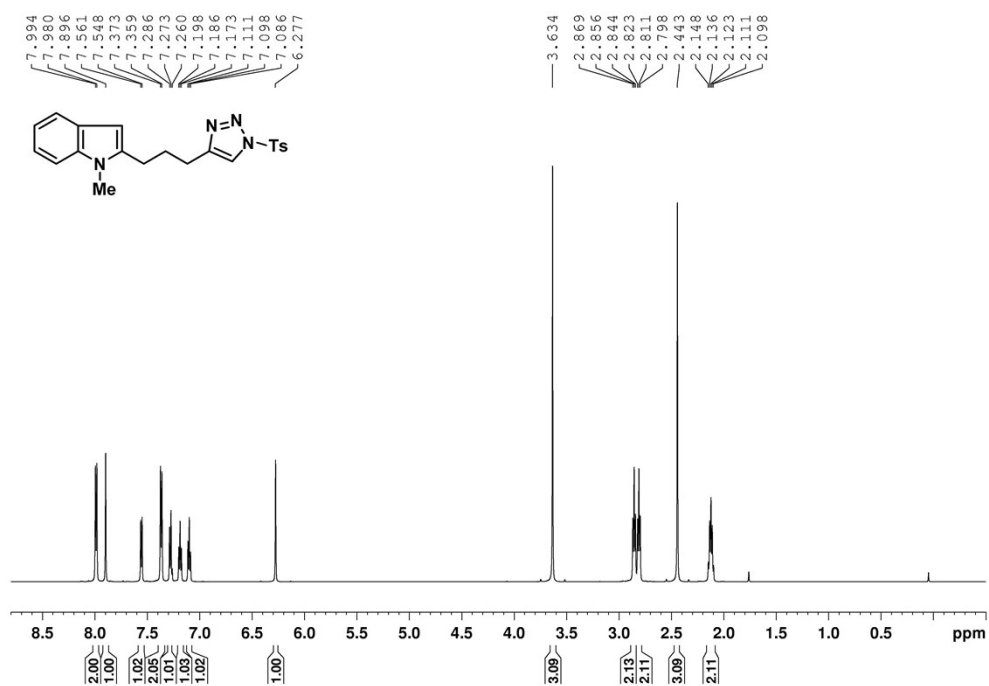

<sup>1</sup>H NMR Spectrum for **6o** (CDCl<sub>3</sub>, 600 MHz)

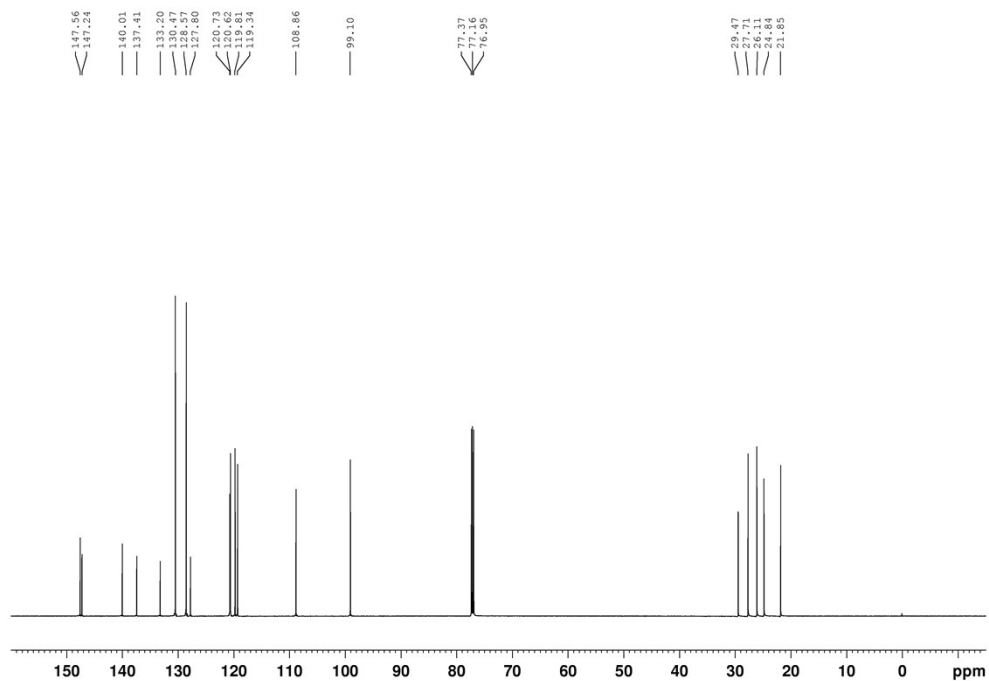

<sup>13</sup>C NMR Spectrum for **6o** (CDCl<sub>3</sub>, 150 MHz)

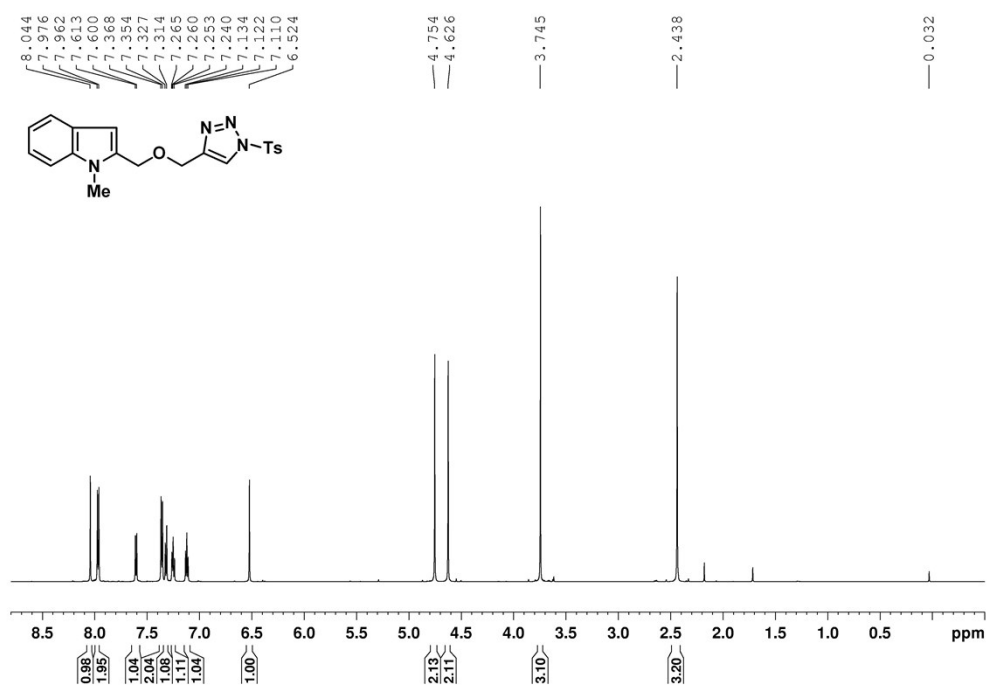

<sup>1</sup>H NMR Spectrum for **6p** (CDCl<sub>3</sub>, 600 MHz)

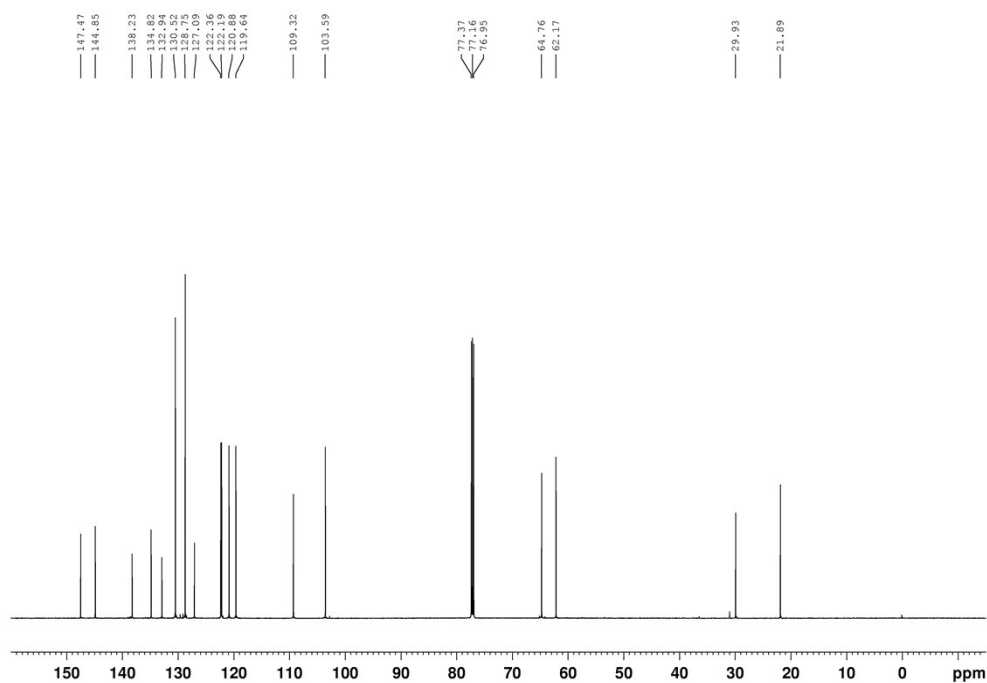

<sup>13</sup>C NMR Spectrum for **6p** (CDCl<sub>3</sub>, 150 MHz)

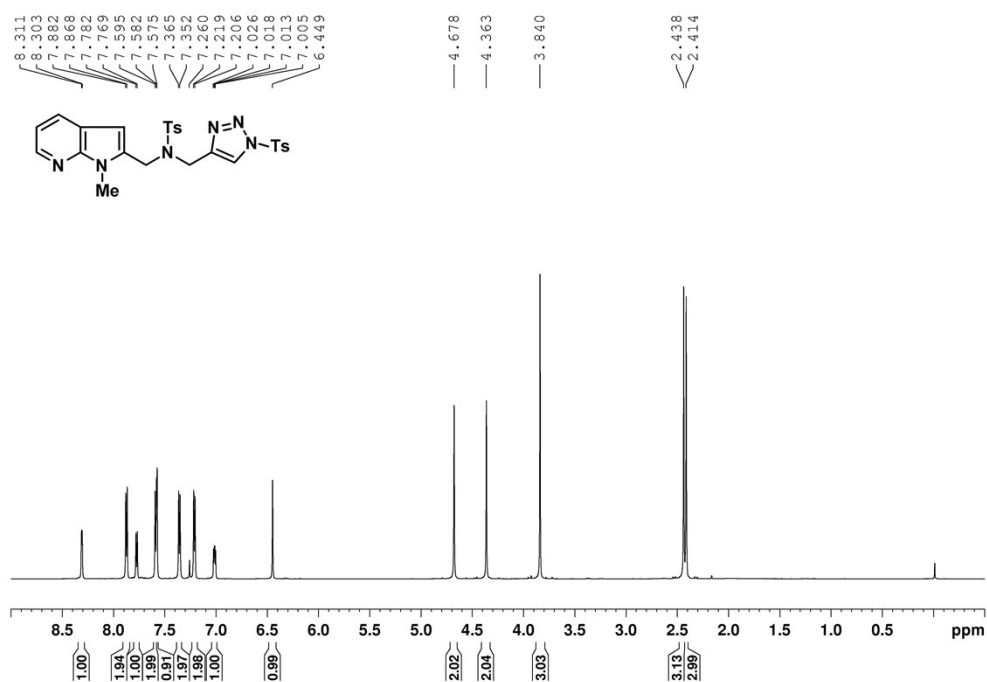

<sup>1</sup>H NMR Spectrum for **6q** (CDCl<sub>3</sub>, 600 MHz)

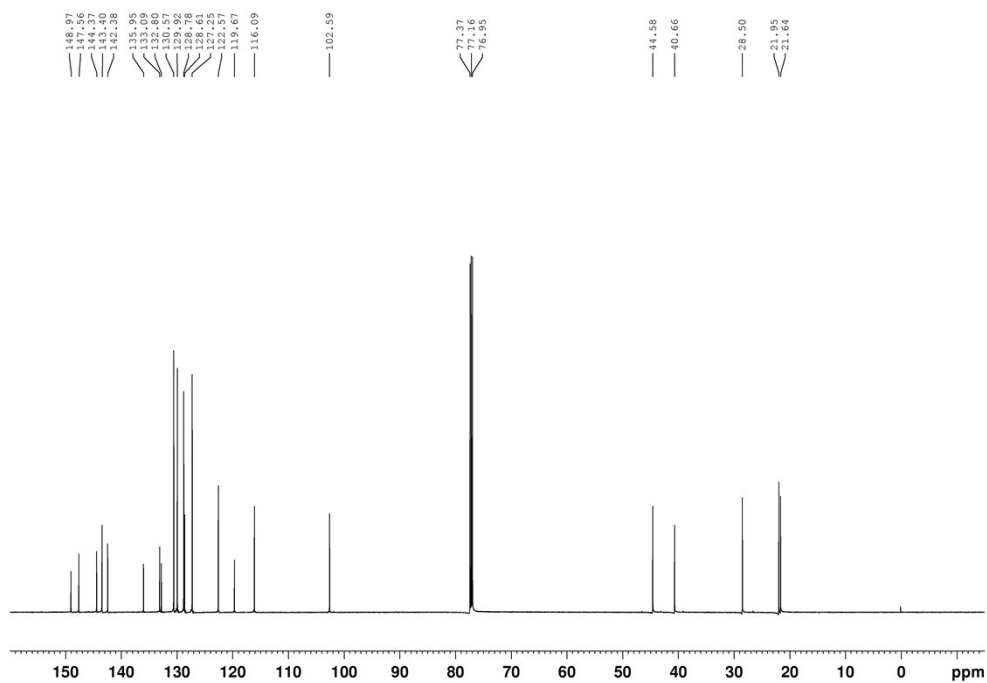

<sup>13</sup>C NMR Spectrum for **6q** (CDCl<sub>3</sub>, 150 MHz)

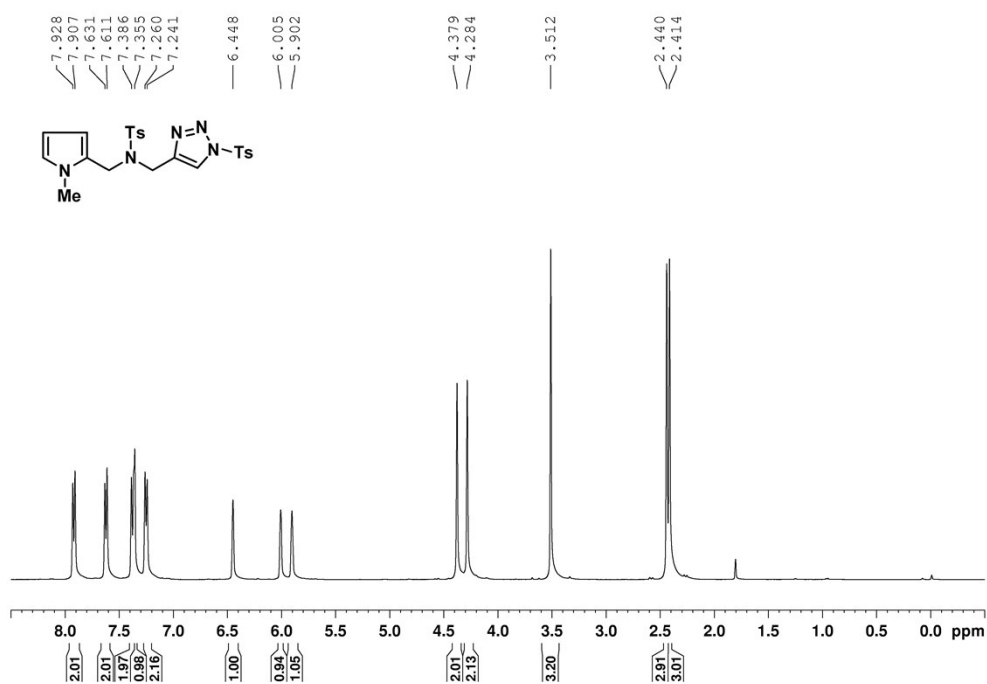

<sup>1</sup>H NMR Spectrum for **6r** (CDCl<sub>3</sub>, 400 MHz)

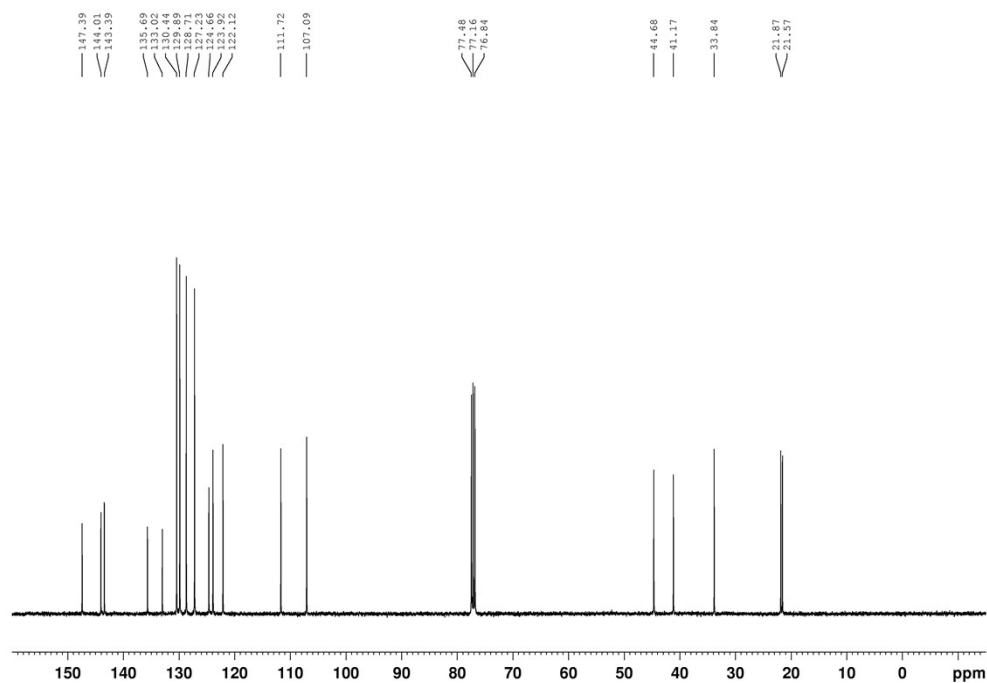

<sup>13</sup>C NMR Spectrum for **6r** (CDCl<sub>3</sub>, 100 MHz)



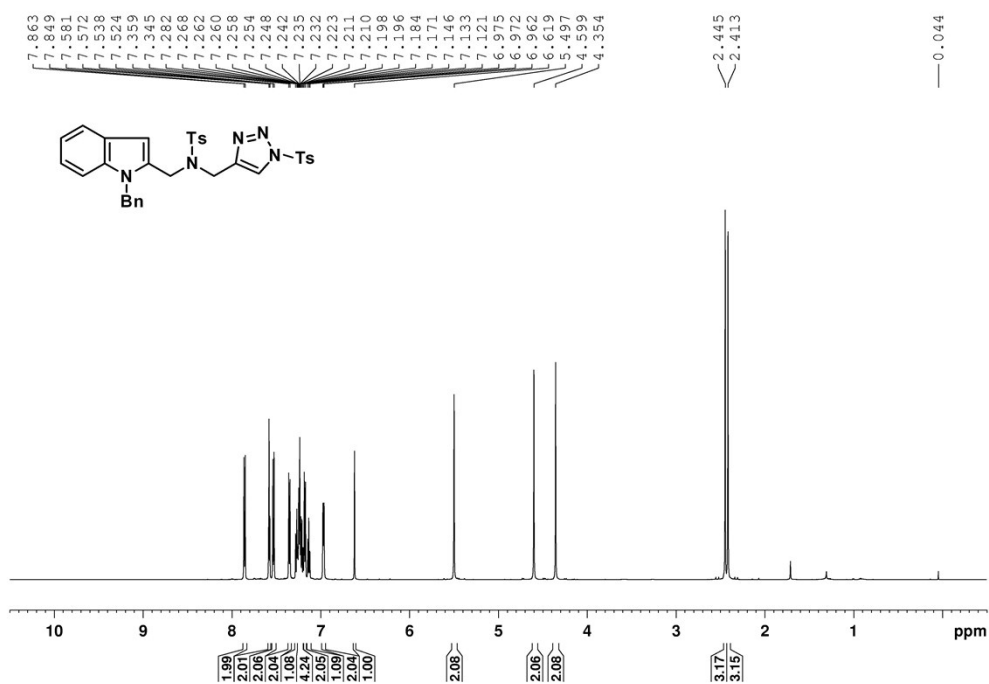

<sup>1</sup>H NMR Spectrum for **6s** (CDCl<sub>3</sub>, 600 MHz)

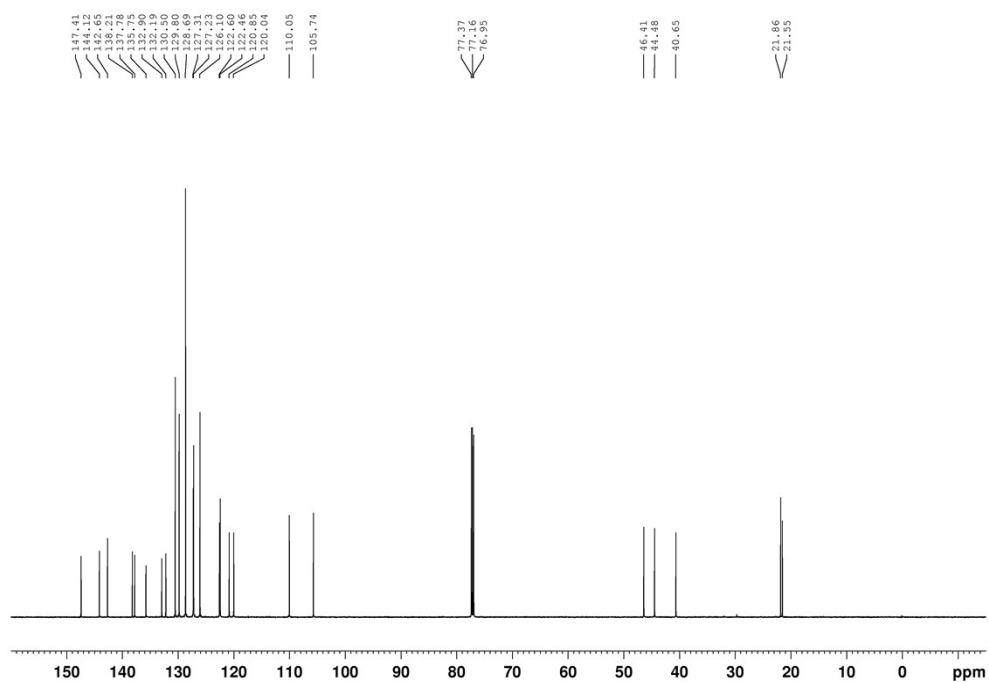

<sup>13</sup>C NMR Spectrum for **6s** (CDCl<sub>3</sub>, 150 MHz)

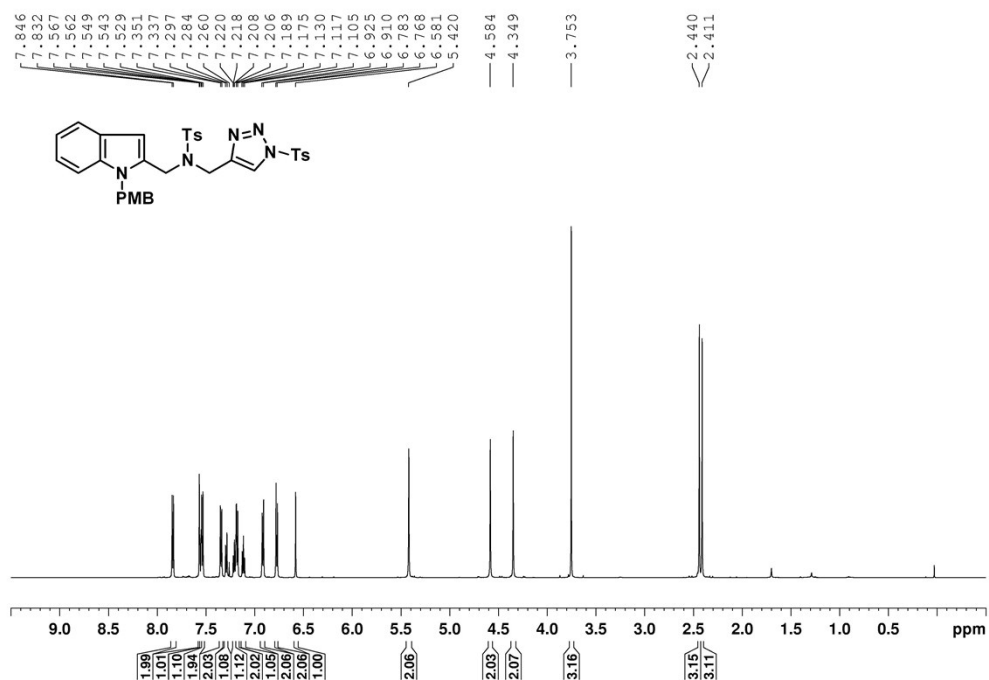

<sup>1</sup>H NMR Spectrum for **6t** (CDCl<sub>3</sub>, 600 MHz)

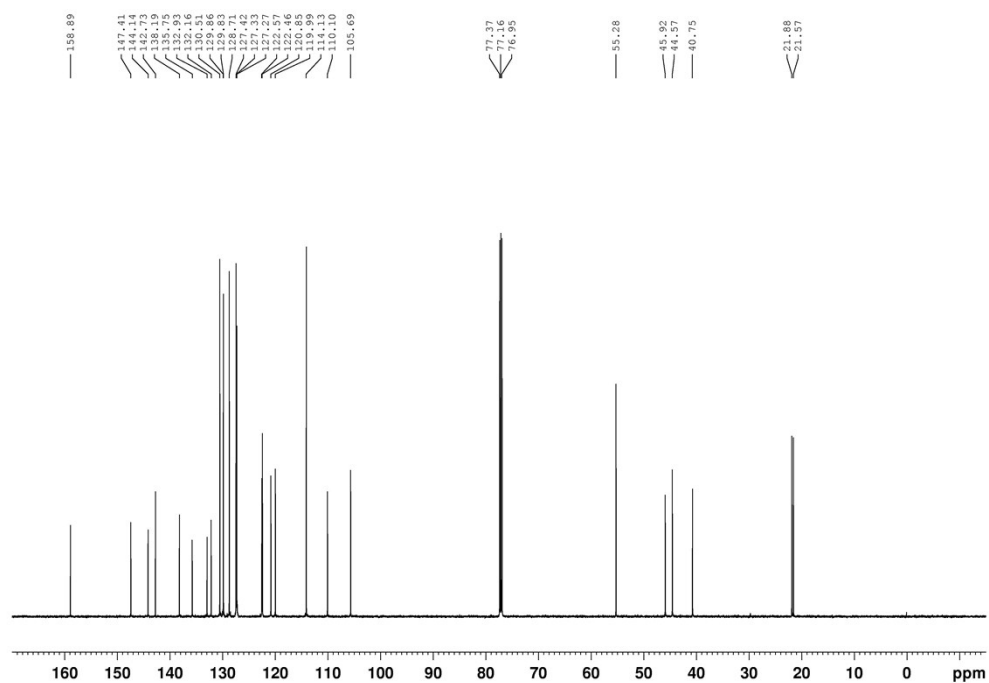

<sup>13</sup>C NMR Spectrum for **6t** (CDCl<sub>3</sub>, 150 MHz)

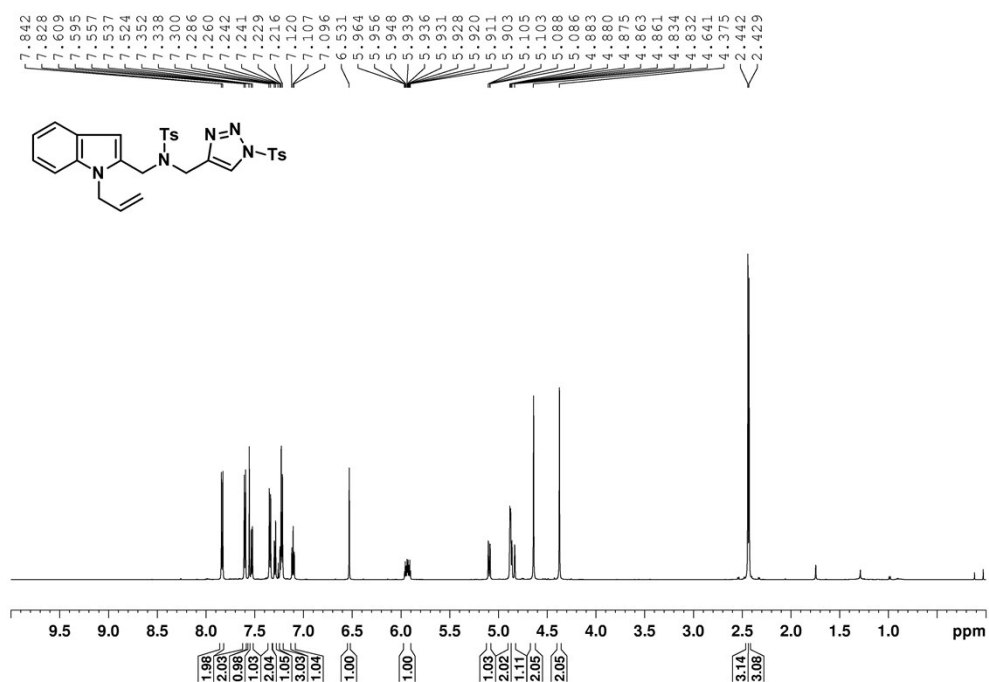

<sup>1</sup>H NMR Spectrum for **6u** (CDCl<sub>3</sub>, 600 MHz)

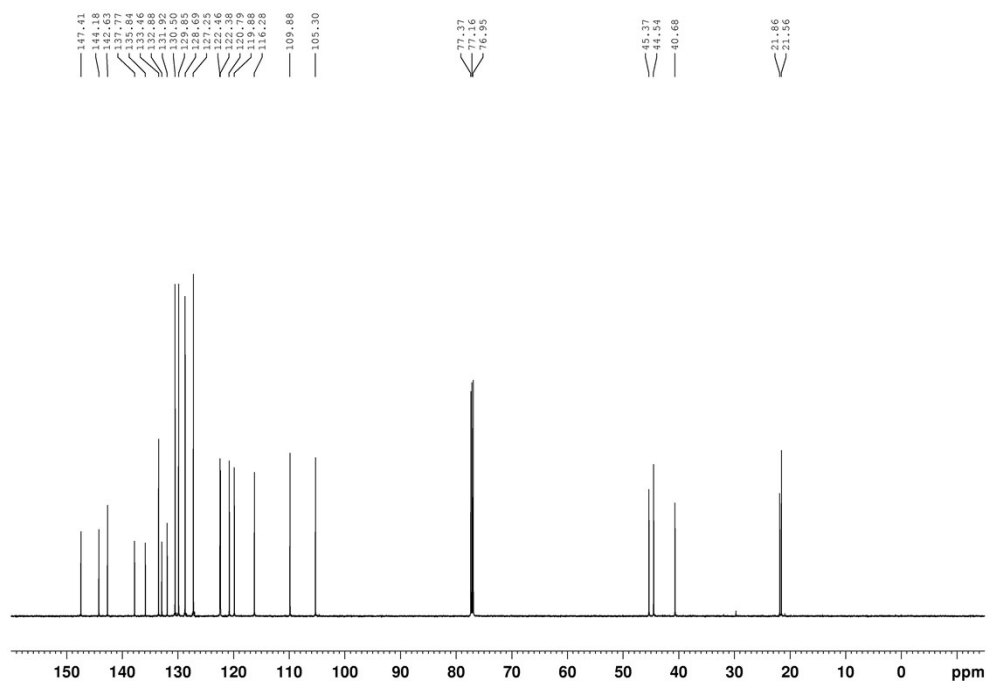

<sup>13</sup>C NMR Spectrum for **6u** (CDCl<sub>3</sub>, 150 MHz)

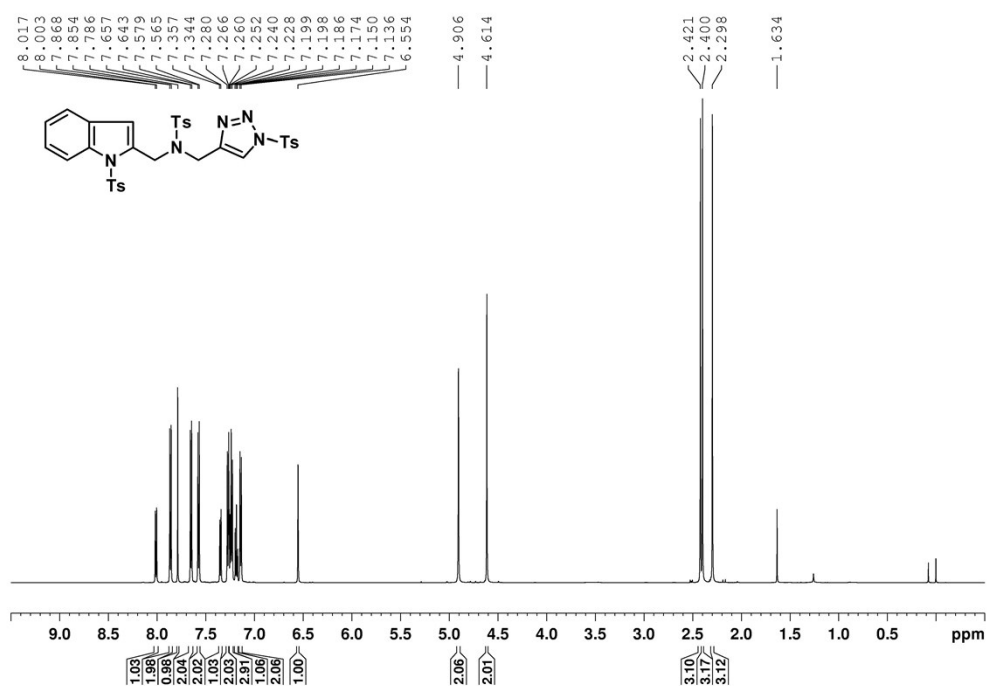

<sup>1</sup>H NMR Spectrum for 6v (CDCl<sub>3</sub>, 600 MHz)

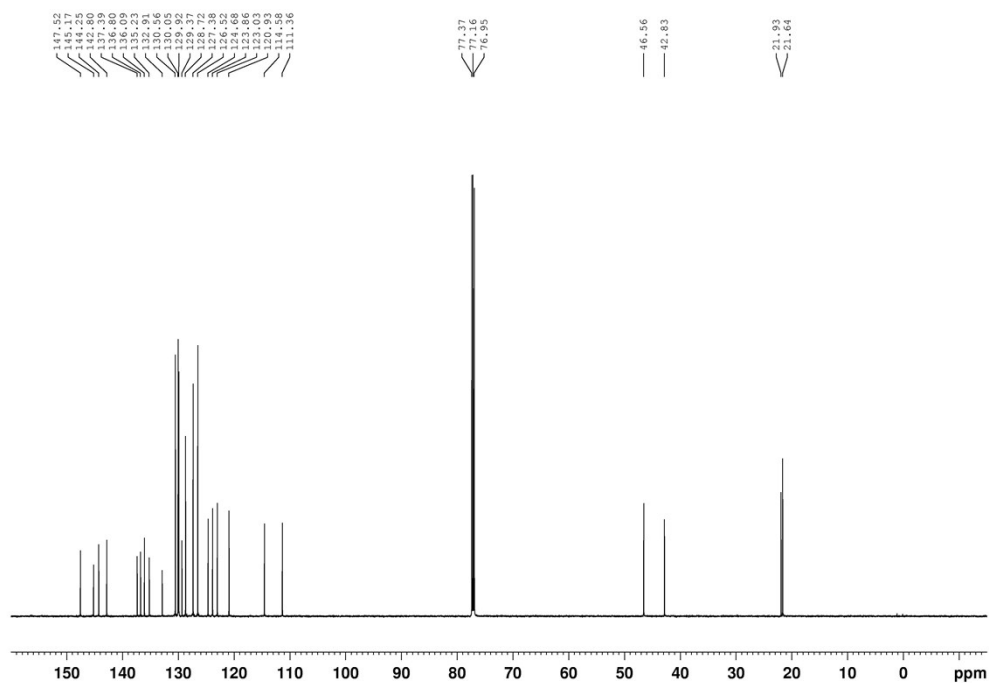

<sup>13</sup>C NMR Spectrum for 6v (CDCl<sub>3</sub>, 150 MHz)

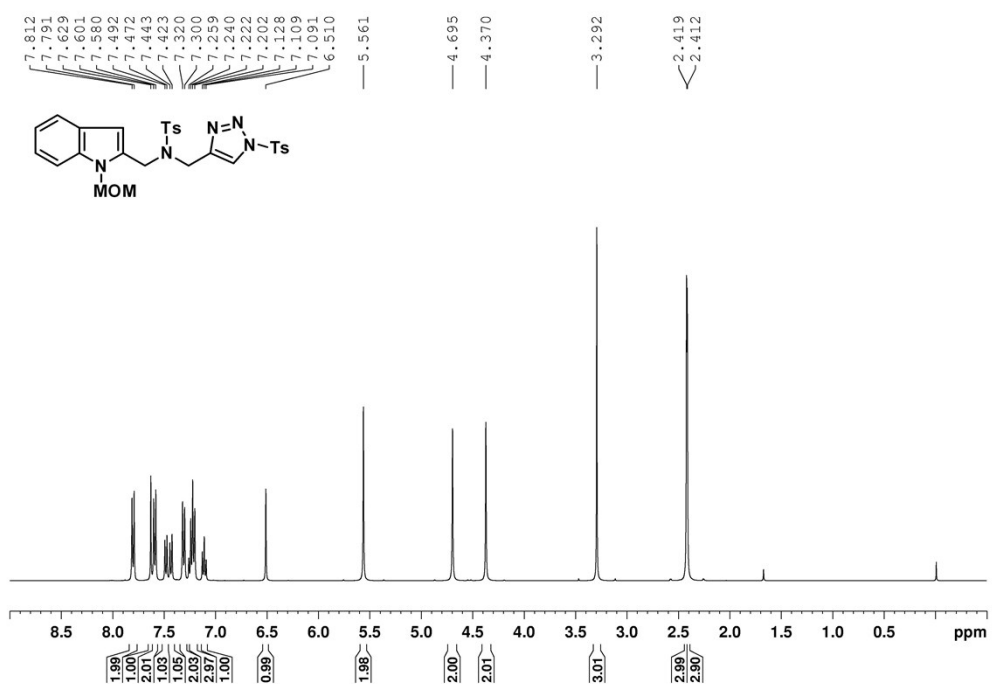

<sup>1</sup>H NMR Spectrum for **6w** (CDCl<sub>3</sub>, 600 MHz)

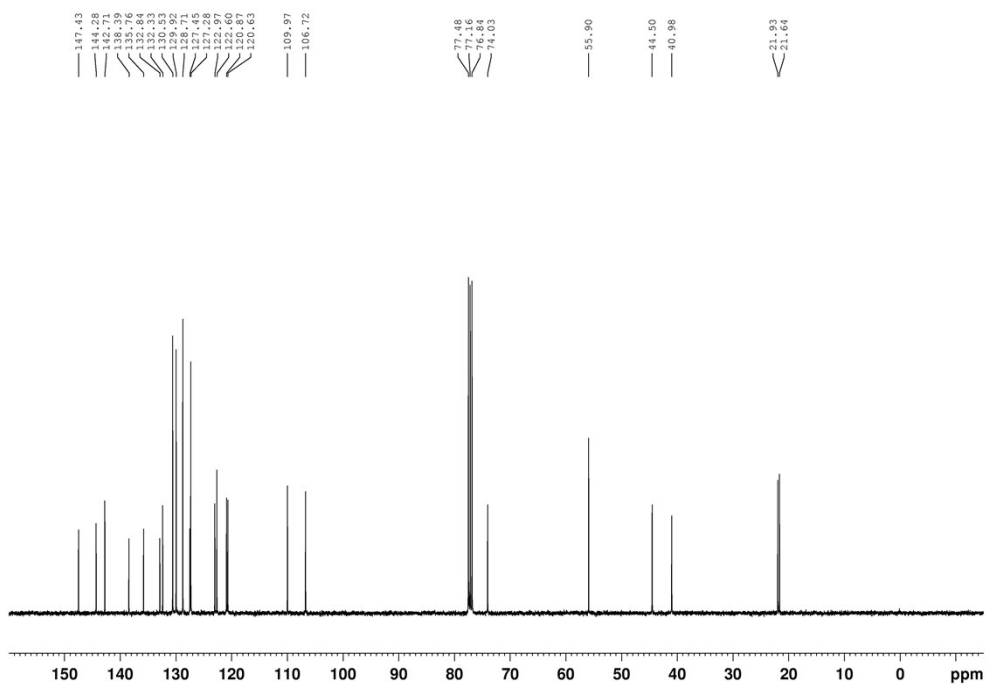

<sup>13</sup>C NMR Spectrum for **6w** (CDCl<sub>3</sub>, 150 MHz)

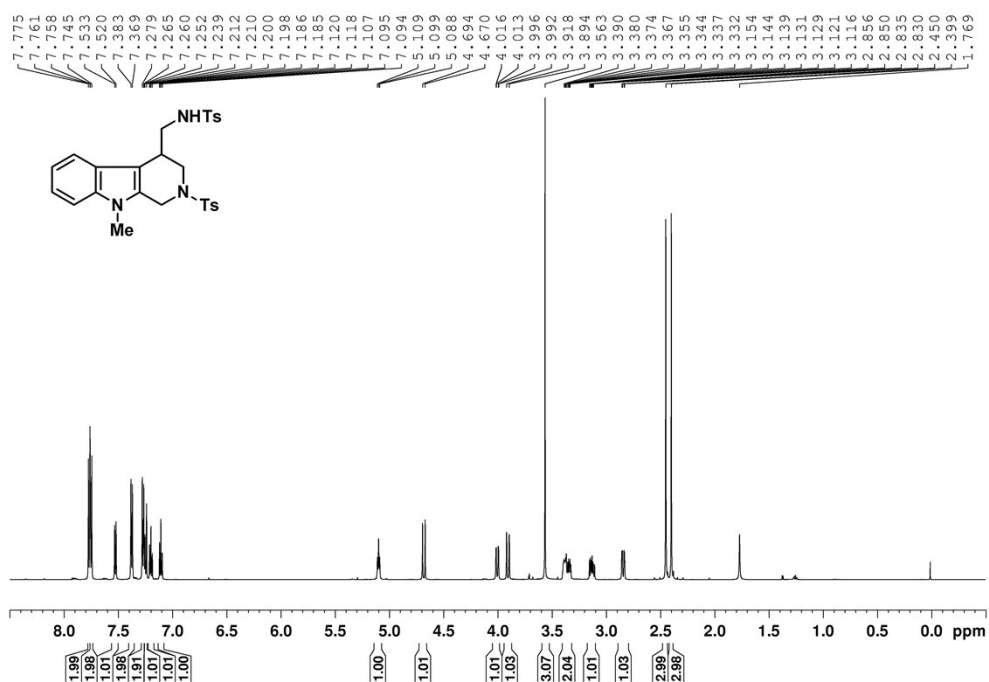

**<sup>1</sup>H NMR Spectrum for 11a (CDCl<sub>3</sub>, 600 MHz)**

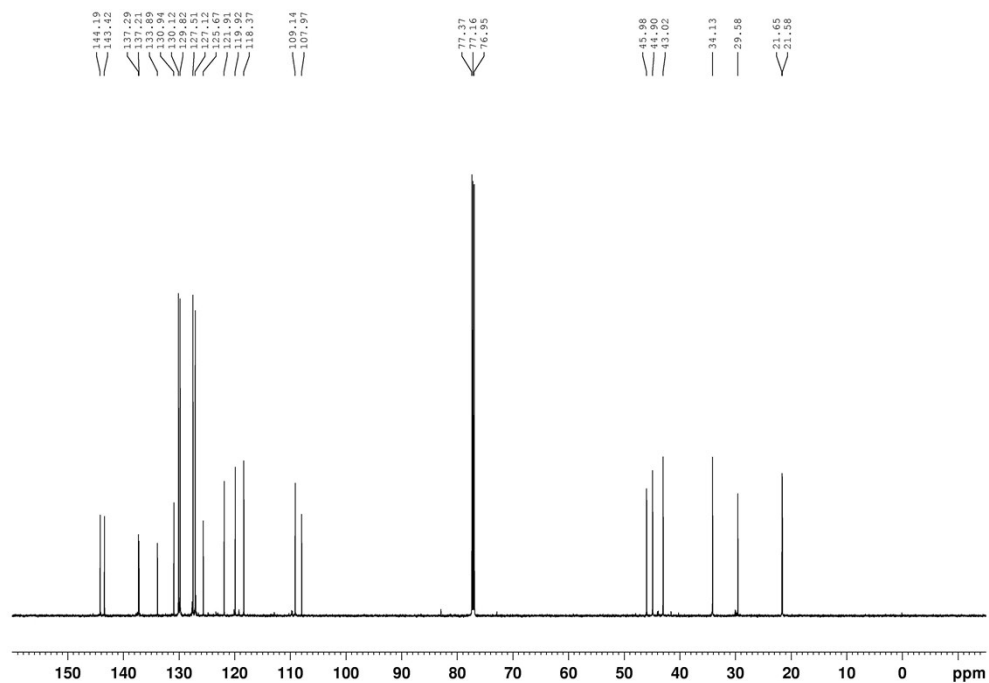

**<sup>13</sup>C NMR Spectrum for 11a (CDCl<sub>3</sub>, 150 MHz)**

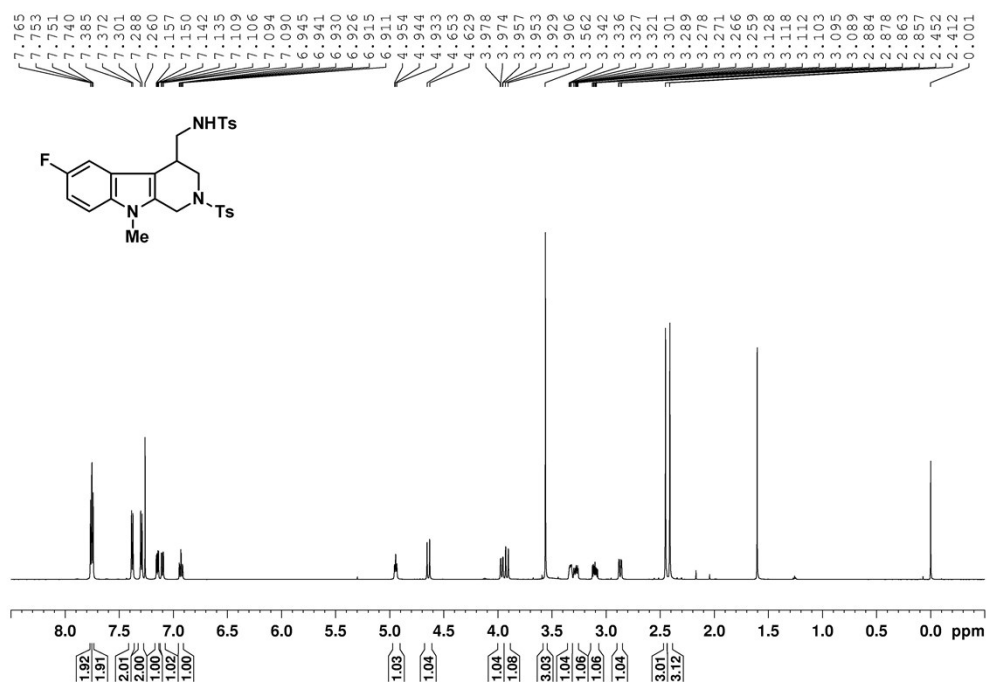

<sup>1</sup>H NMR Spectrum for **11b** (CDCl<sub>3</sub>, 600 MHz)

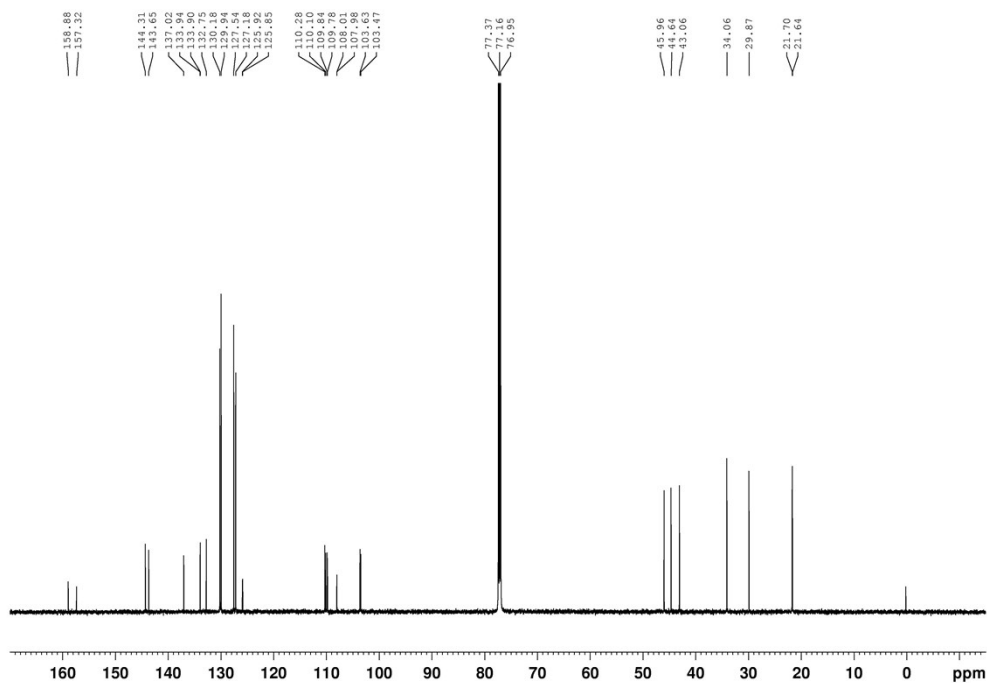

<sup>13</sup>C NMR Spectrum for **11b** (CDCl<sub>3</sub>, 150 MHz)

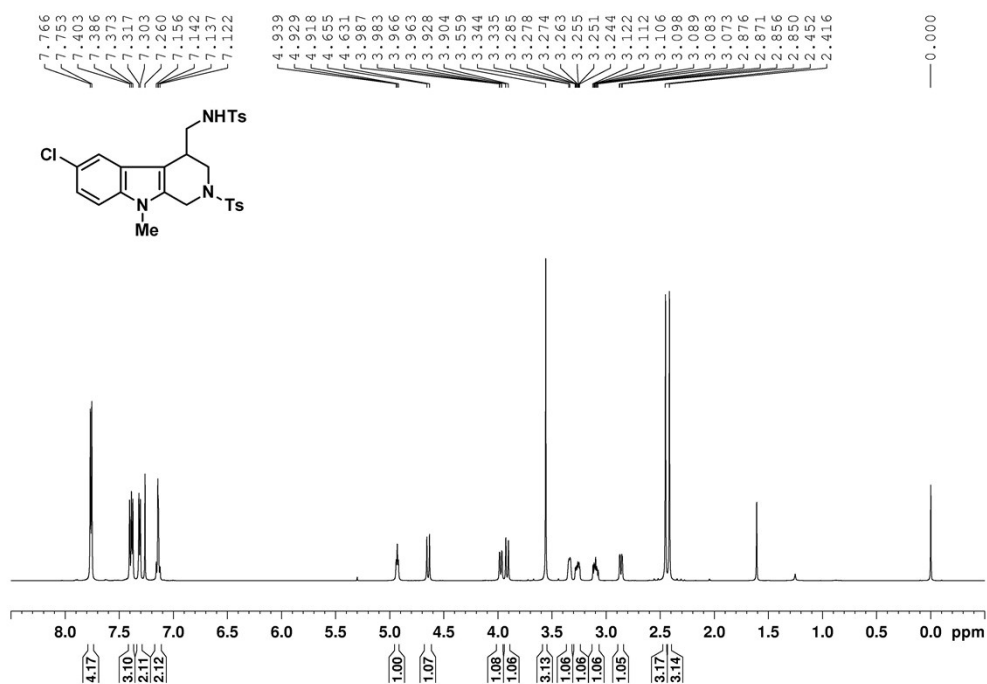

<sup>1</sup>H NMR Spectrum for **11c** (CDCl<sub>3</sub>, 600 MHz)

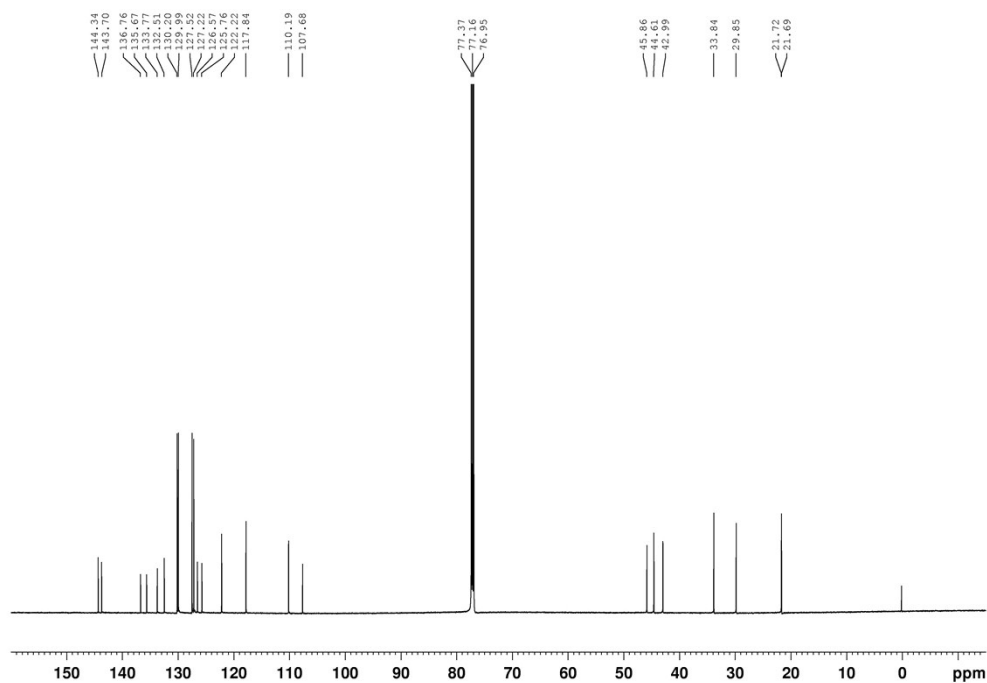

<sup>13</sup>C NMR Spectrum for **11c** (CDCl<sub>3</sub>, 150 MHz)



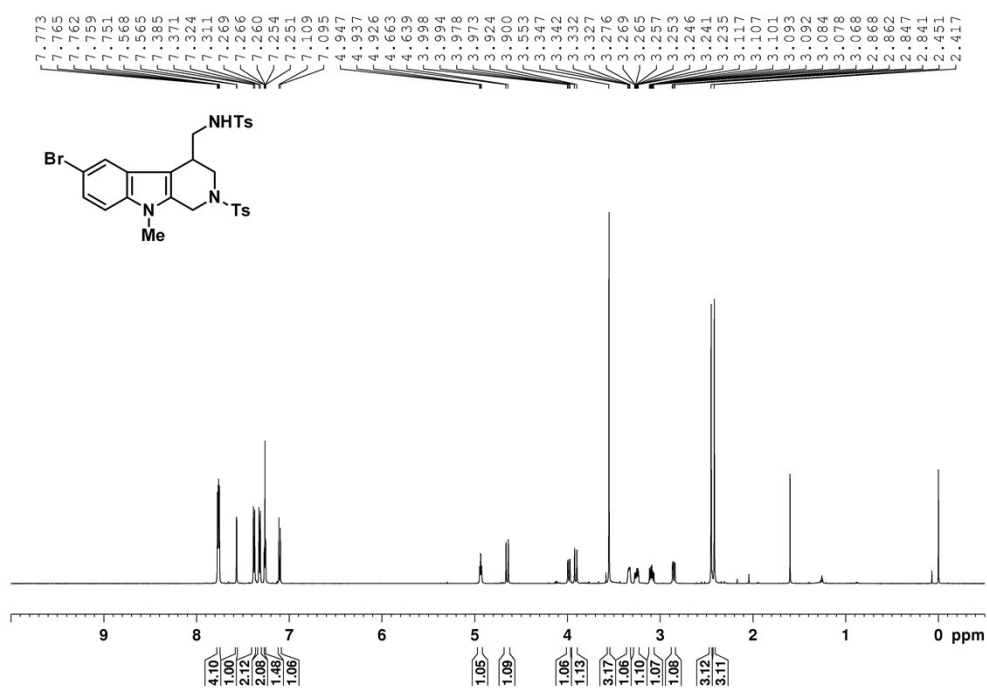

<sup>1</sup>H NMR Spectrum for **11d** (CDCl<sub>3</sub>, 600 MHz)

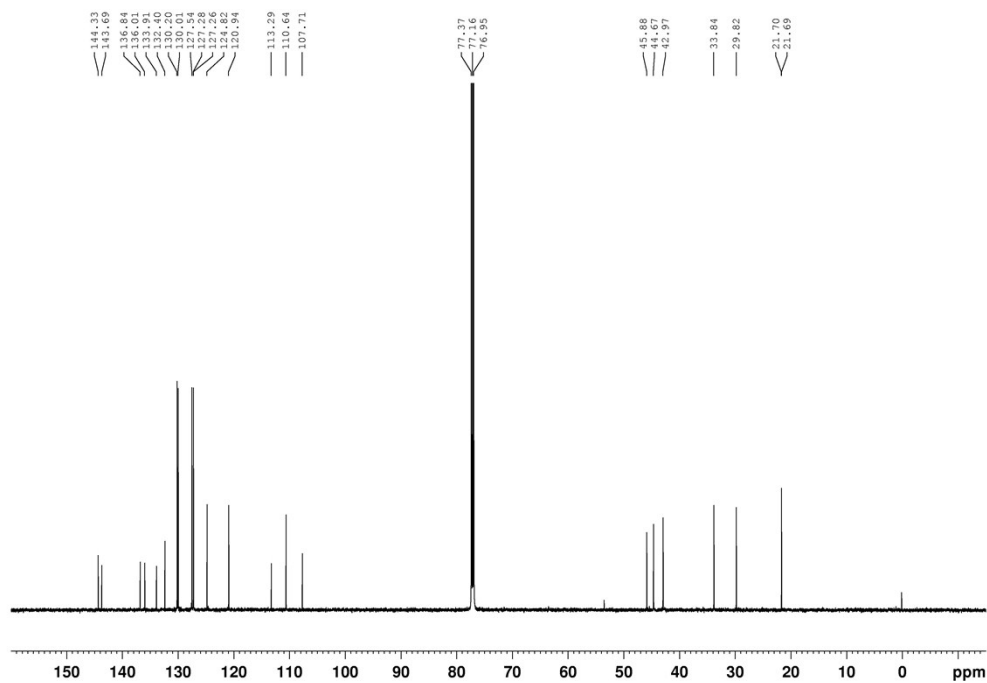

<sup>13</sup>C NMR Spectrum for **11d** (CDCl<sub>3</sub>, 150 MHz)

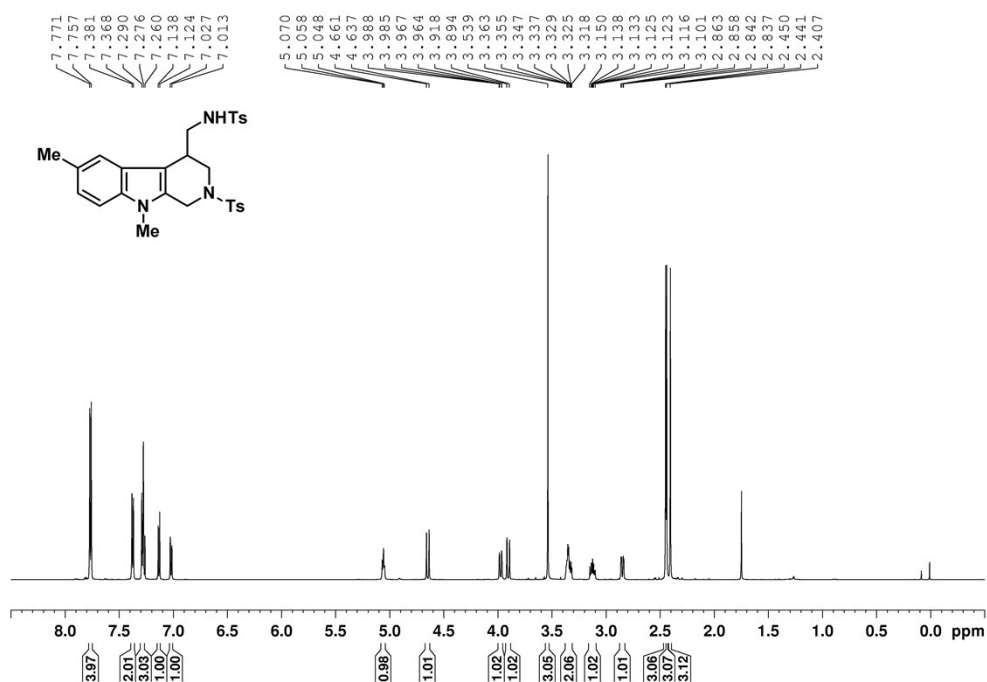

<sup>1</sup>H NMR Spectrum for **11e** (CDCl<sub>3</sub>, 600 MHz)

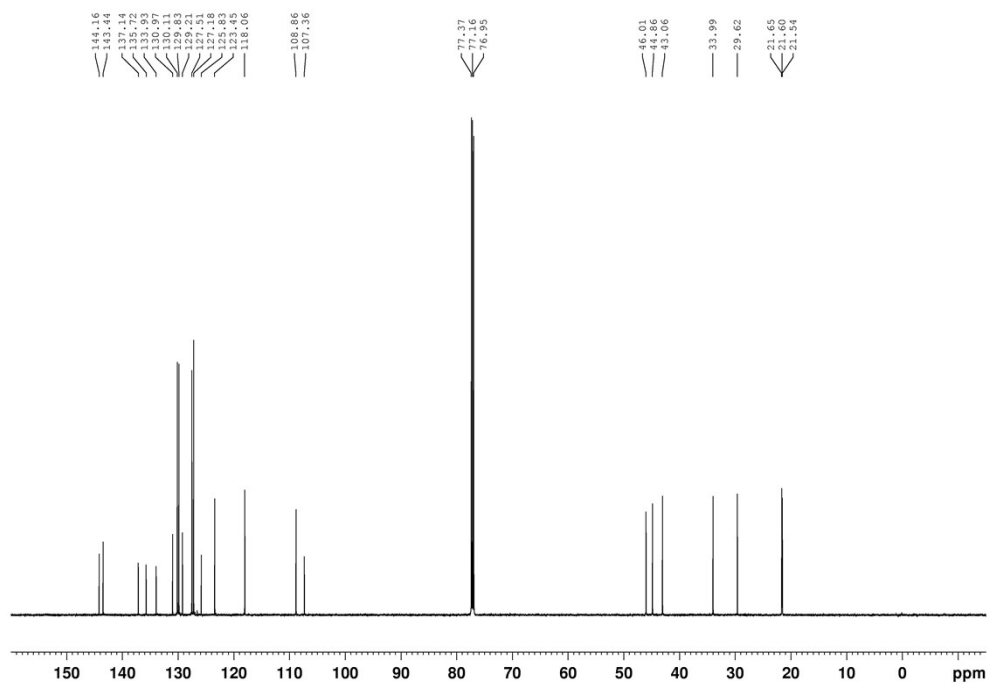

<sup>13</sup>C NMR Spectrum for **11e** (CDCl<sub>3</sub>, 150 MHz)

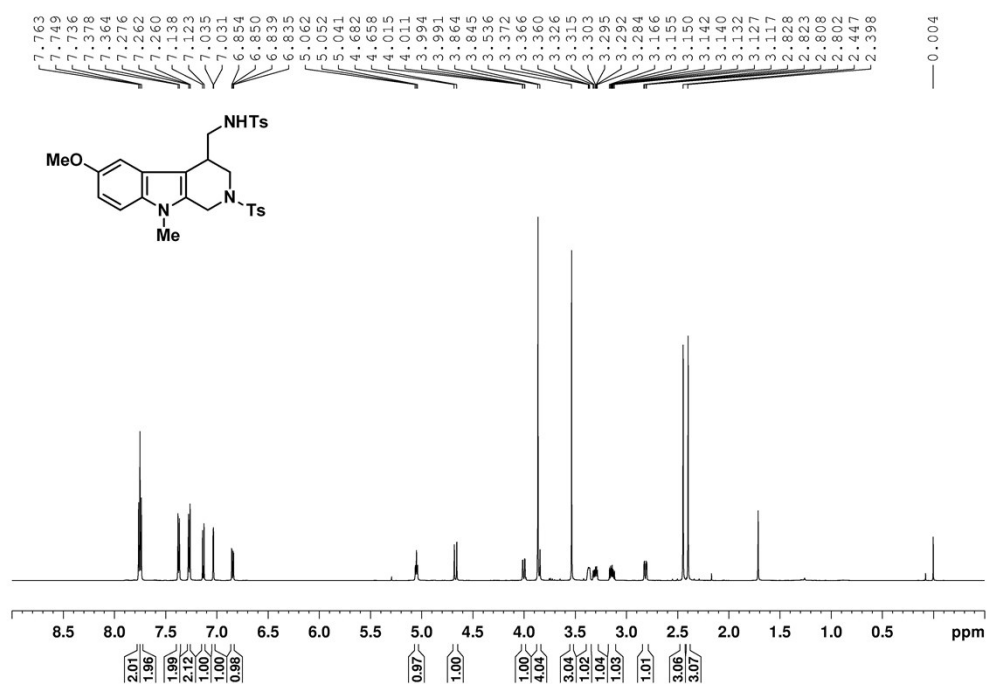

<sup>1</sup>H NMR Spectrum for **11f** (CDCl<sub>3</sub>, 600 MHz)

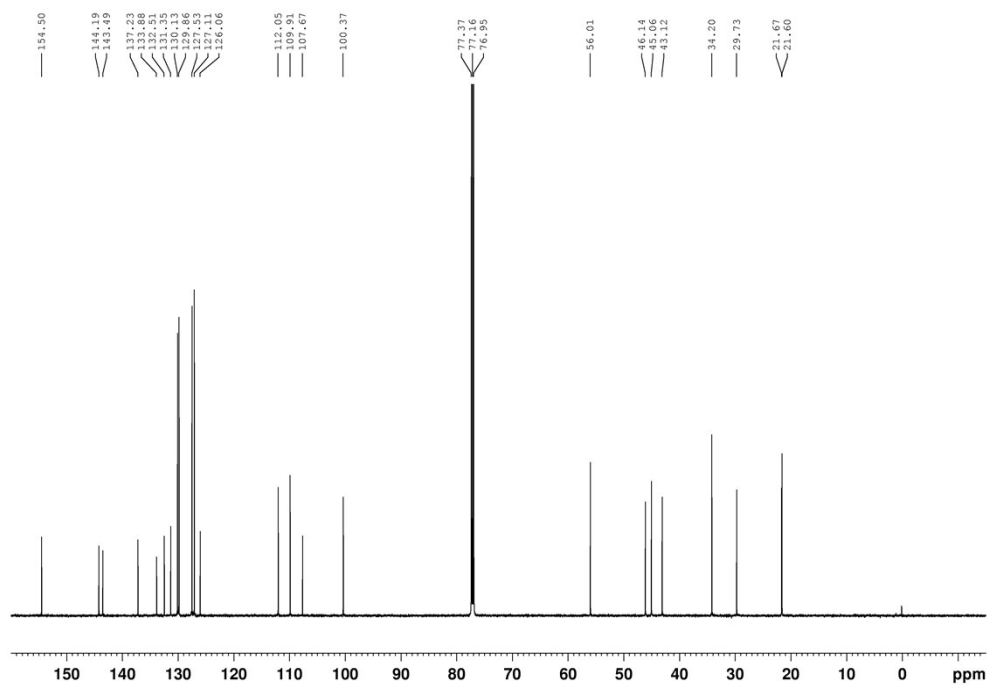

<sup>13</sup>C NMR Spectrum for **11f** (CDCl<sub>3</sub>, 150 MHz)

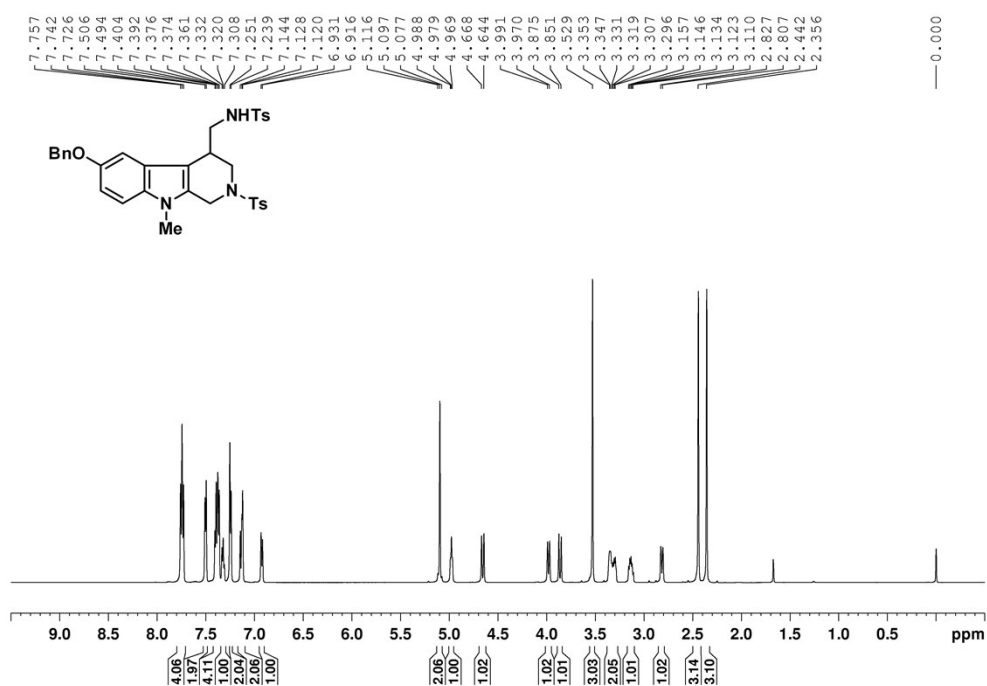

<sup>1</sup>H NMR Spectrum for **11g** (CDCl<sub>3</sub>, 600 MHz)

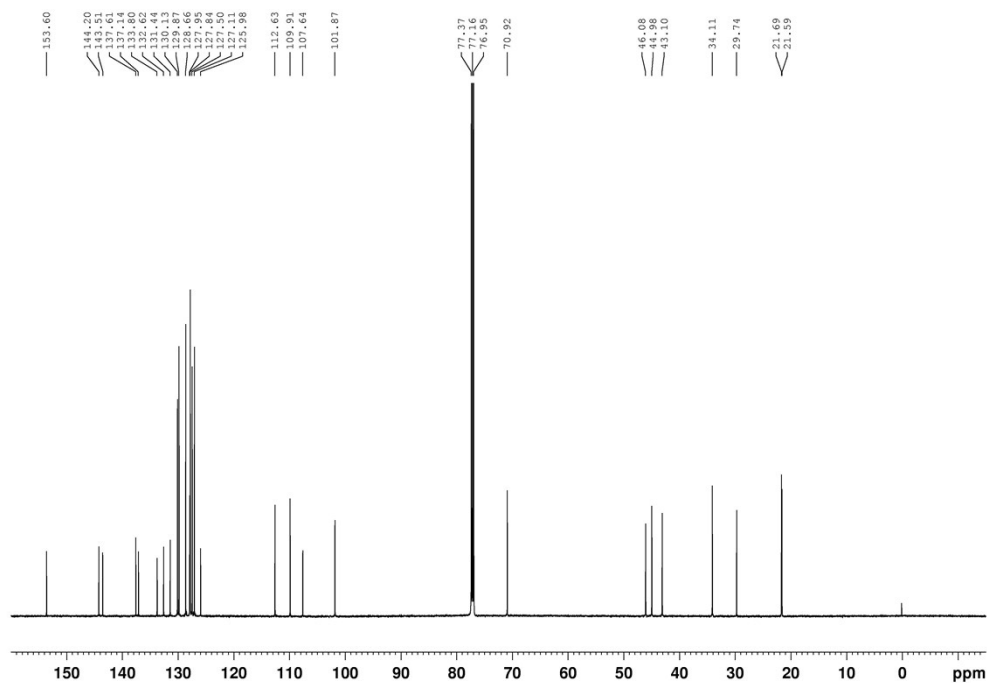

<sup>13</sup>C NMR Spectrum for **11g** (CDCl<sub>3</sub>, 150 MHz)

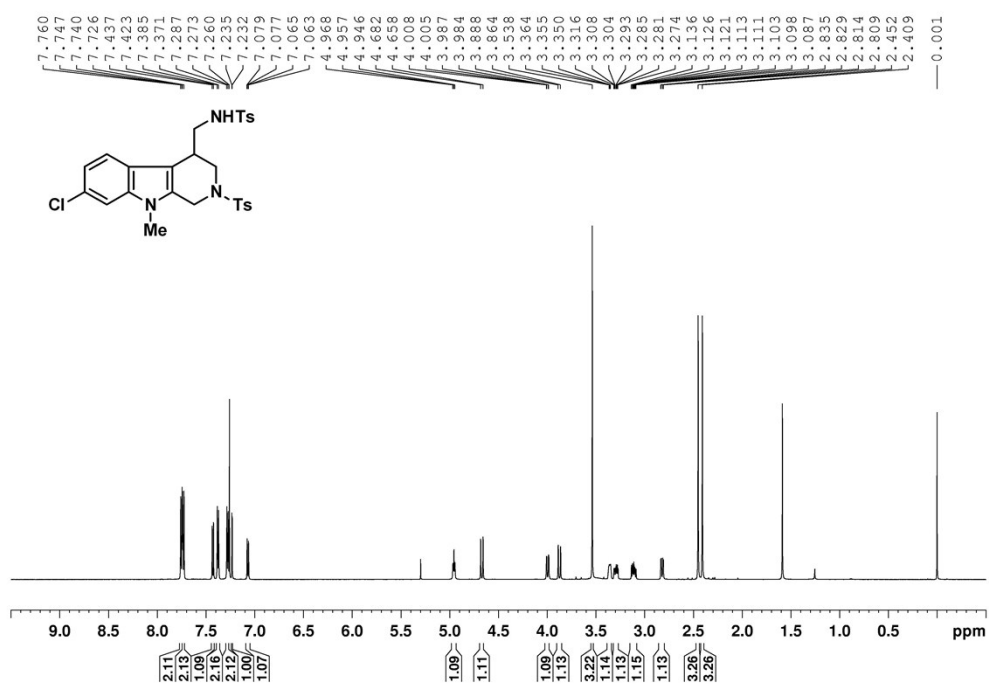

<sup>1</sup>H NMR Spectrum for **11h** (CDCl<sub>3</sub>, 600 MHz)

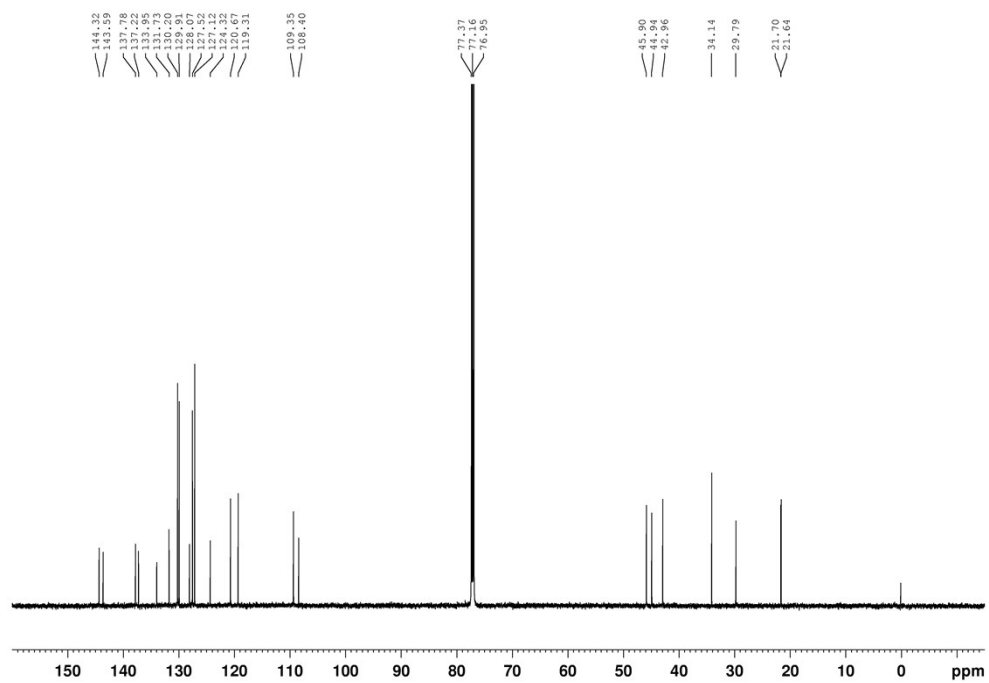

<sup>13</sup>C NMR Spectrum for **11h** (CDCl<sub>3</sub>, 150 MHz)

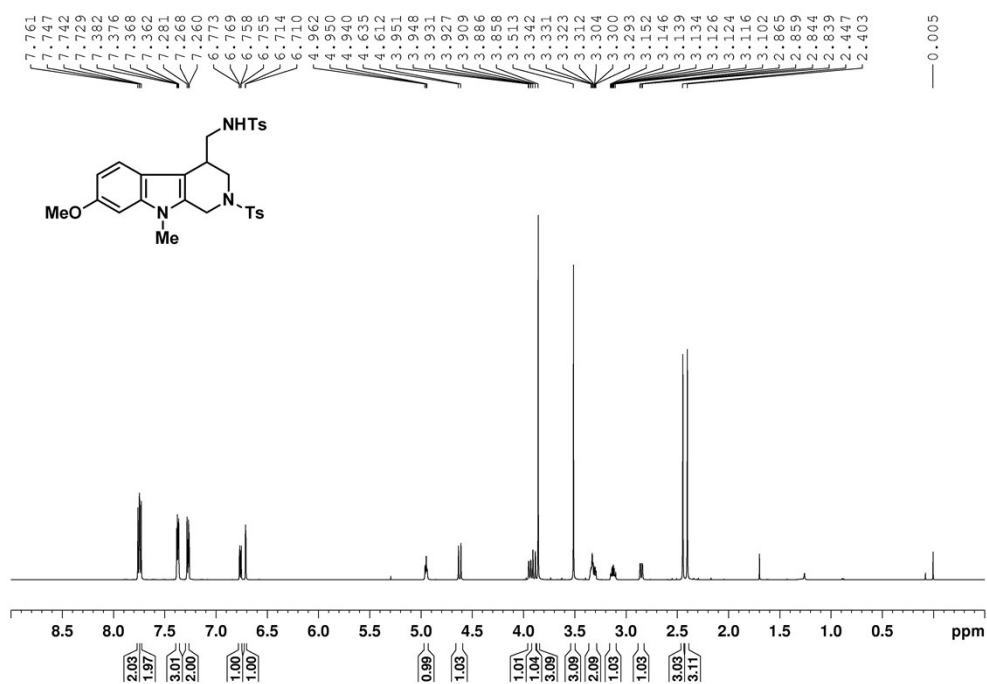

<sup>1</sup>H NMR Spectrum for **11i** (CDCl<sub>3</sub>, 600 MHz)

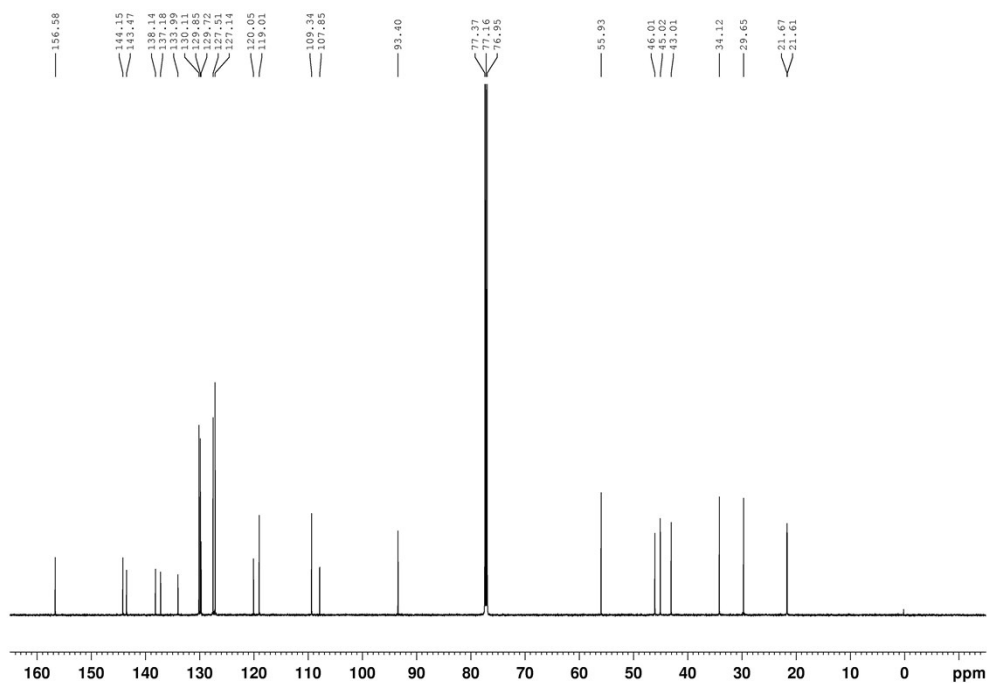

<sup>13</sup>C NMR Spectrum for **11i** (CDCl<sub>3</sub>, 150 MHz)

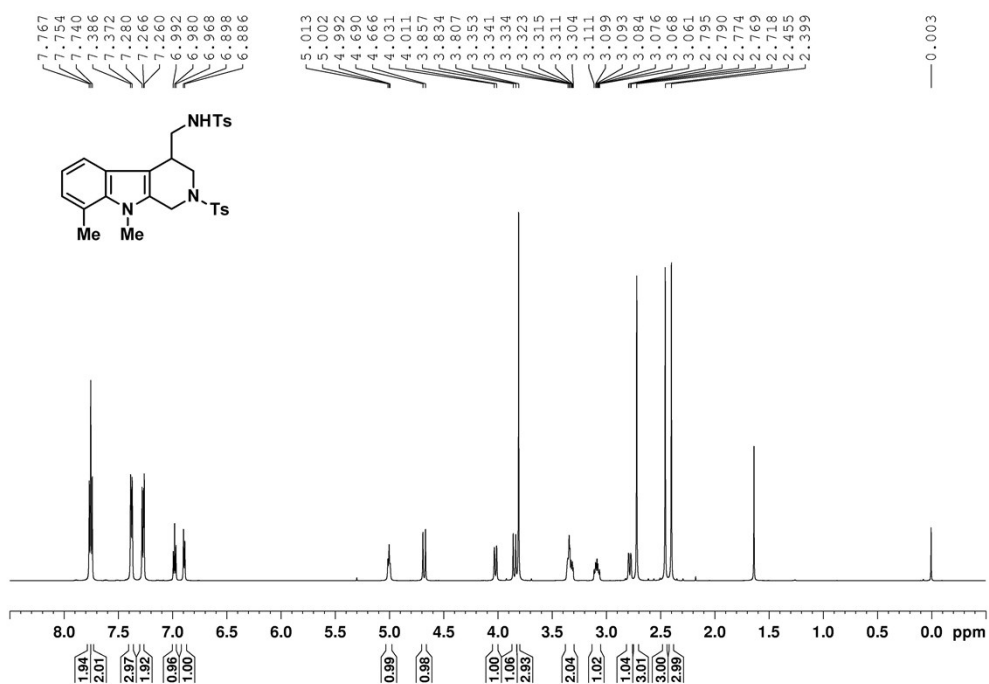

<sup>1</sup>H NMR Spectrum for **11j** (CDCl<sub>3</sub>, 600 MHz)

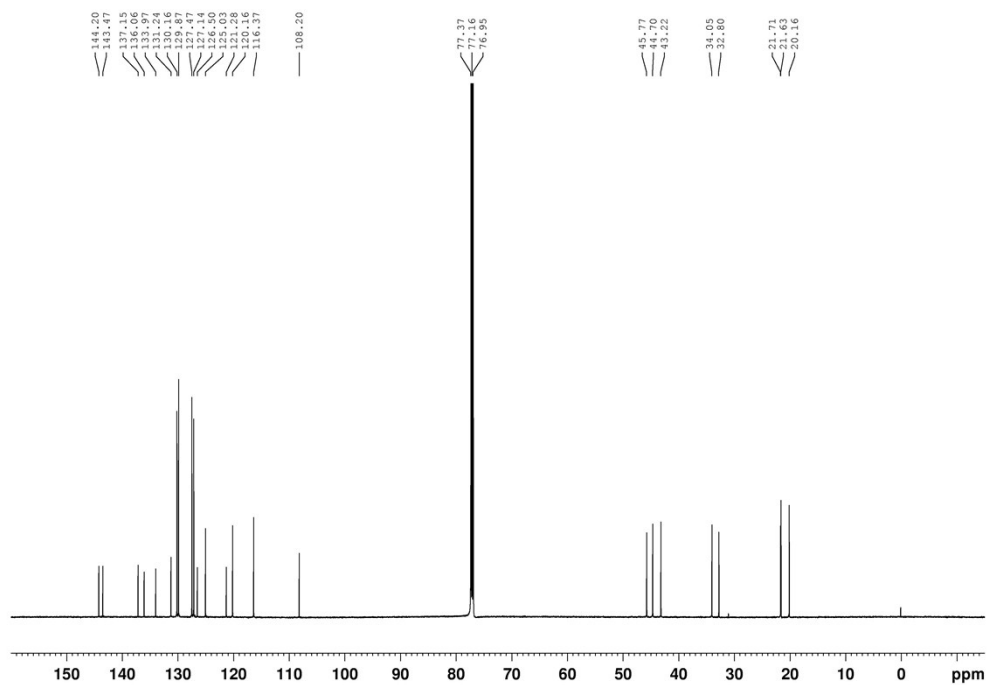

<sup>13</sup>C NMR Spectrum for **11j** (CDCl<sub>3</sub>, 150 MHz)

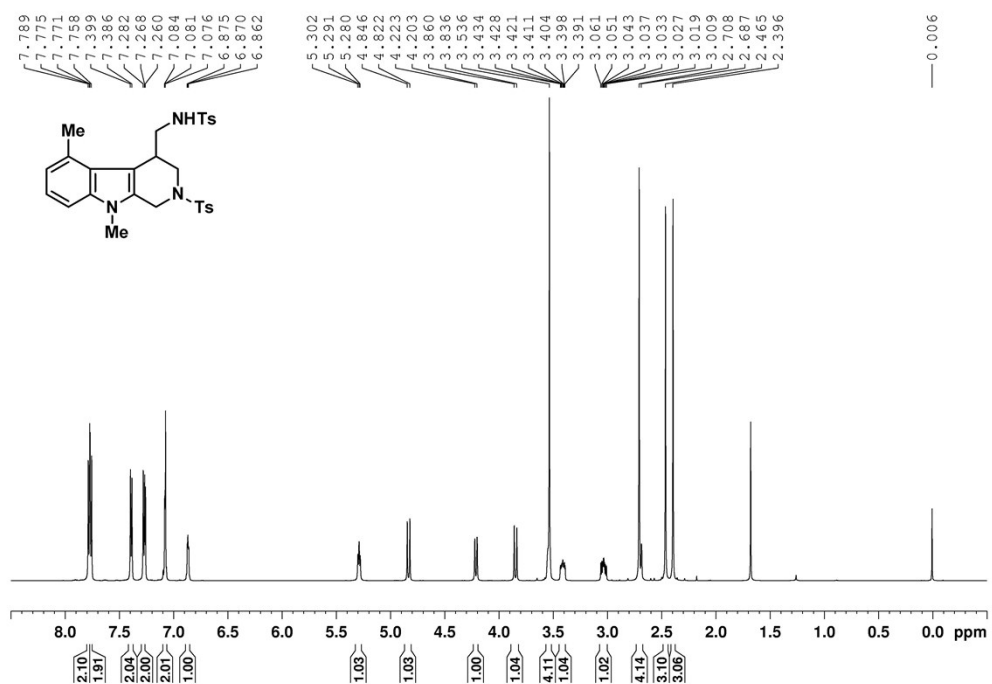

<sup>1</sup>H NMR Spectrum for **11k** (CDCl<sub>3</sub>, 600 MHz)

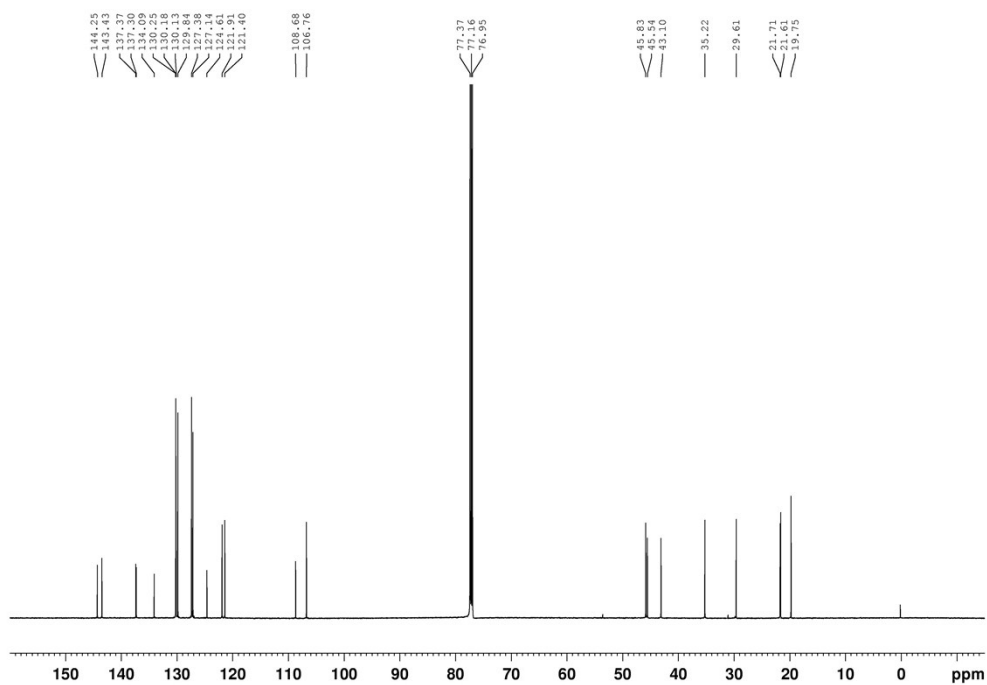

<sup>13</sup>C NMR Spectrum for **11k** (CDCl<sub>3</sub>, 150 MHz)



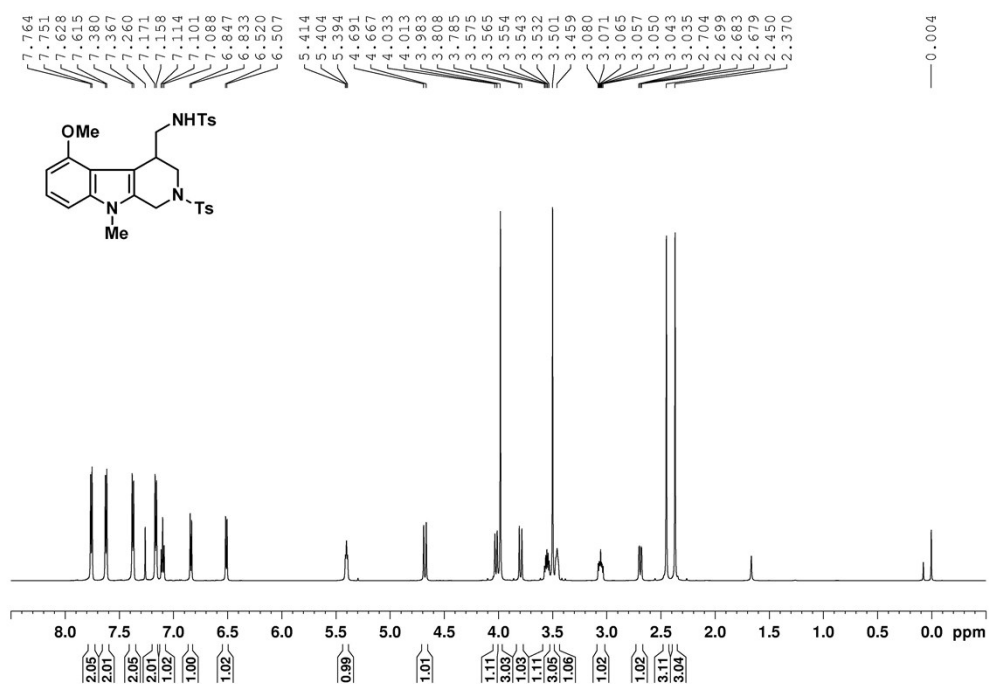

<sup>1</sup>H NMR Spectrum for **111** (CDCl<sub>3</sub>, 600 MHz)

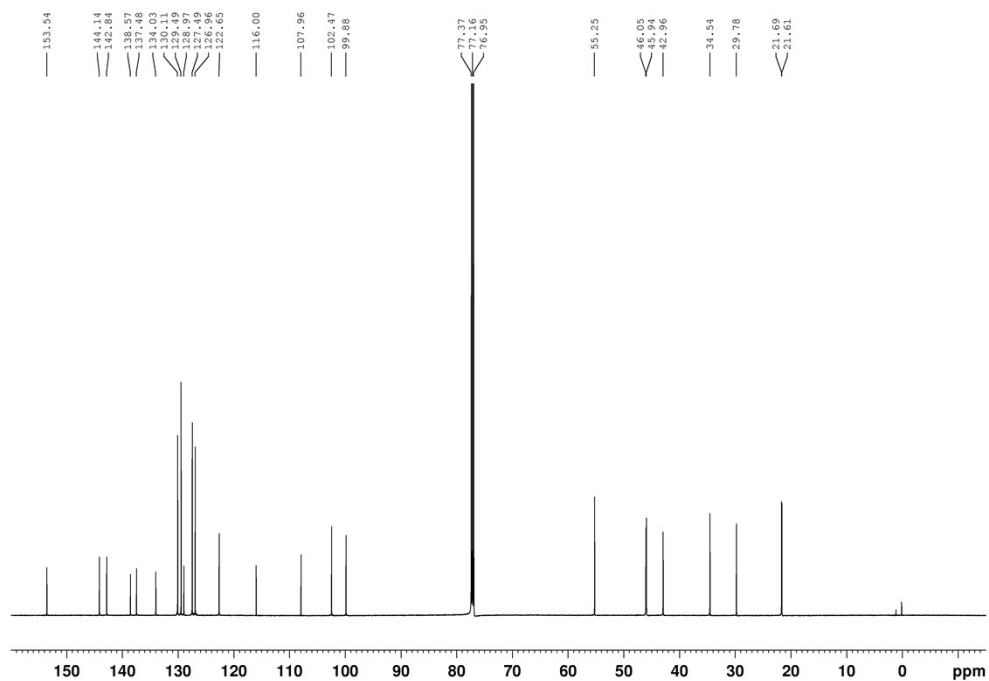

<sup>13</sup>C NMR Spectrum for **111** (CDCl<sub>3</sub>, 150 MHz)

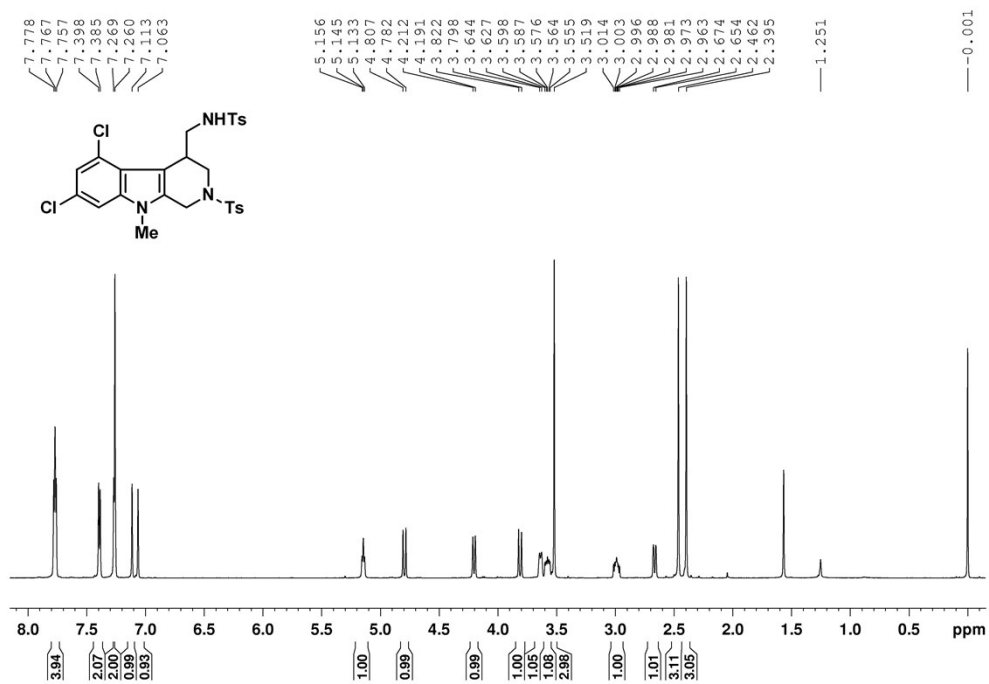

<sup>1</sup>H NMR Spectrum for **11m** (CDCl<sub>3</sub>, 600 MHz)

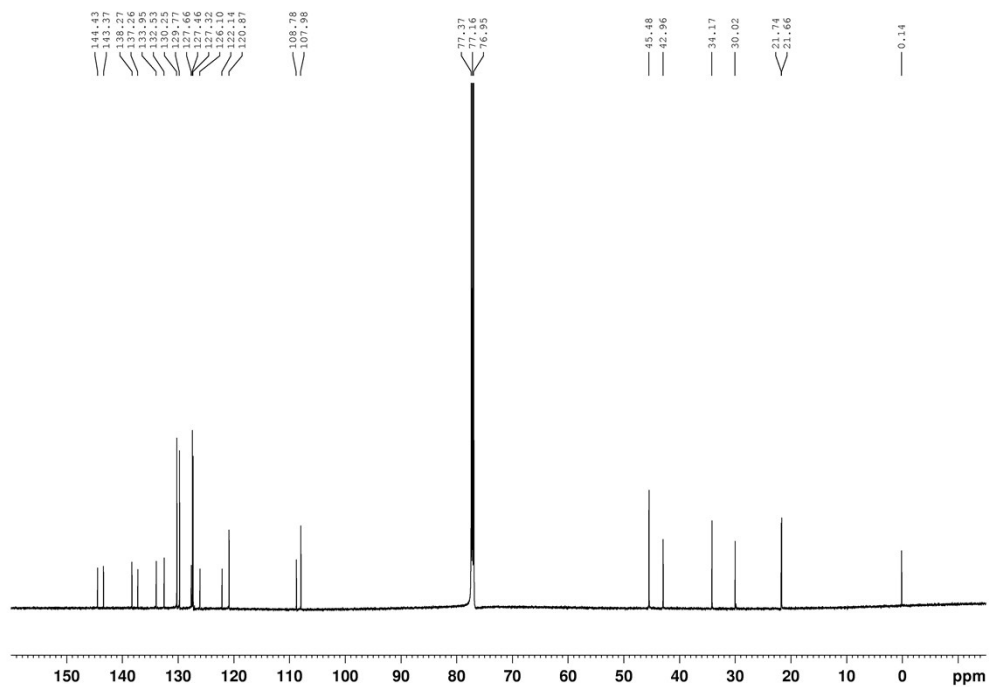

<sup>13</sup>C NMR Spectrum for **11m** (CDCl<sub>3</sub>, 150 MHz)

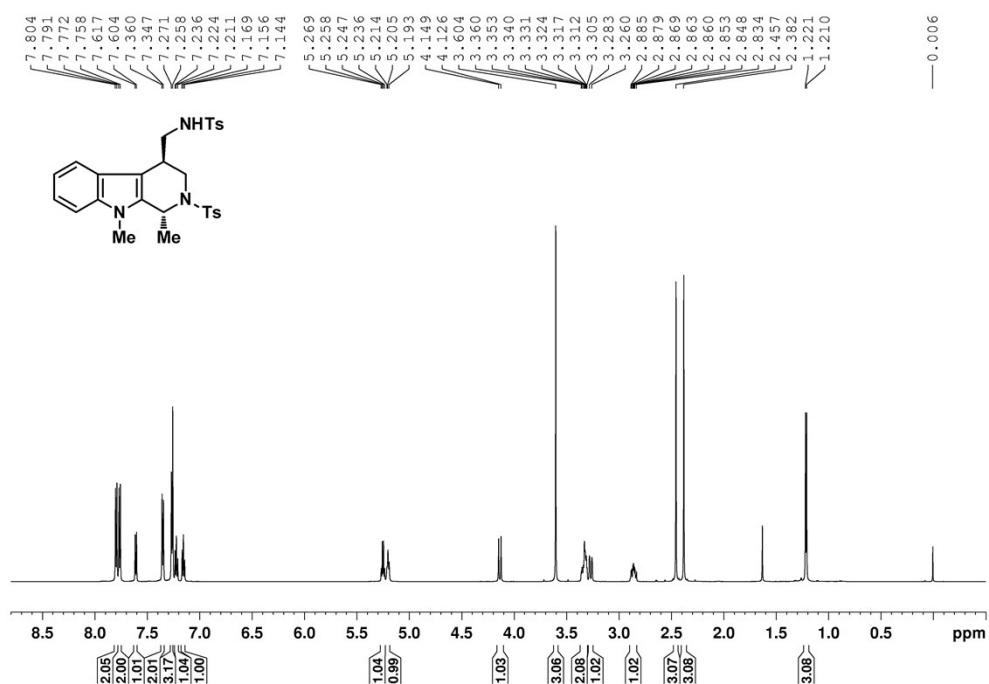

**<sup>1</sup>H NMR Spectrum for **11n** (CDCl<sub>3</sub>, 600 MHz)**

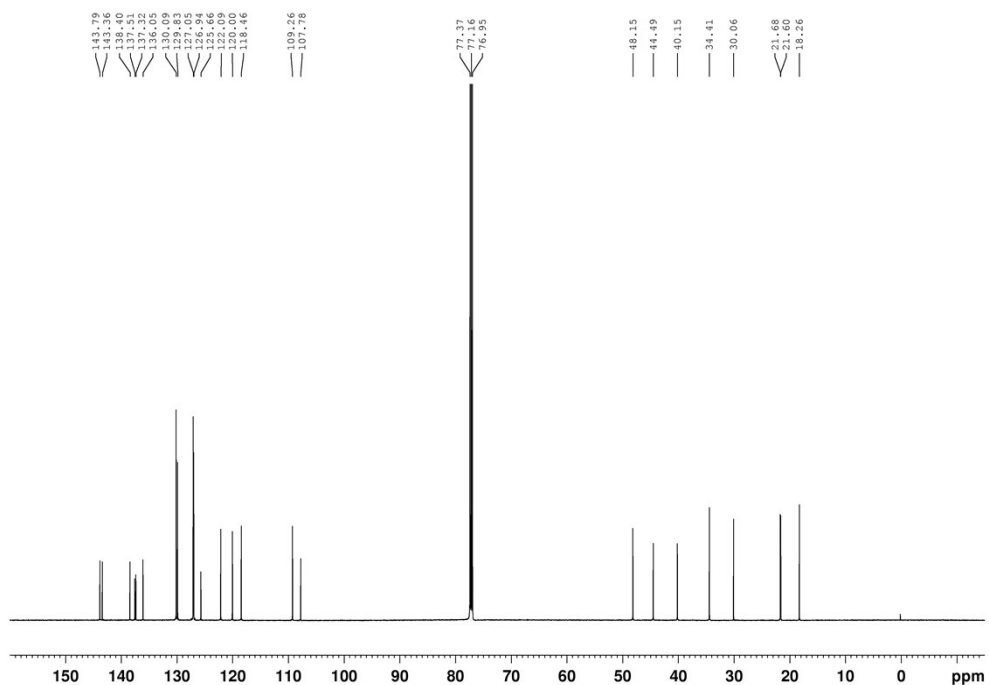

**<sup>13</sup>C NMR Spectrum for **11n** (CDCl<sub>3</sub>, 150 MHz)**

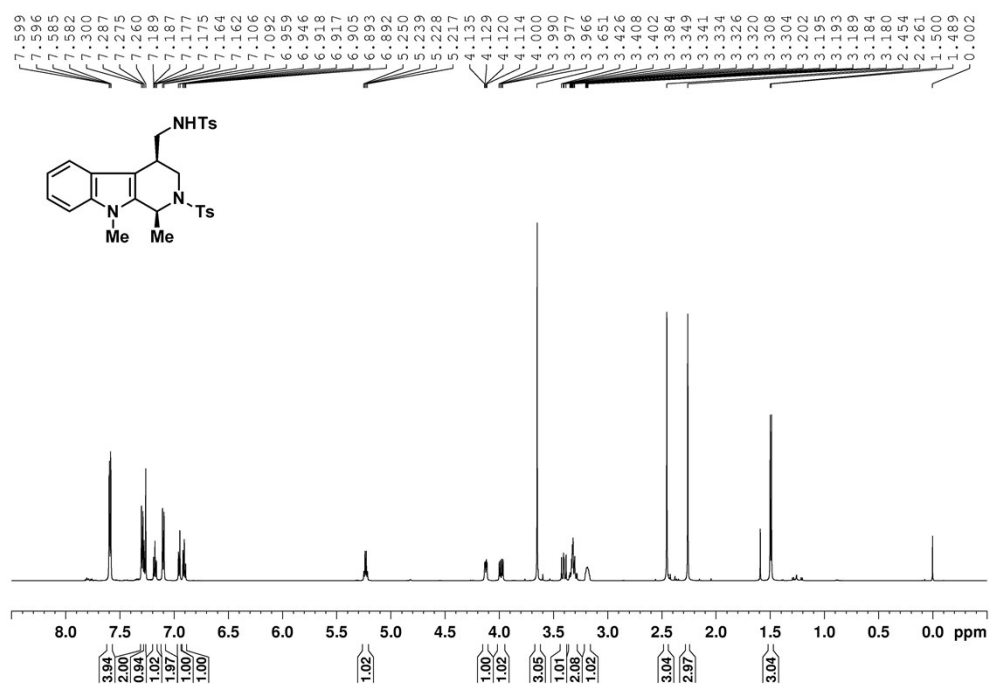

<sup>1</sup>H NMR Spectrum for **11n'** (CDCl<sub>3</sub>, 600 MHz)

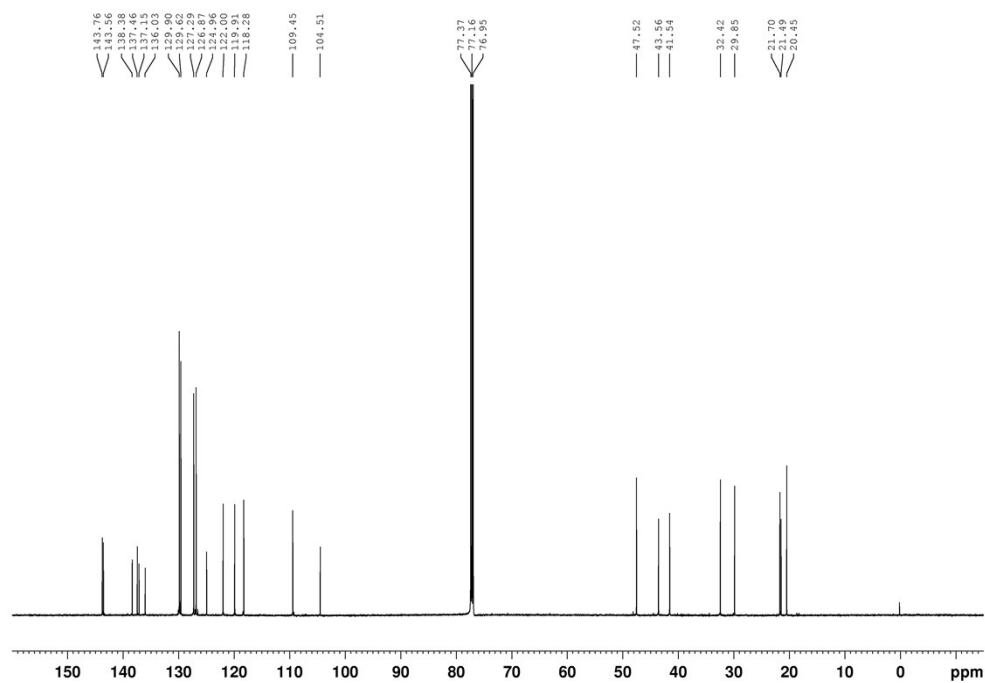

<sup>13</sup>C NMR Spectrum for **11n'** (CDCl<sub>3</sub>, 150 MHz)

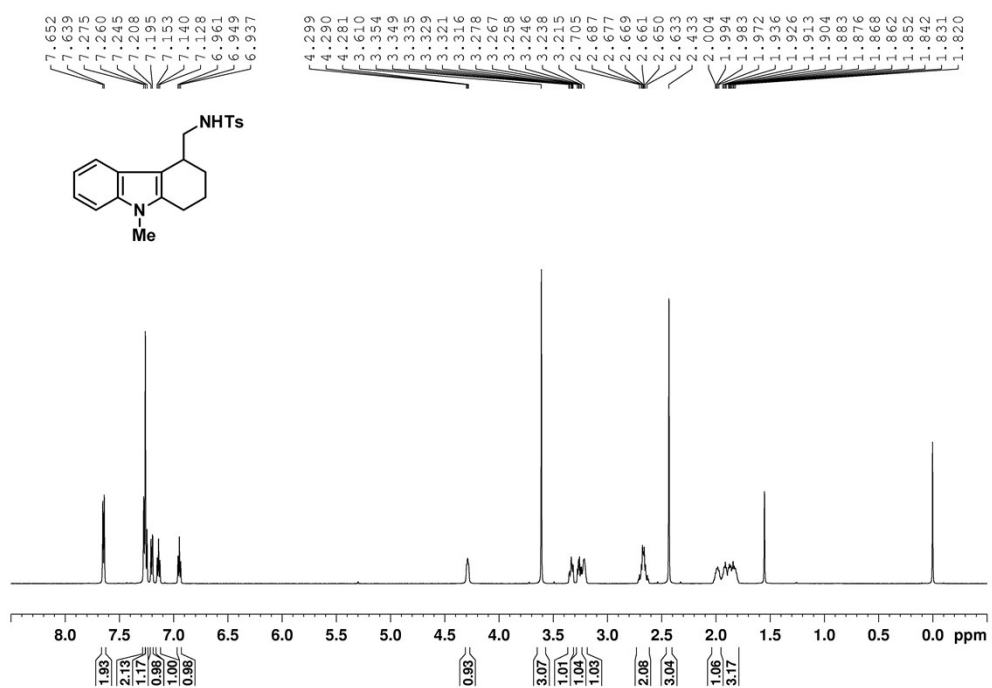

<sup>1</sup>H NMR Spectrum for **11o** (CDCl<sub>3</sub>, 600 MHz)

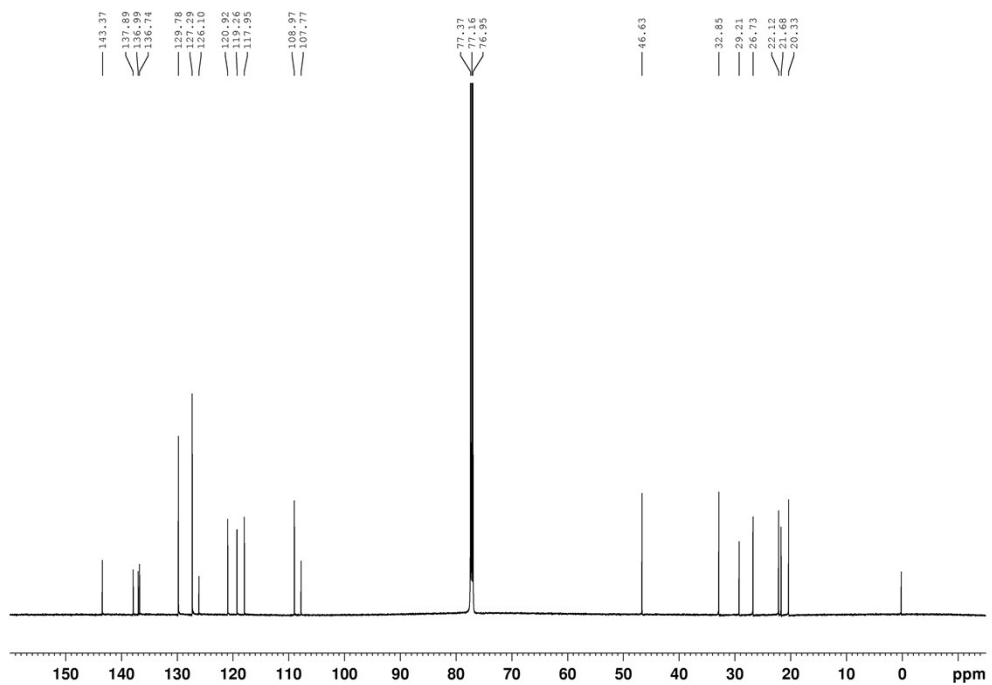

<sup>13</sup>C NMR Spectrum for **11o** (CDCl<sub>3</sub>, 150 MHz)

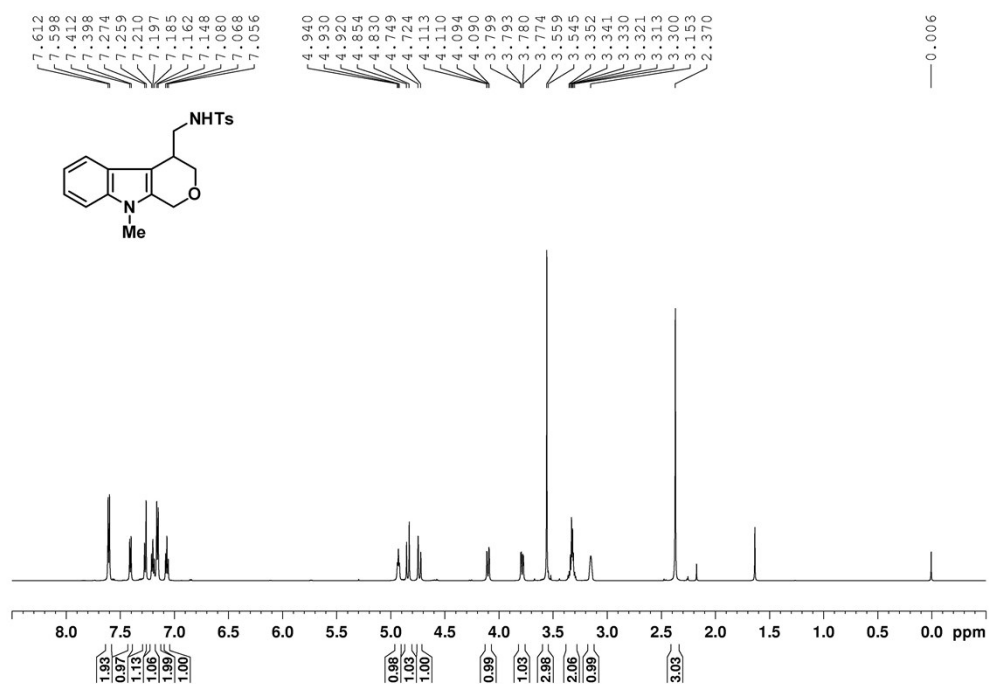

<sup>1</sup>H NMR Spectrum for **11p** (CDCl<sub>3</sub>, 600 MHz)

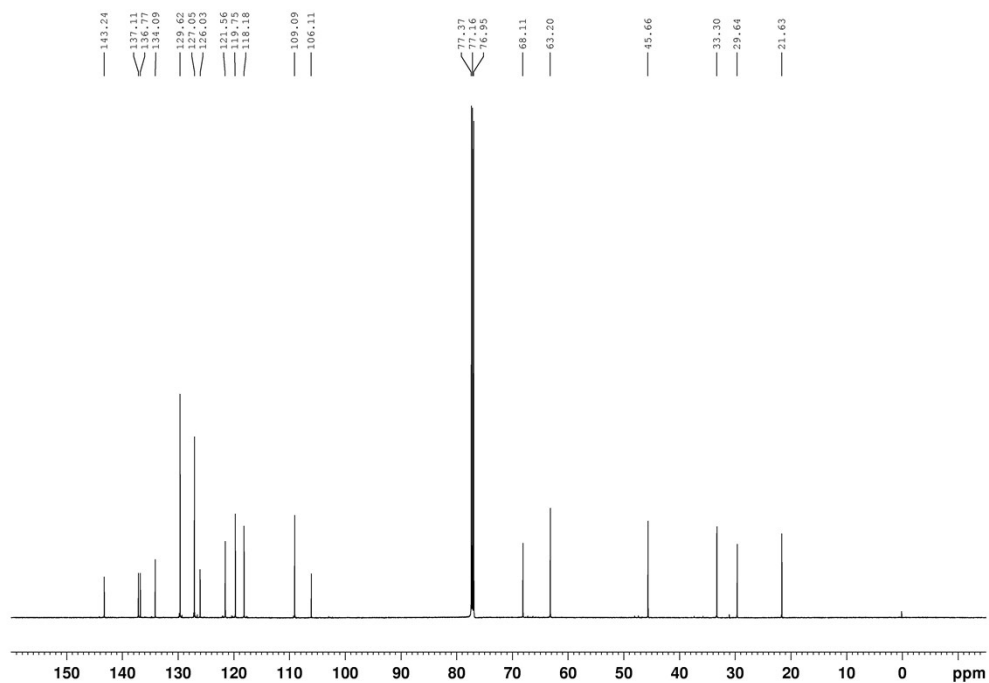

<sup>13</sup>C NMR Spectrum for **11p** (CDCl<sub>3</sub>, 150 MHz)

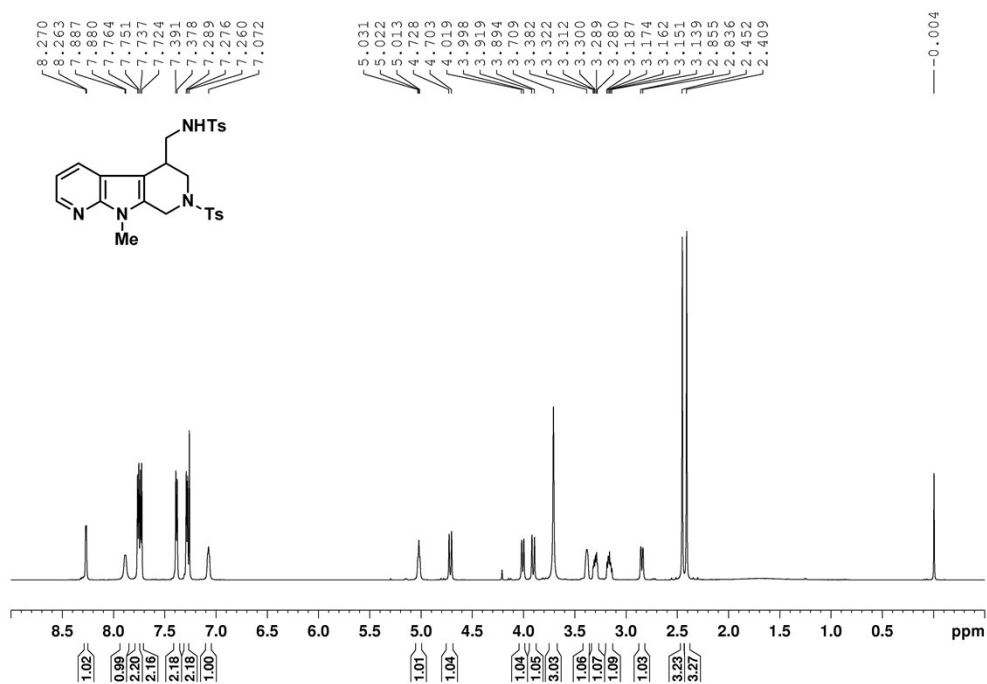

**<sup>1</sup>H NMR Spectrum for 11q (CDCl<sub>3</sub>, 600 MHz)**

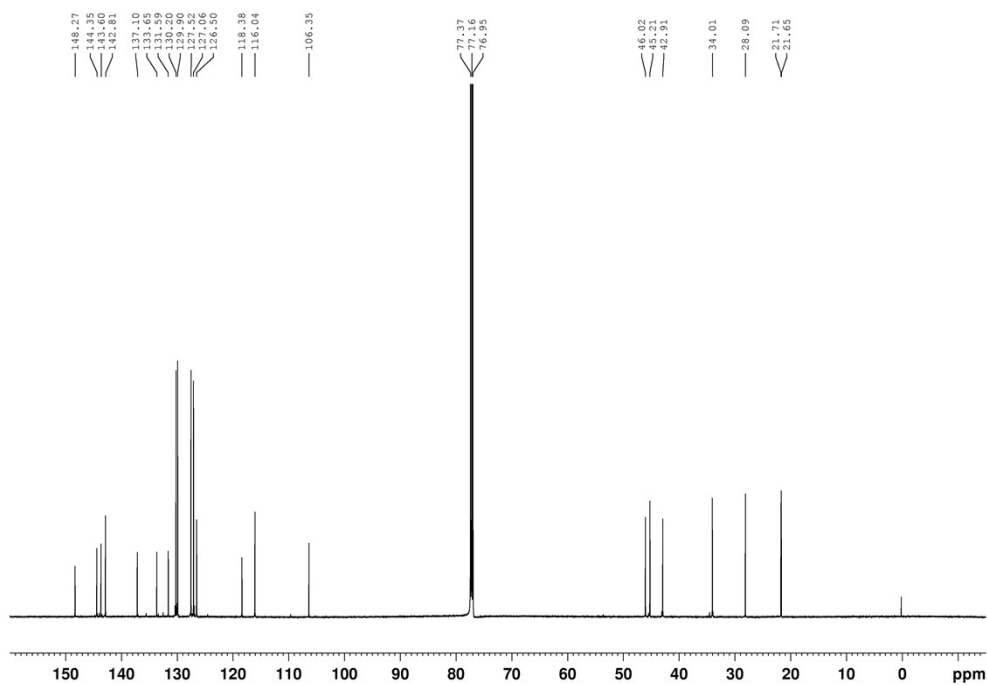

**<sup>13</sup>C NMR Spectrum for 11q (CDCl<sub>3</sub>, 150 MHz)**

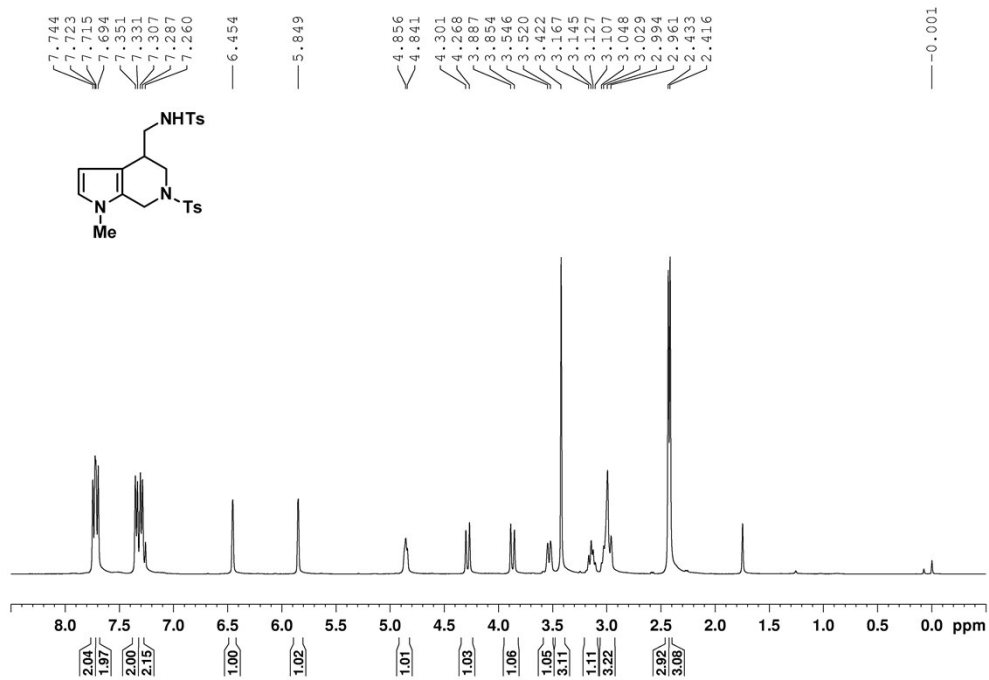

<sup>1</sup>H NMR Spectrum for **11r** (CDCl<sub>3</sub>, 400 MHz)

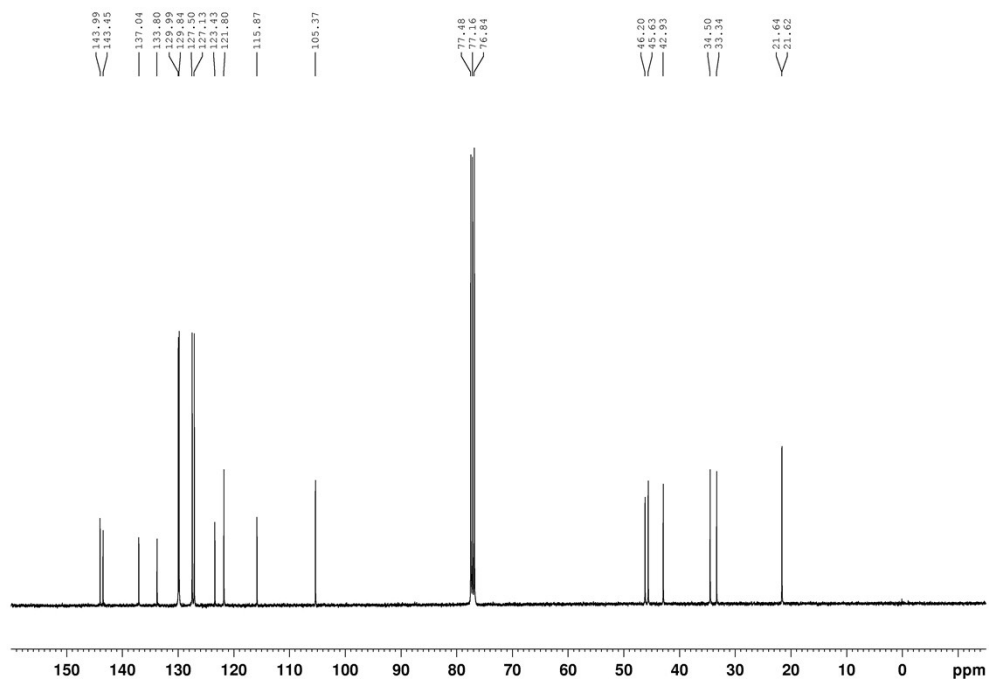

<sup>13</sup>C NMR Spectrum for **11r** (CDCl<sub>3</sub>, 100 MHz)



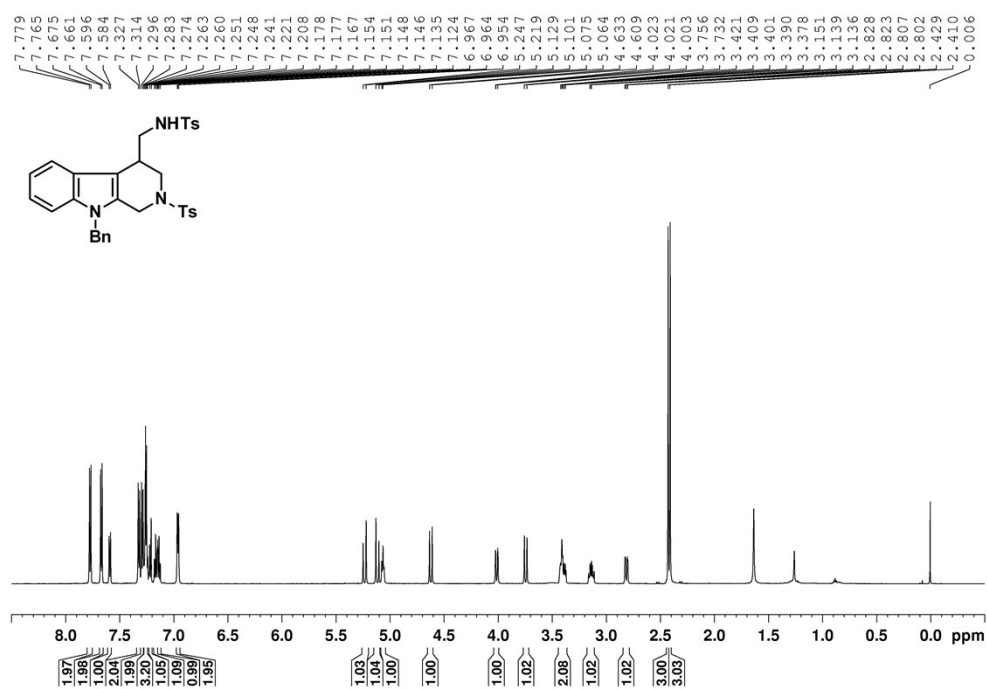

**<sup>1</sup>H NMR Spectrum for 11s (CDCl<sub>3</sub>, 600 MHz)**

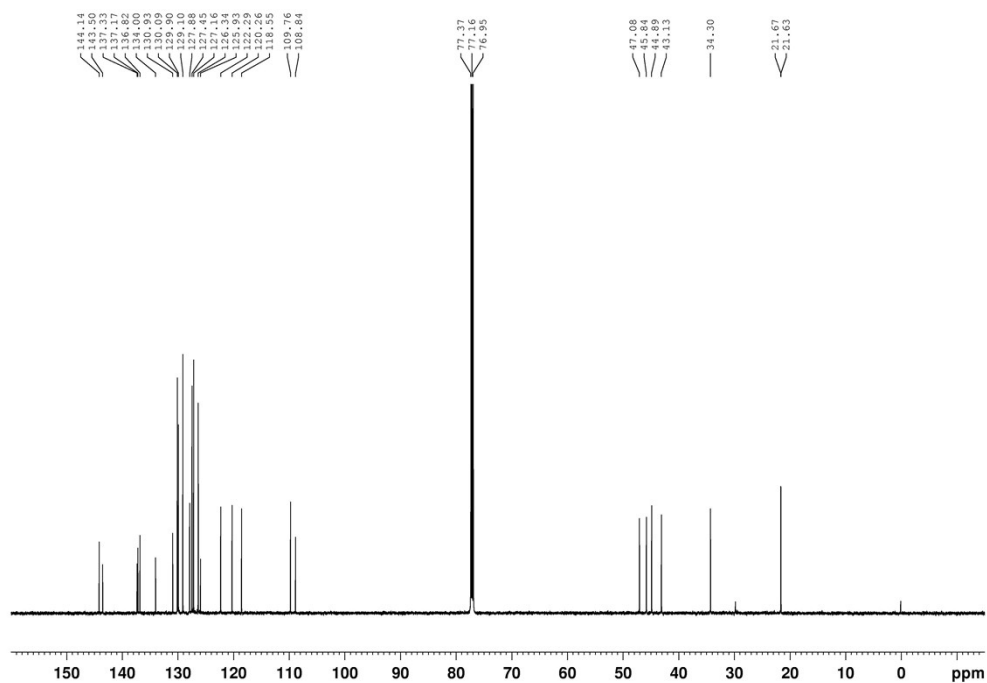

**<sup>13</sup>C NMR Spectrum for 11s (CDCl<sub>3</sub>, 150 MHz)**

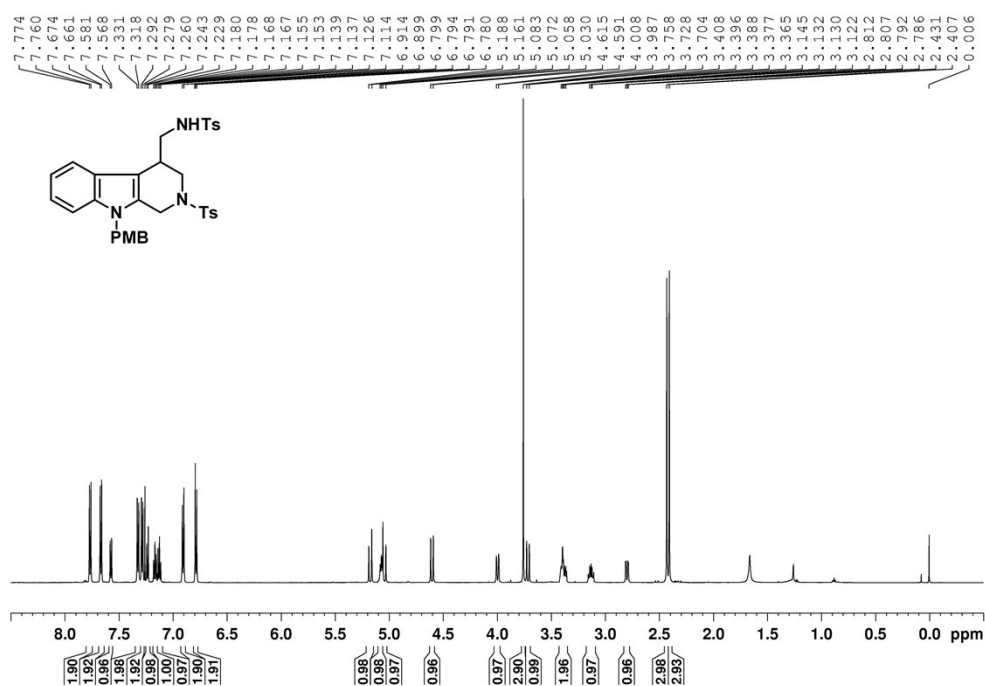

<sup>1</sup>H NMR Spectrum for **11t** (CDCl<sub>3</sub>, 600 MHz)

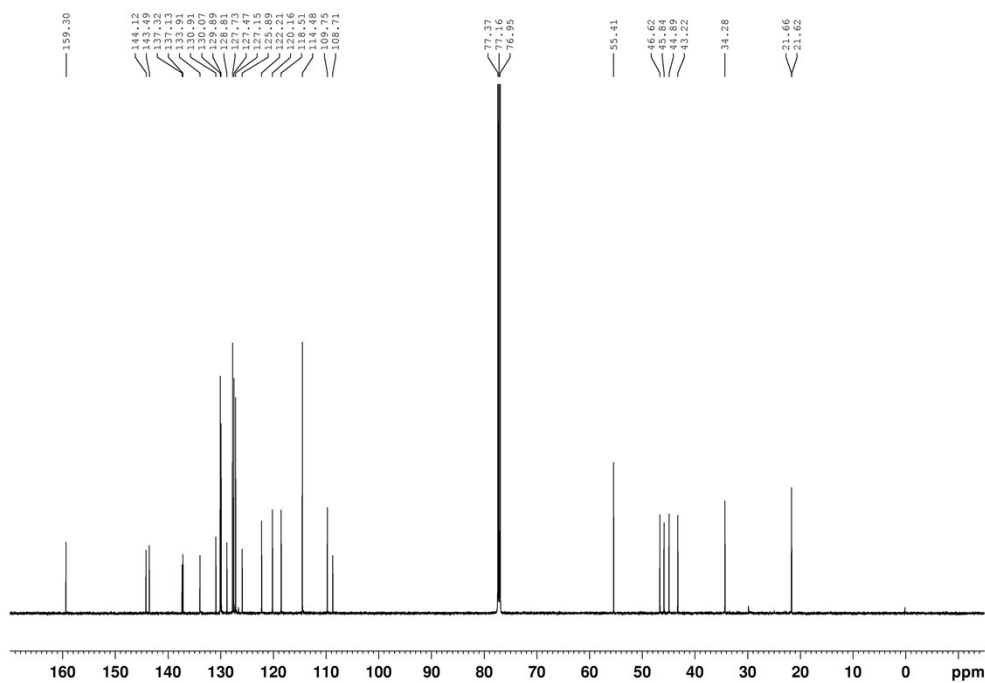

<sup>13</sup>C NMR Spectrum for **11t** (CDCl<sub>3</sub>, 150 MHz)

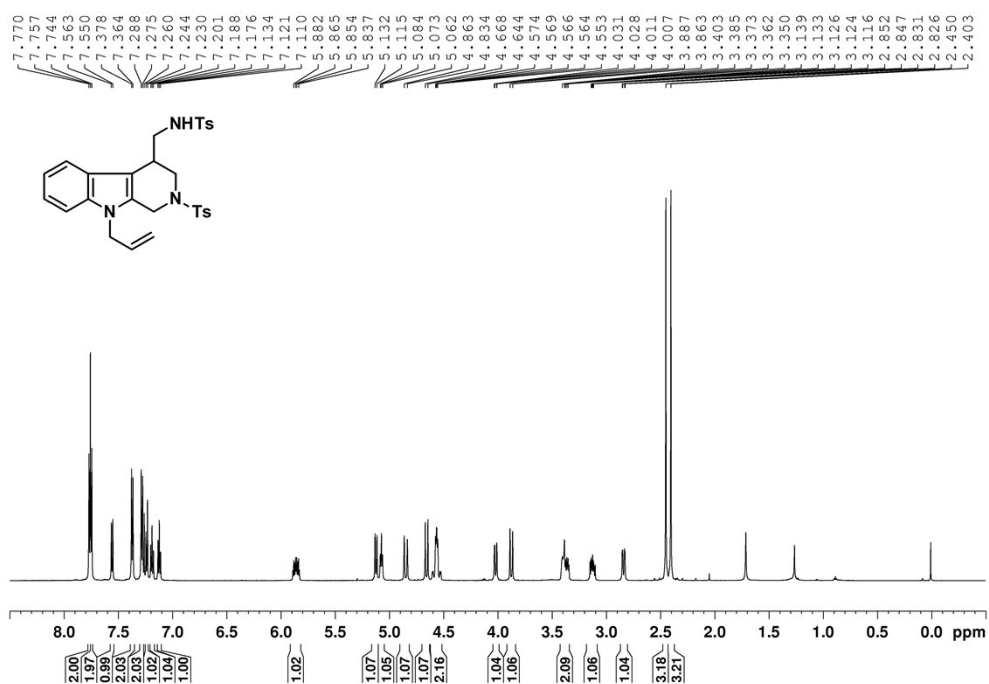

<sup>1</sup>H NMR Spectrum for **11u** (CDCl<sub>3</sub>, 600 MHz)

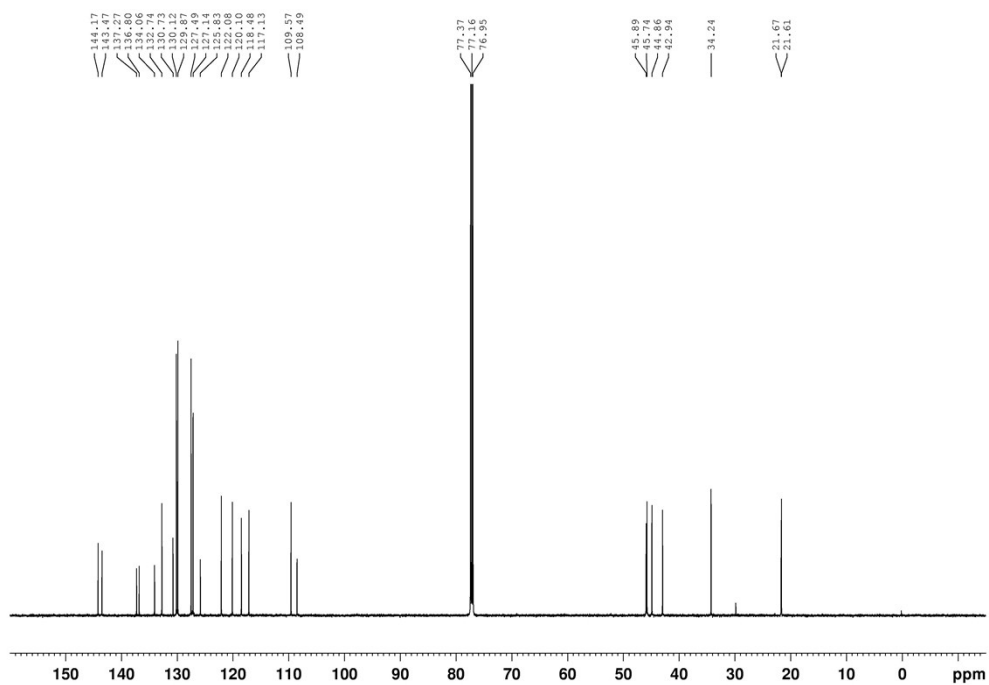

<sup>13</sup>C NMR Spectrum for **11u** (CDCl<sub>3</sub>, 150 MHz)

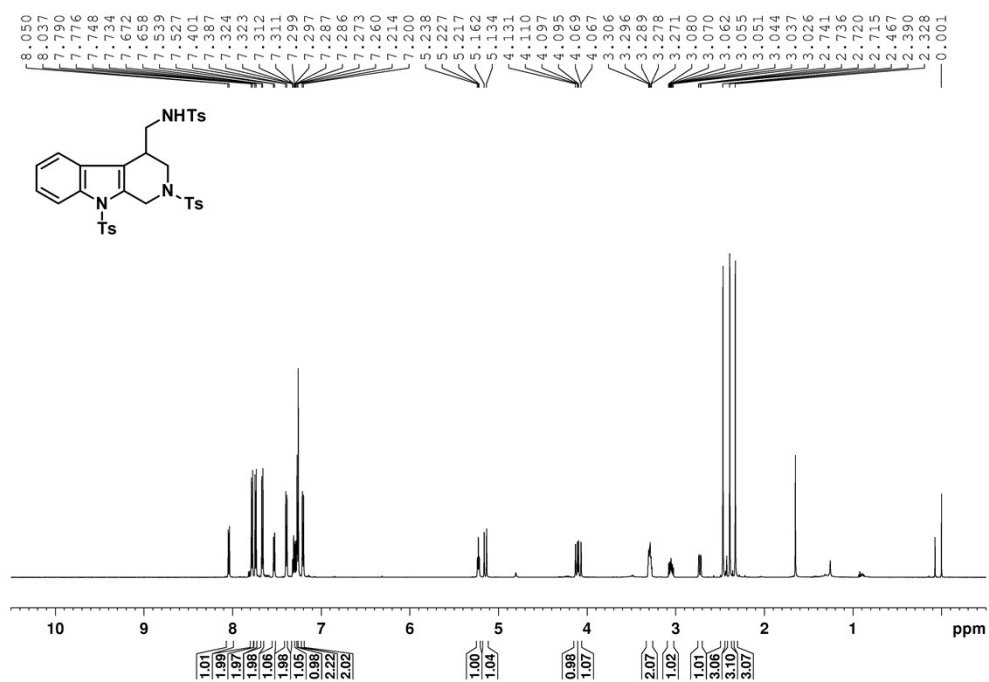

<sup>1</sup>H NMR Spectrum for **11v** (CDCl<sub>3</sub>, 600 MHz)

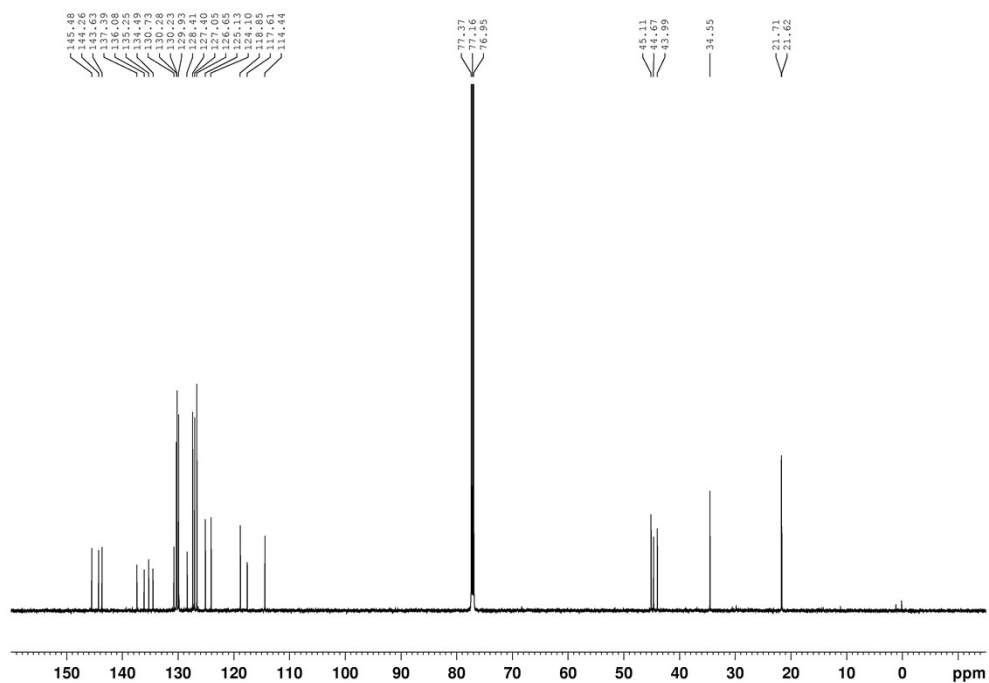

<sup>13</sup>C NMR Spectrum for **11v** (CDCl<sub>3</sub>, 150 MHz)

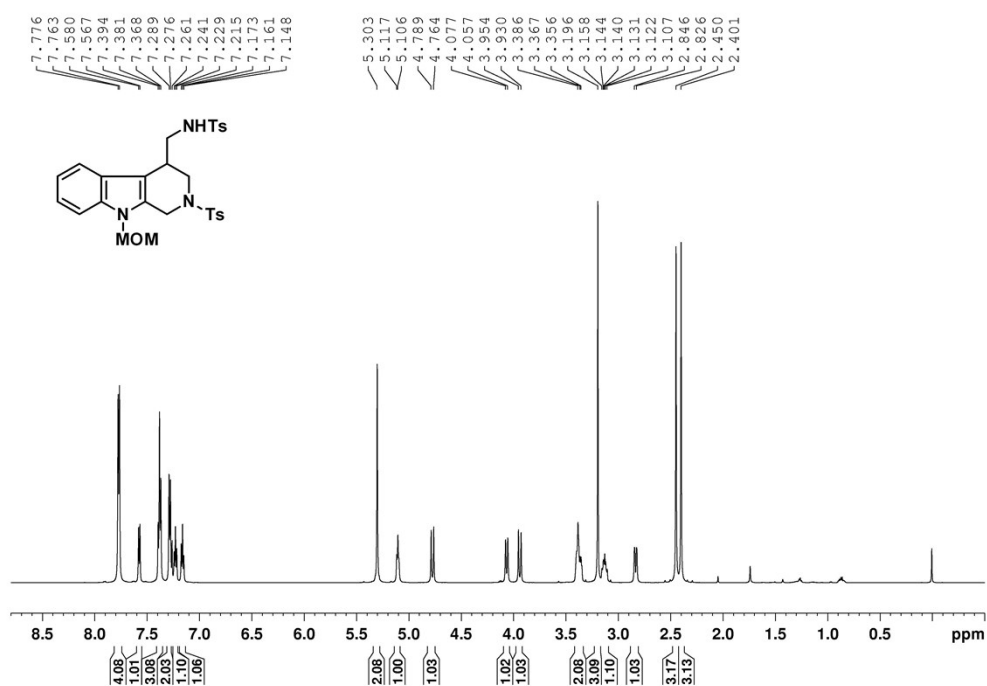

<sup>1</sup>H NMR Spectrum for **11w** (CDCl<sub>3</sub>, 600 MHz)

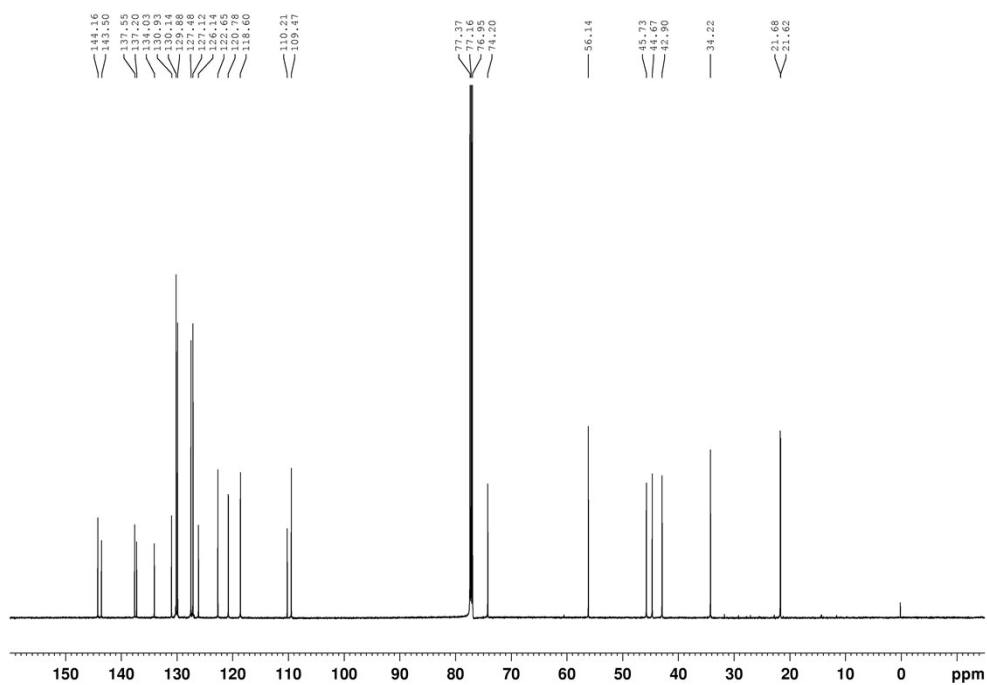

<sup>13</sup>C NMR Spectrum for **11w** (CDCl<sub>3</sub>, 150 MHz)

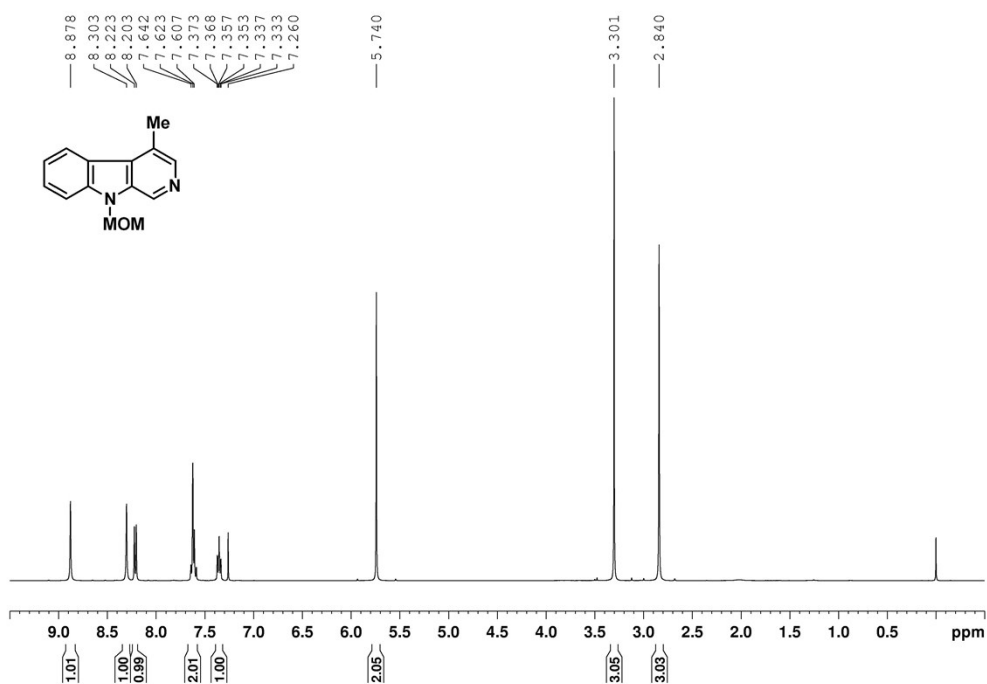

<sup>1</sup>H NMR Spectrum for **13** (CDCl<sub>3</sub>, 600 MHz)

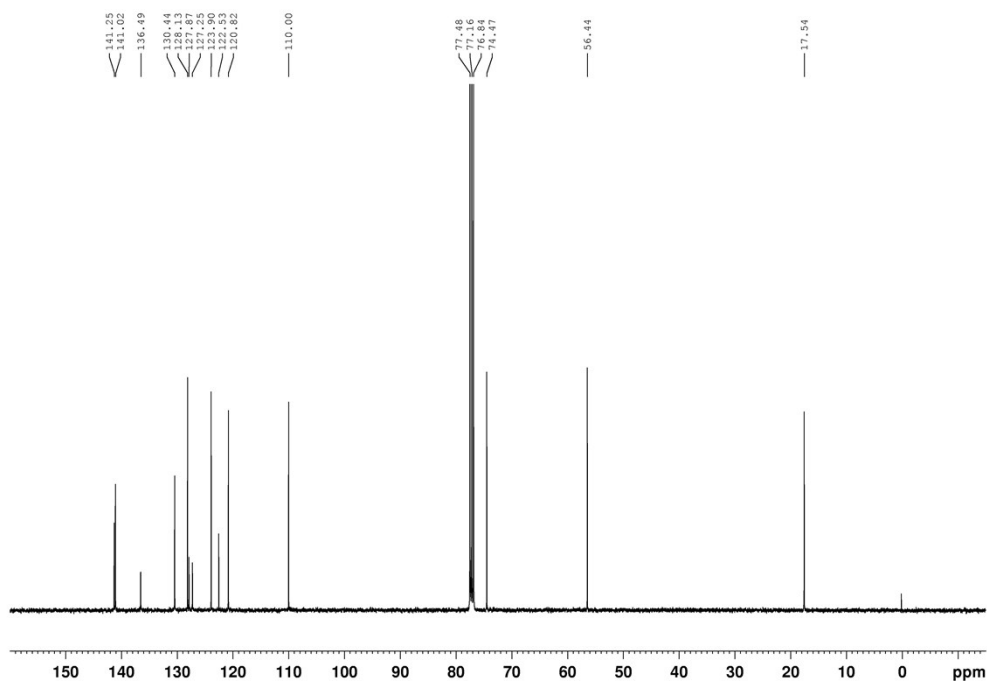

<sup>13</sup>C NMR Spectrum for **13** (CDCl<sub>3</sub>, 150 MHz)

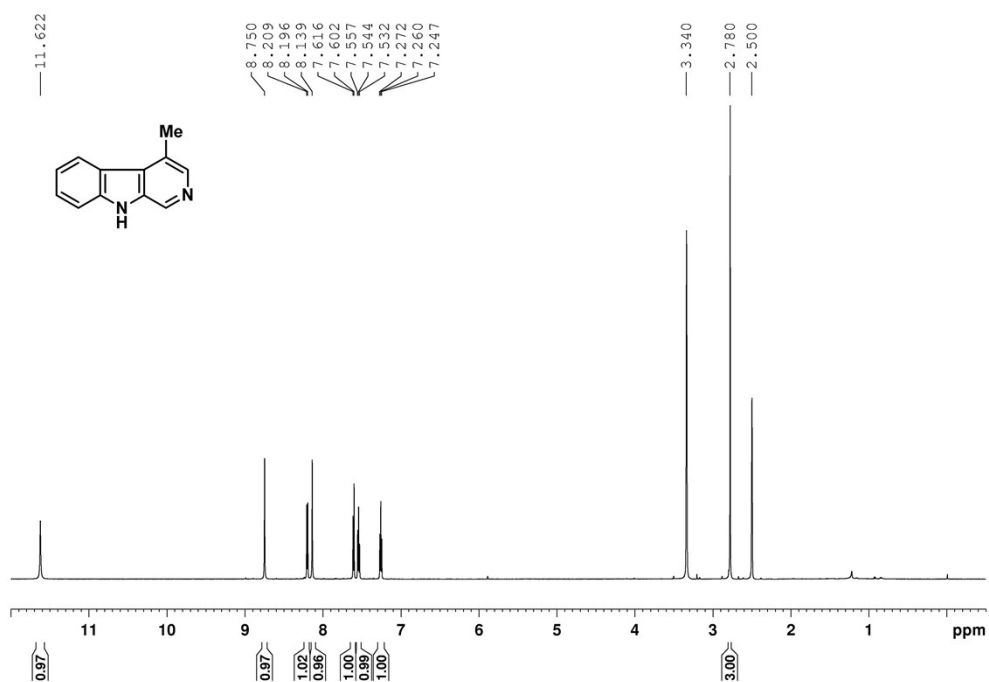

<sup>1</sup>H NMR Spectrum for **14** (DMSO, 600 MHz)

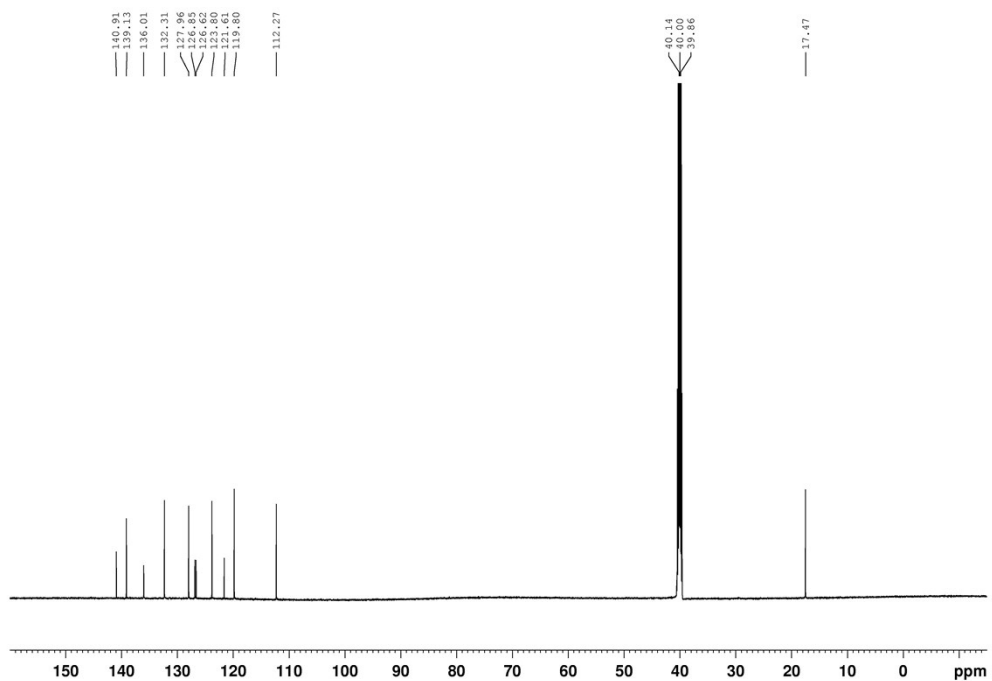

<sup>13</sup>C NMR Spectrum for **14** (DMSO, 150 MHz)
